# Supplementary material
Source: MDPI journal article supplement (https://www.mdpi.com/1424-8247/14/6/528)
Supplement: s1 [file s1]

# Novel N-Arylsulfonylindoles targeted as ligands of the 5-HT<sub>6</sub> Receptor. Insights on the Influence of C-5 substitution on ligand affinity.

Loreto Arrieta Rodríguez,<sup>1,&</sup> Daniela Espinoza Rosales,<sup>1,&</sup> Gonzalo Vera,<sup>1</sup> Young Hwa Cho,<sup>1</sup> David Cabezas,<sup>2,3</sup> David Vásquez-Velásquez,<sup>4</sup> Jaime Mella-Raipán,<sup>2,3</sup> Carlos F. Lagos,<sup>5</sup> Gonzalo Recabarren Gajardo<sup>1,6,\*</sup>

<sup>1</sup> Bioactive Heterocycles Synthesis Laboratory (BHSL), Departamento de Farmacia, Facultad de Química y de Farmacia, Pontificia Universidad Católica de Chile, Avda. Vicuña Mackenna 4860, Macul 7820436, Santiago, Chile; liarriet@uc.cl; dmespino@uc.cl; glvera@uc.cl; aycho@uc.cl

<sup>2</sup> Instituto de Química y Bioquímica, Facultad de Ciencias, Universidad de Valparaíso, Av. Gran Bretaña 1111, Valparaíso 2360102, Chile; jaime.mella@uv.cl

<sup>3</sup> Centro de Investigación Farmacopea Chilena (CIFAR), Universidad de Valparaíso, Santa Marta 183, Valparaíso 2360134, Chile; david.cabezas@postgrado.uv.cl

<sup>4</sup> Drug Development Laboratory, Faculty of Chemical and Pharmaceutical Sciences, Universidad de Chile, Sergio Livingstone 1007, Santiago 8380492, Chile. dvazquez@ciq.uchile.cl

<sup>5</sup> Chemical Biology & Drug Discovery Lab, Escuela de Química y Farmacia, Facultad de Medicina y Ciencia, Universidad San Sebastián, Lota 2465, Providencia 7510157, Santiago, Chile; carlos.lagos@uss.cl

<sup>6</sup> Centro Interdisciplinario de Neurociencias, Pontificia Universidad Católica de Chile, Marcoleta 391, Santiago 8330024, Santiago, Chile; grecabarren@uc.cl

& These authors contributed equally to this work

\* Correspondence: grecabarren@uc.cl; Tel.: +56 2 23541418

## Contents:

|                                                                               |     |
|-------------------------------------------------------------------------------|-----|
| 1. Atom numbering for the final compounds.....                                | S2  |
| 2. <sup>1</sup> H-NMR and <sup>13</sup> C-NMR spectra of final compounds..... | S3  |
| 3. High resolution mass spectra of final compounds.....                       | S32 |
| 4. Radioligand binding studies .....                                          | S43 |
| 5. Tables and figures of QSAR .....                                           | S47 |
| 6. References .....                                                           | S50 |

## 1. Atom numbering for the final compounds.

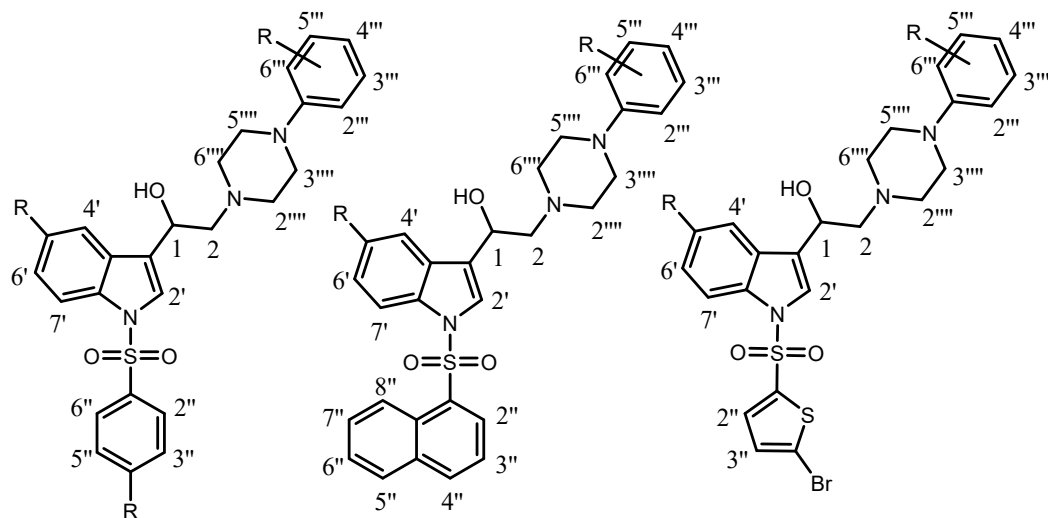

**4a-b, 4h, 4j, 4o-p, 4u-v**

**4d-e, 4g, 4l, 4n**

**4i, 4r**

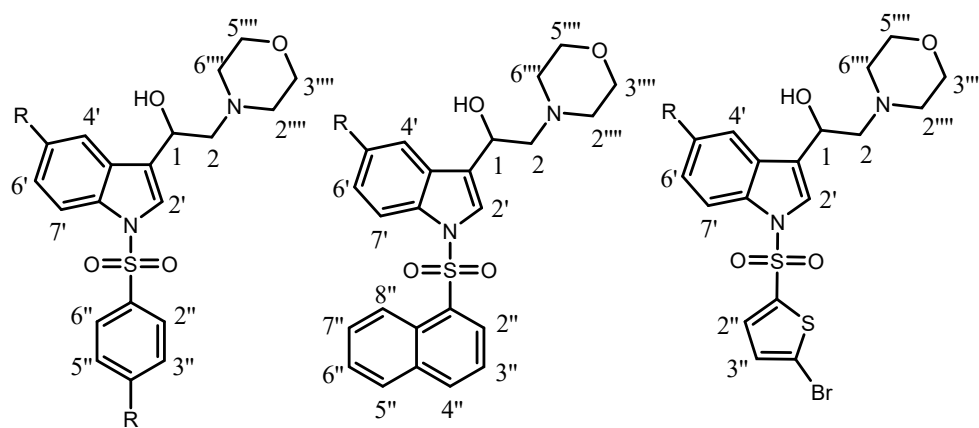

**4c, 4k, 4q, 4t**

**4f, 4m**

**4s**

## 2. $^1\text{H}$ -NMR and $^{13}\text{C}$ -NMR spectra of final compounds.

$^1\text{H}$ -NMR (400.1 MHz,  $\text{CDCl}_3$ ) for **4a**

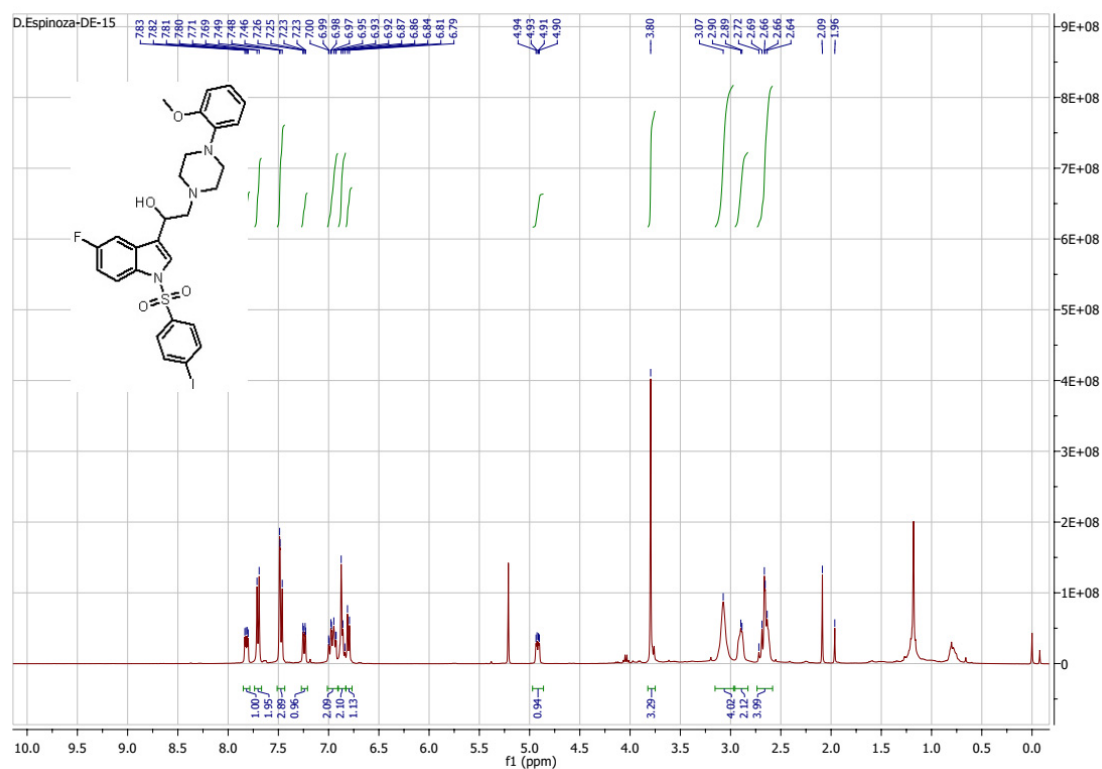

$^{13}\text{C}$ -NMR (100.6 MHz,  $\text{CDCl}_3$ ) for **4a**

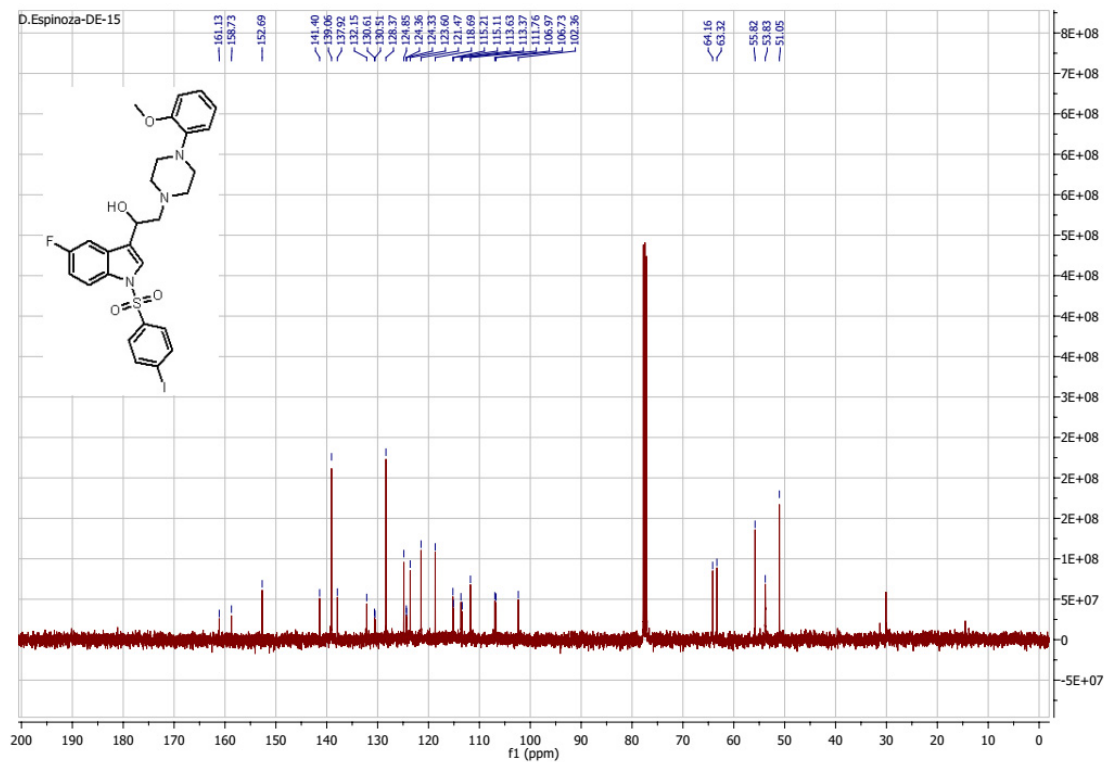

$^1\text{H}$ -NMR (400.1 MHz,  $\text{CDCl}_3$ ) for **4b**

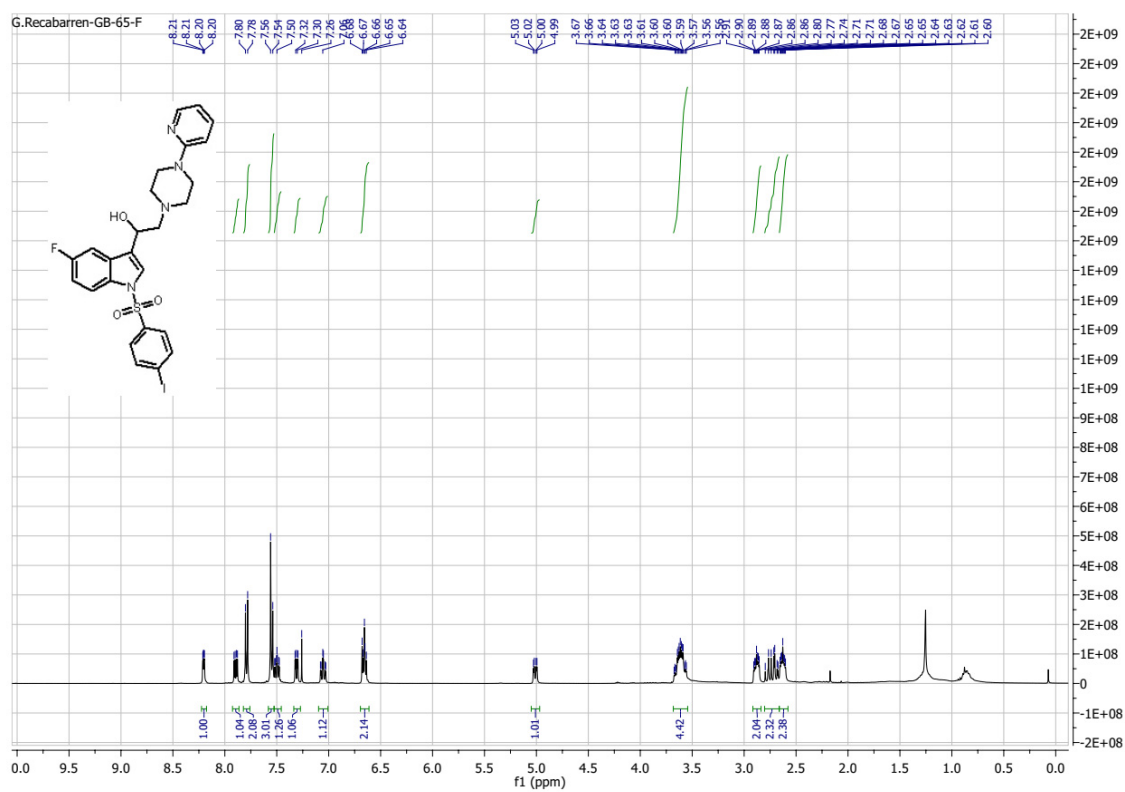

$^{13}\text{C}$ -NMR (100.6 MHz,  $\text{CDCl}_3$ ) for **4b**

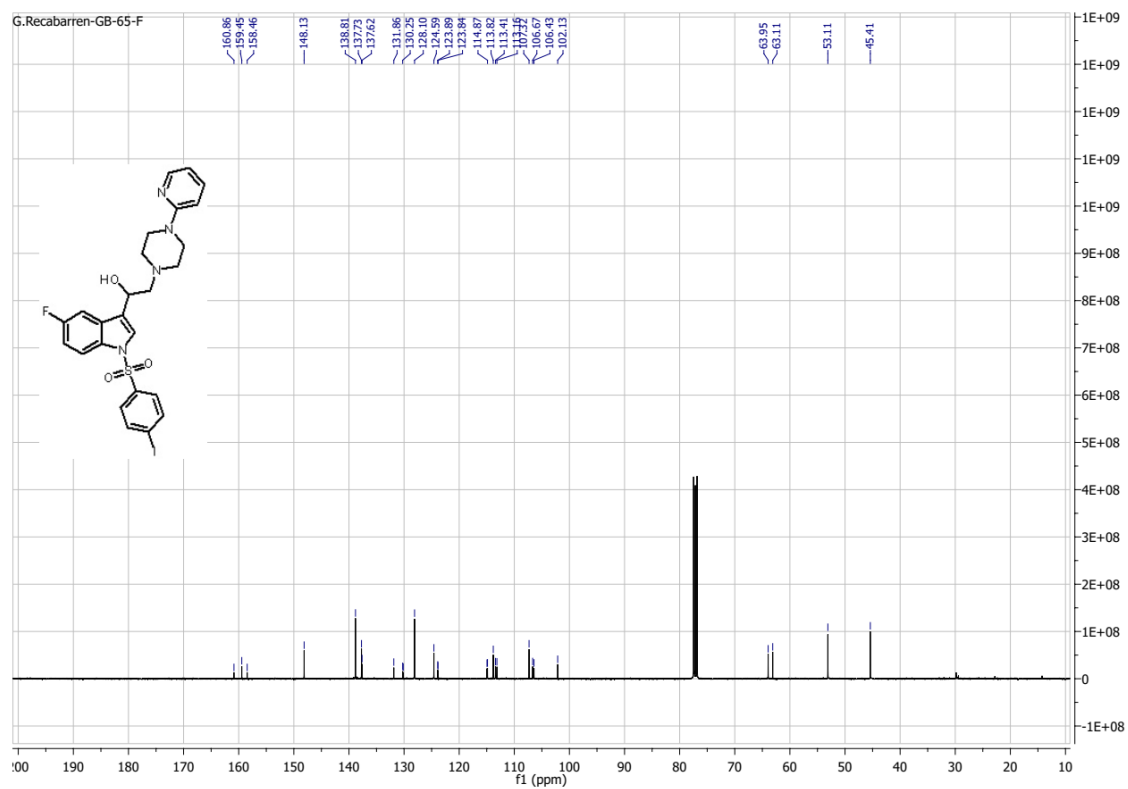



$^{19}\text{F}$ -NMR (376.5 MHz,  $\text{CDCl}_3$ ) for **4b**

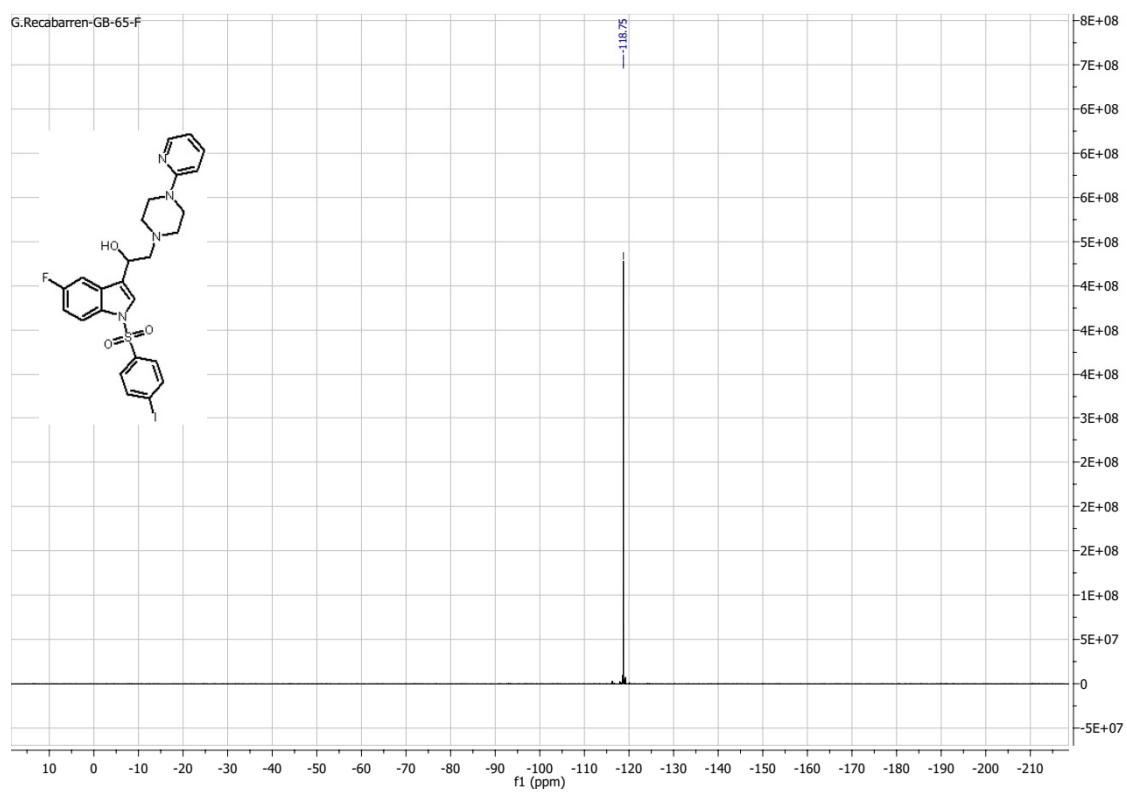

$^1\text{H}$ -NMR (400.1 MHz,  $\text{CDCl}_3$ ) for **4c**

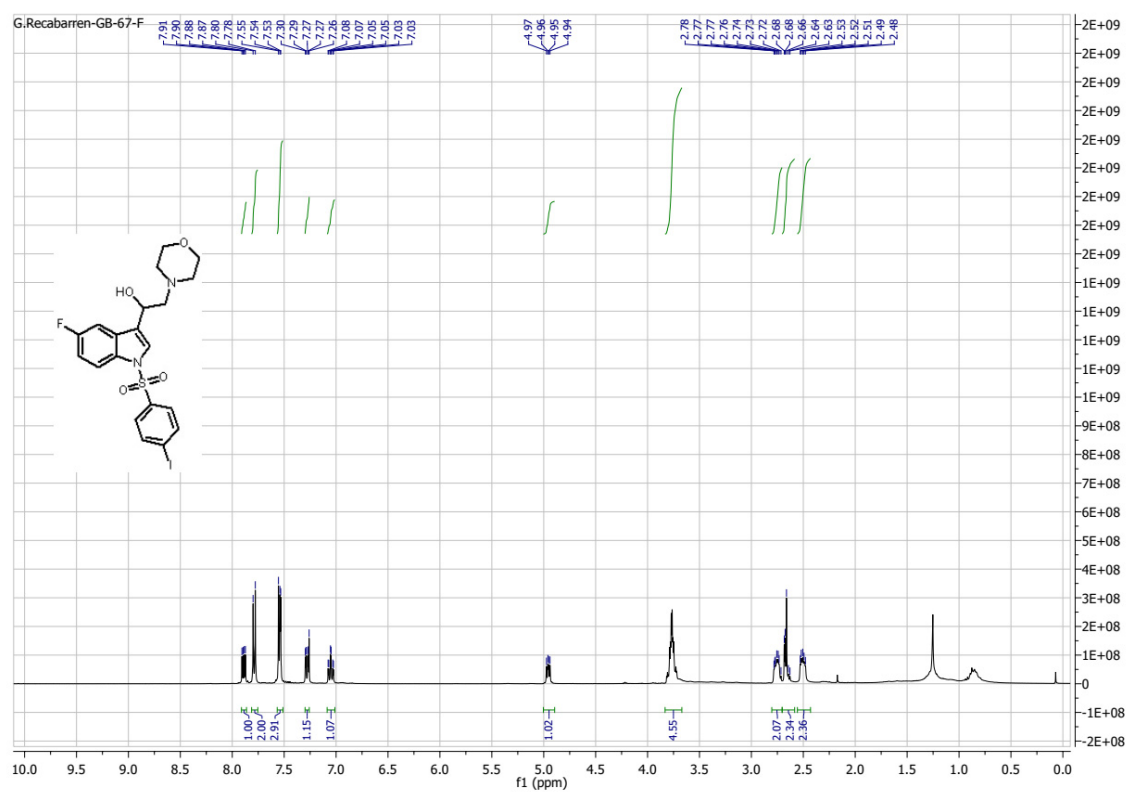

$^{13}\text{C}$ -NMR (100.6 MHz,  $\text{CDCl}_3$ ) for **4c**

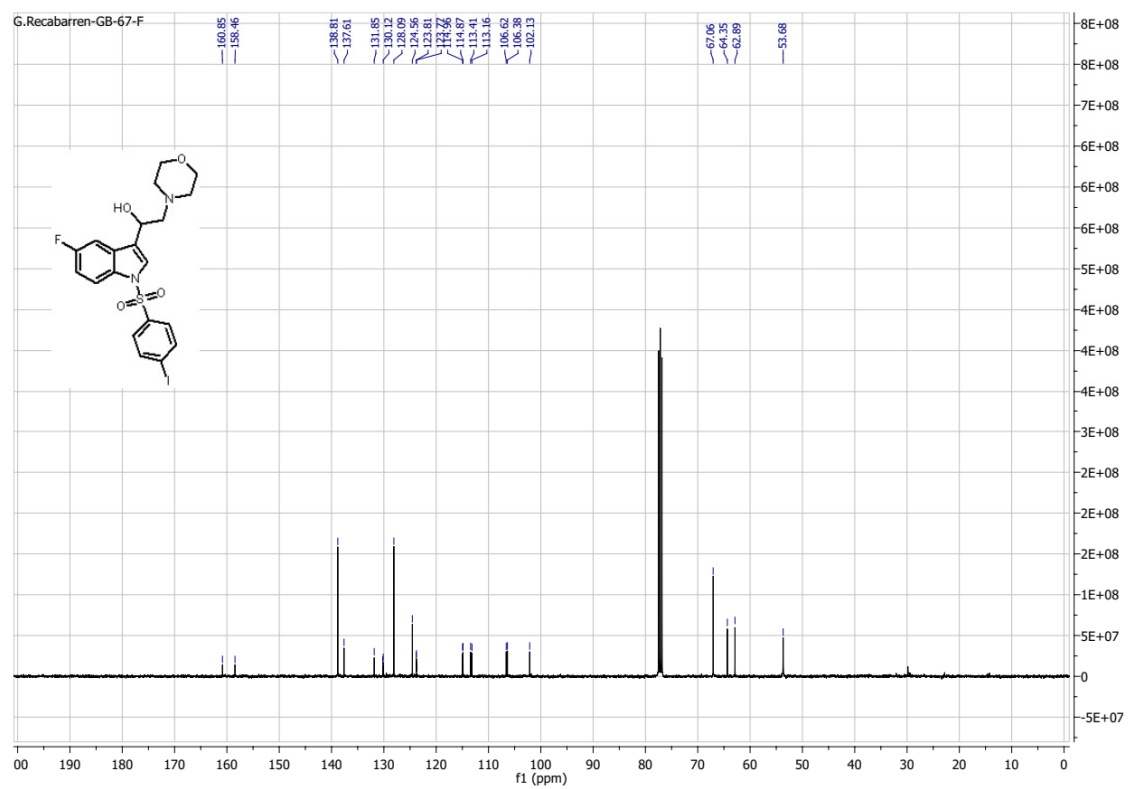

$^{19}\text{F}$ -NMR (376.5 MHz,  $\text{CDCl}_3$ ) for **4c**

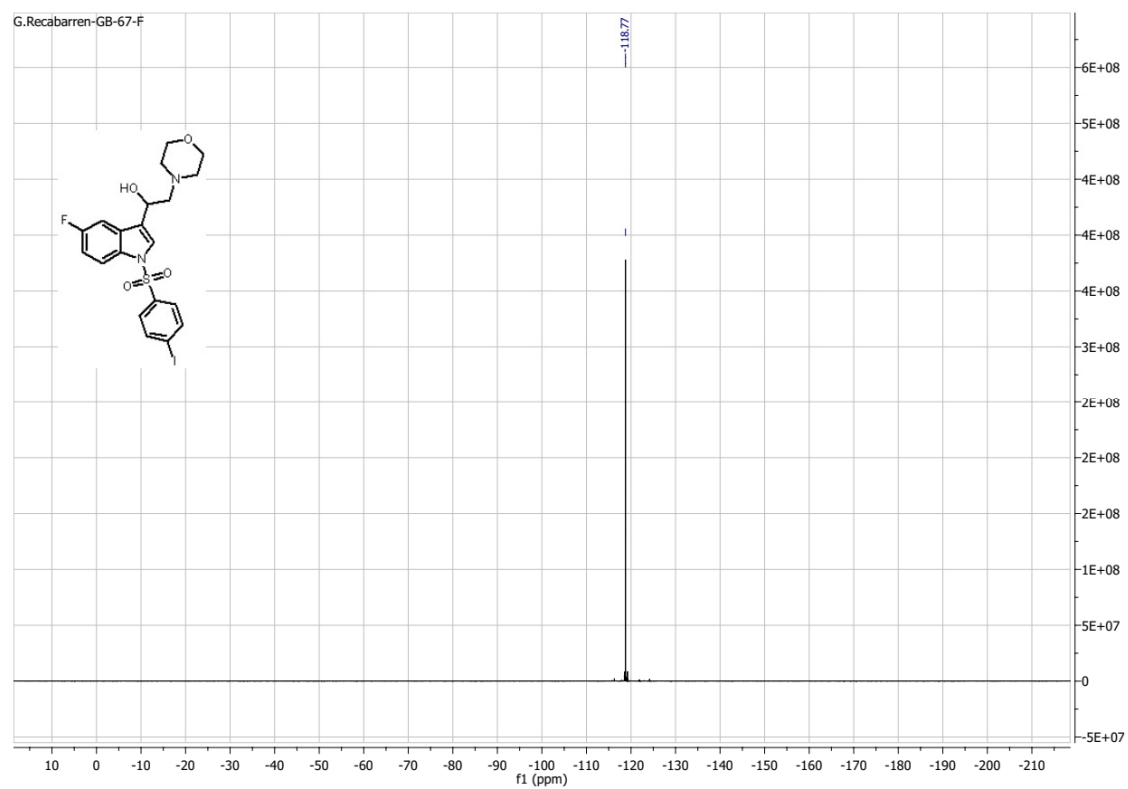

<sup>1</sup>H-NMR (400.1 MHz, CDCl<sub>3</sub>) for **4d**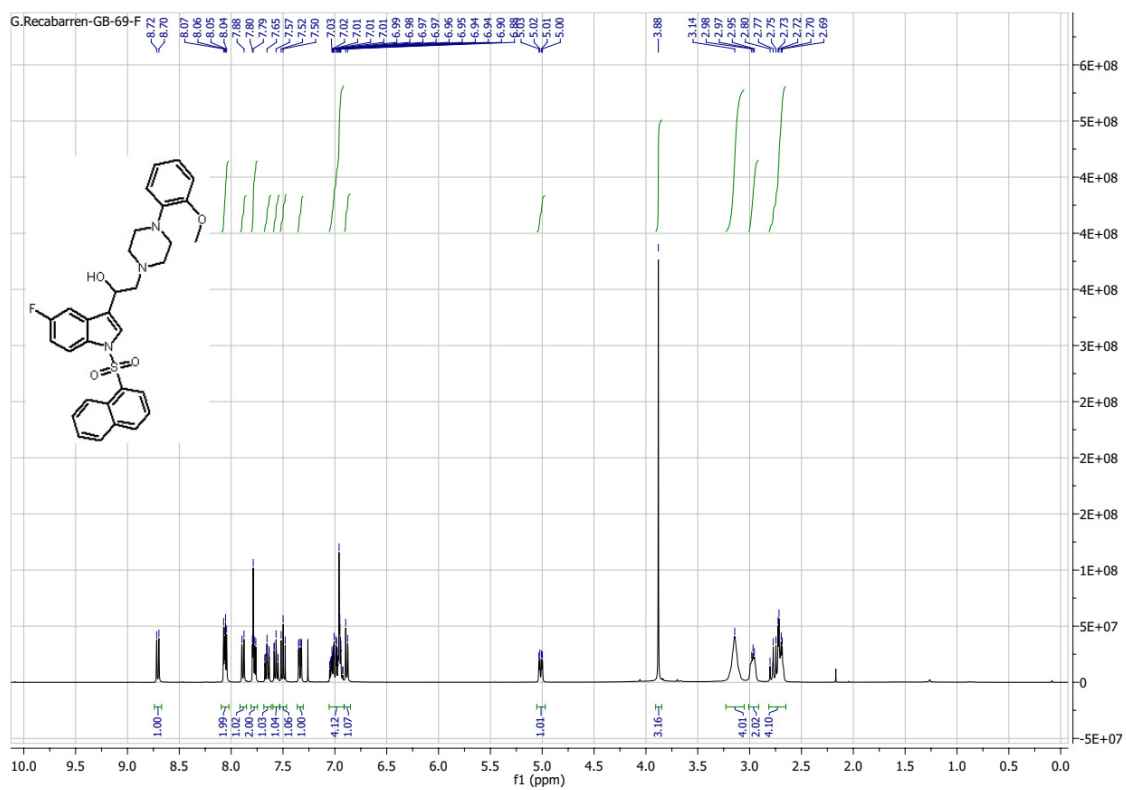 $^{13}\text{C}$ -NMR (100.6 MHz,  $\text{CDCl}_3$ ) for **4d**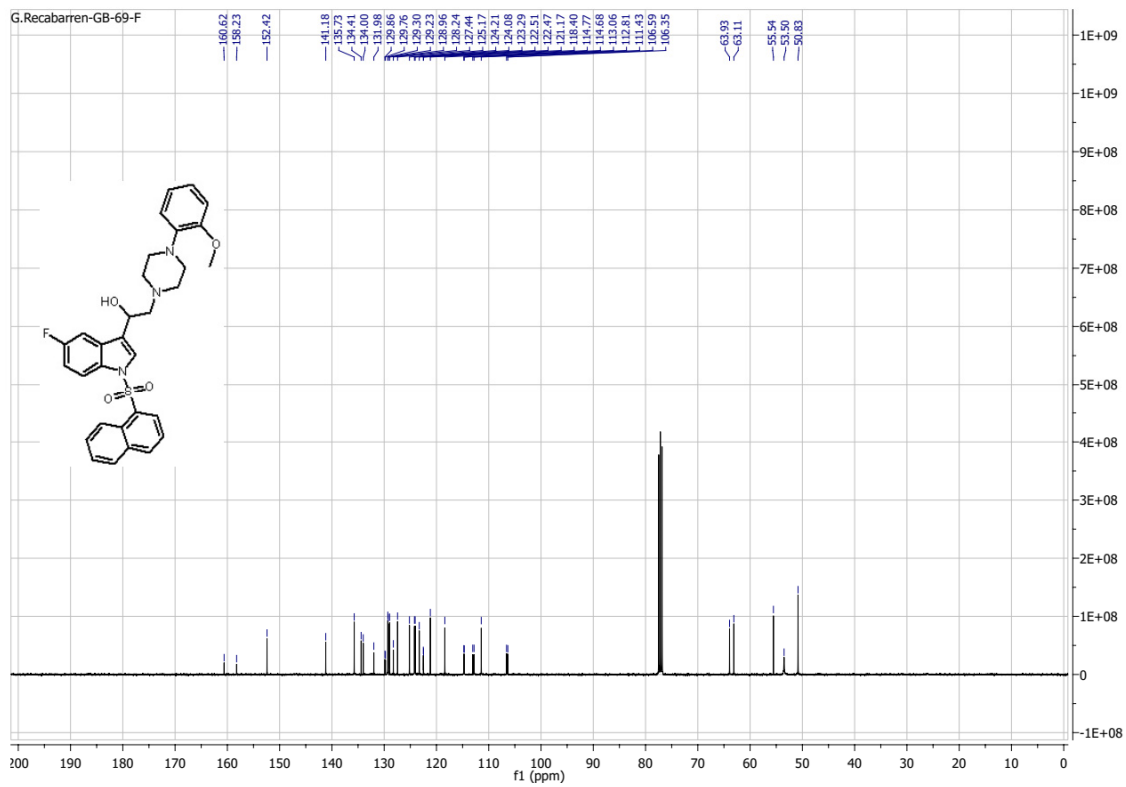

$^{19}\text{F}$ -NMR (376.5 MHz,  $\text{CDCl}_3$ ) for **4d**

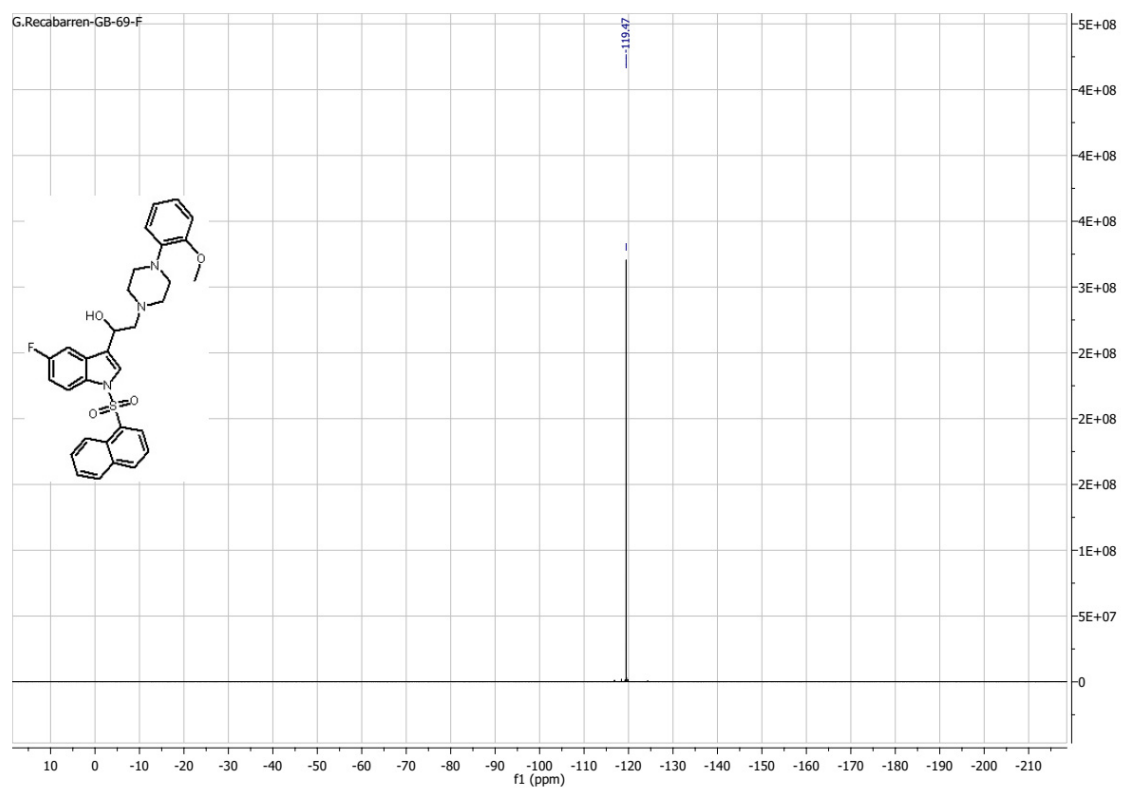

<sup>1</sup>H-NMR (400.1 MHz, CDCl<sub>3</sub>) for **4e**

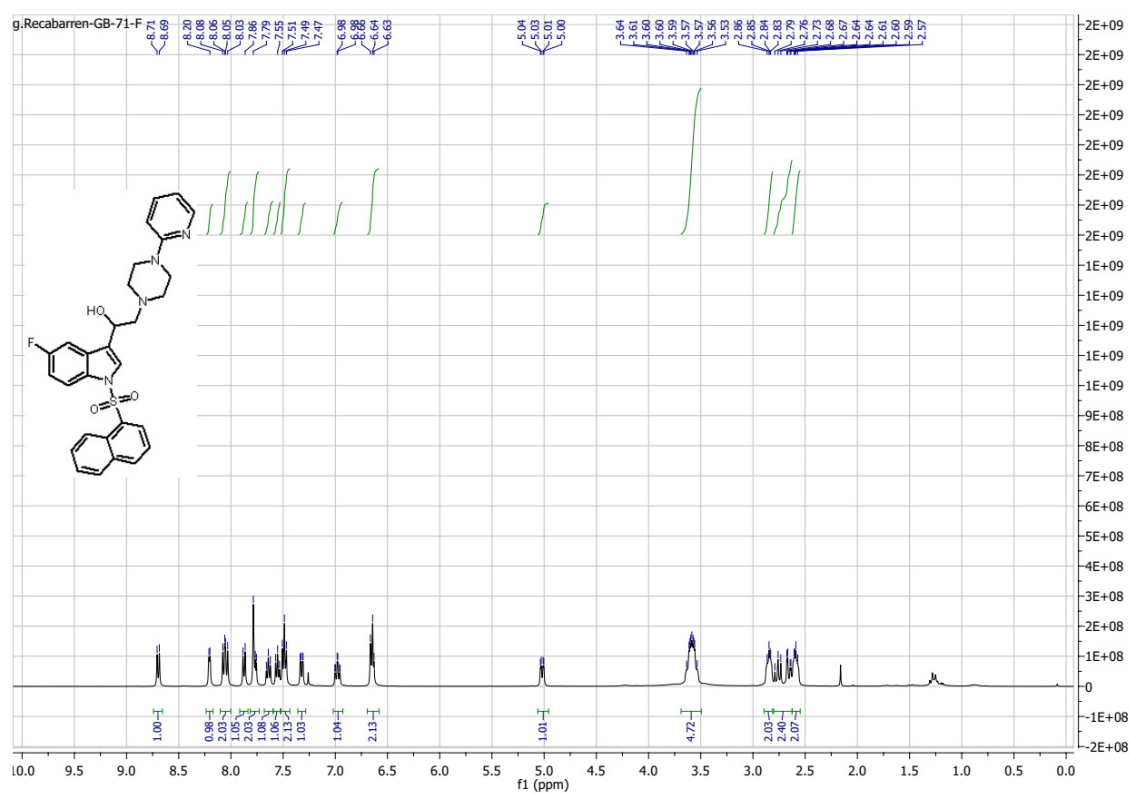

<sup>13</sup>C-NMR (100.6 MHz, CDCl<sub>3</sub>) for **4e**

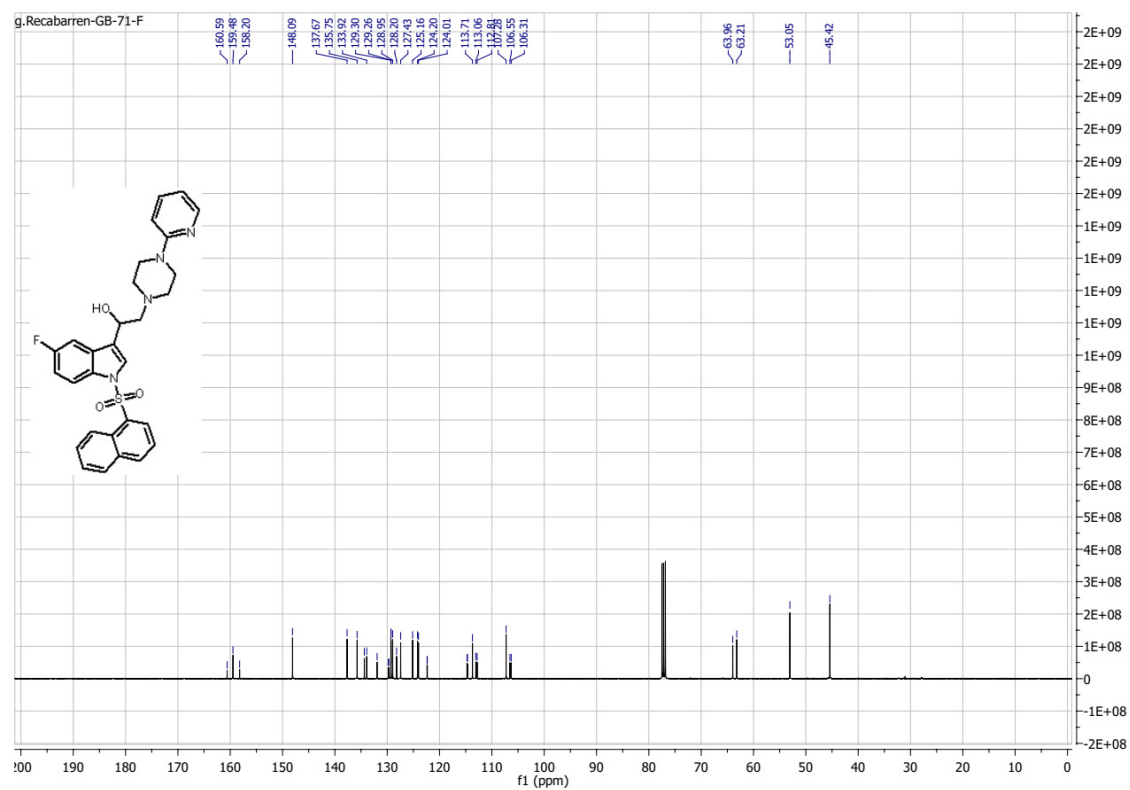

$^{19}\text{F}$ -NMR (376.5 MHz,  $\text{CDCl}_3$ ) for **4e**

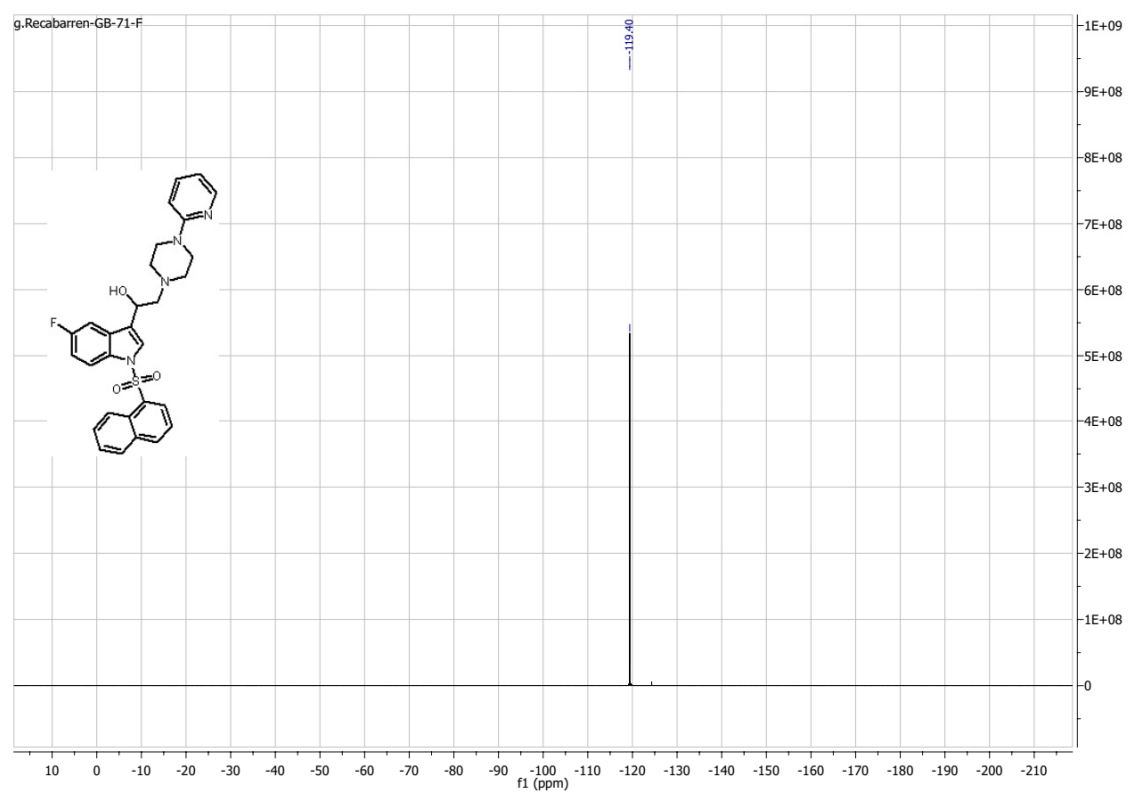

$^1\text{H}$ -NMR (400.1 MHz,  $\text{CDCl}_3$ ) for **4f**

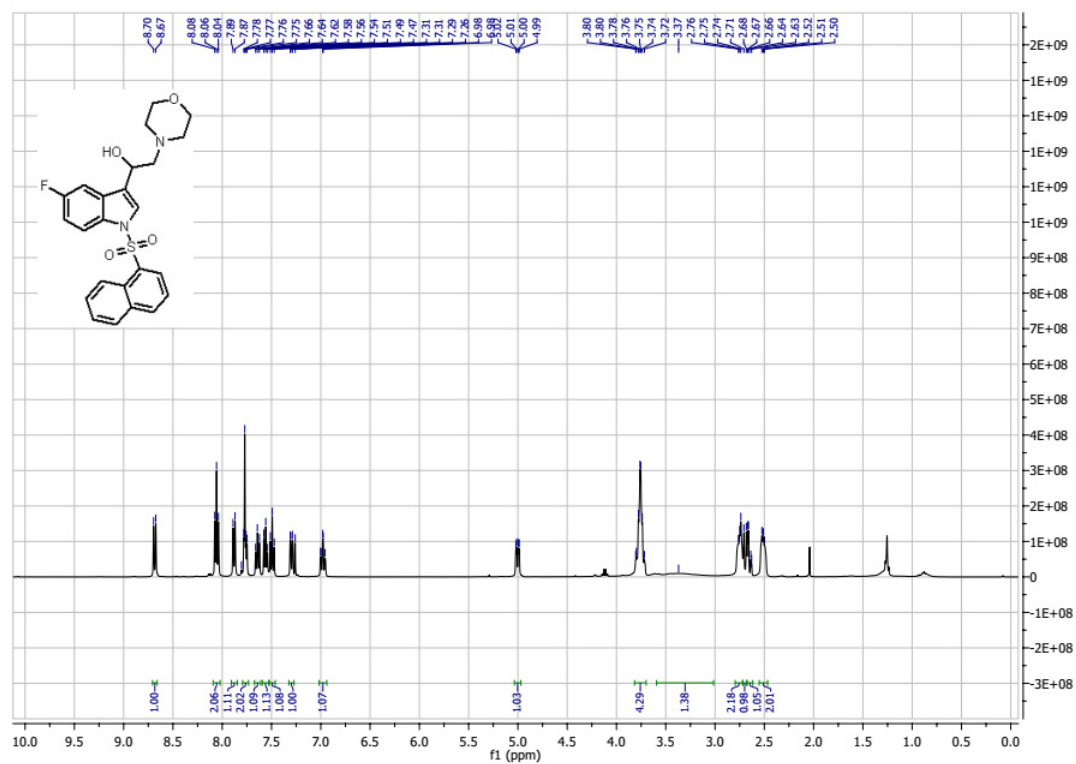

$^{13}\text{C}$ -NMR (100.6 MHz,  $\text{CDCl}_3$ ) for **4f**

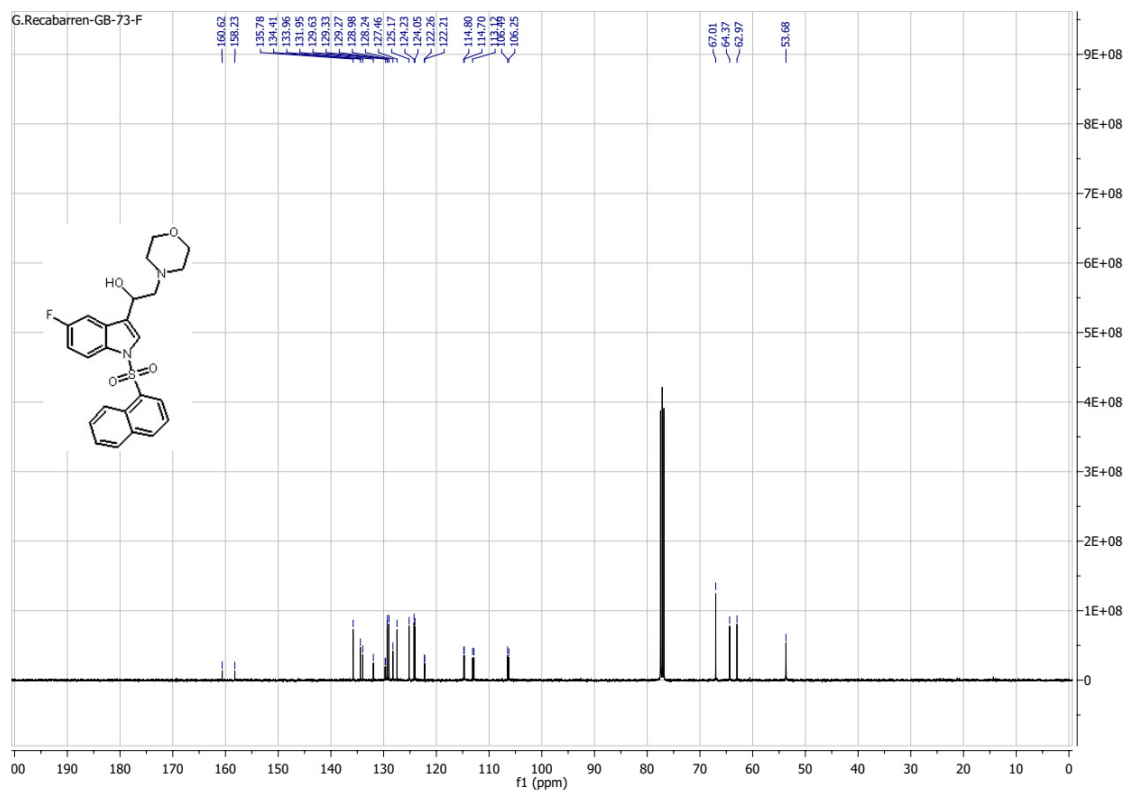



$^{19}\text{F}$ -NMR (376.5 MHz,  $\text{CDCl}_3$ ) for **4f**

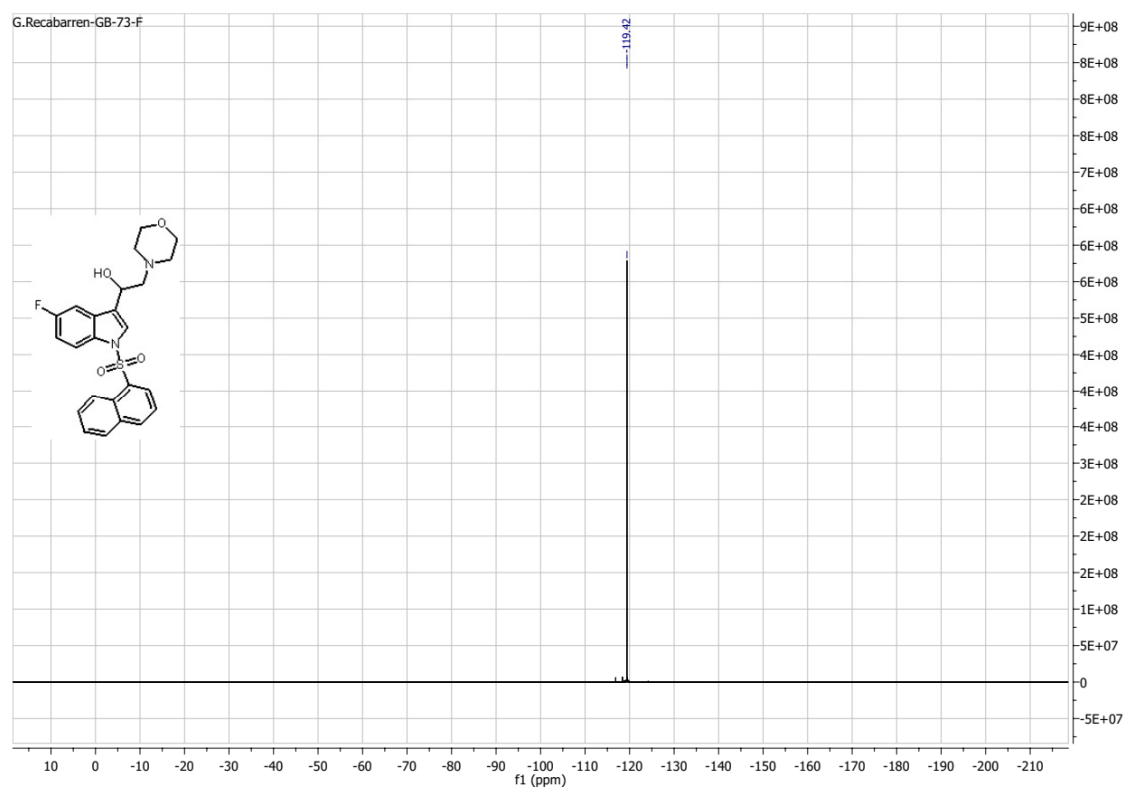

<sup>1</sup>H-NMR (400.1 MHz, CDCl<sub>3</sub>) for **4g**

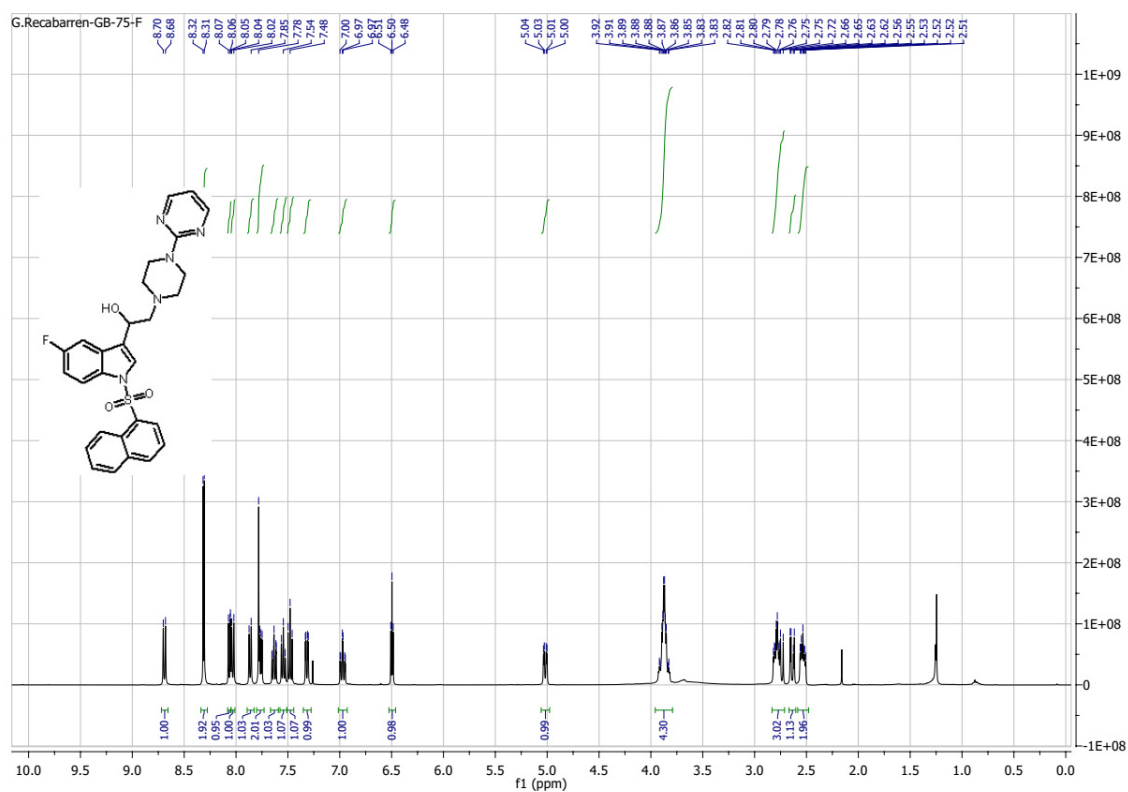

<sup>13</sup>C-NMR (100.6 MHz, CDCl<sub>3</sub>) for **4g**

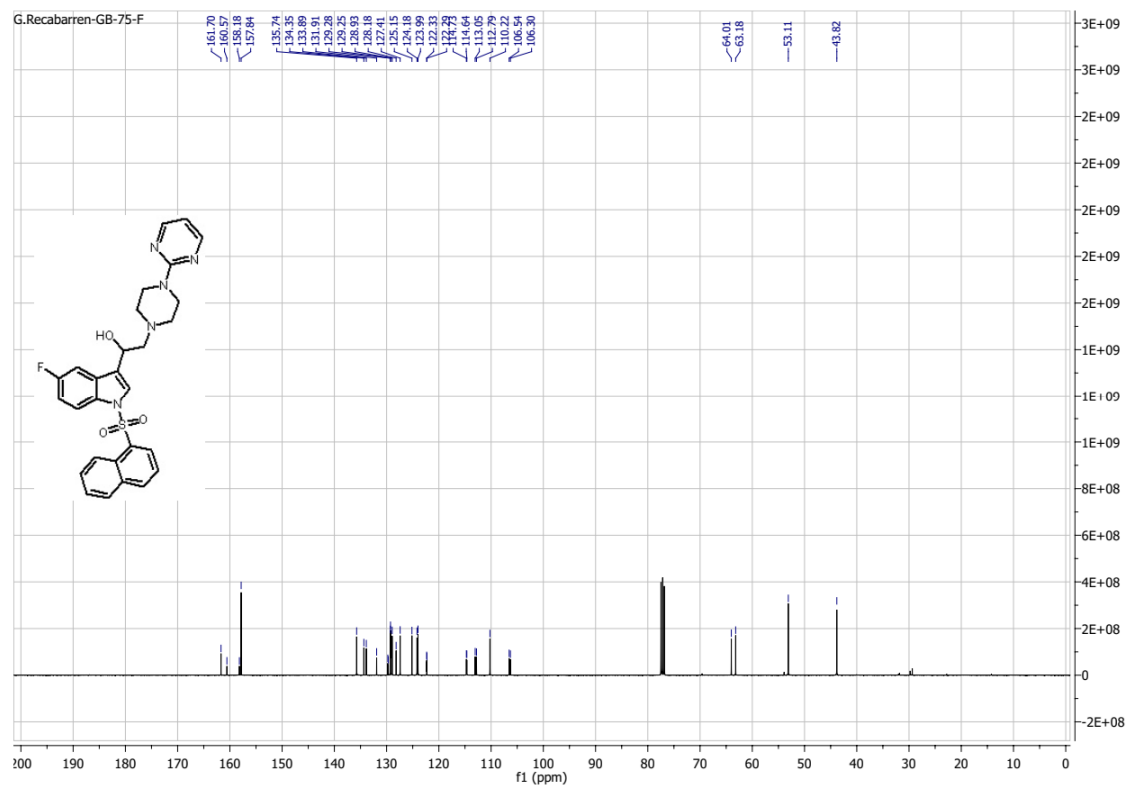

$^{19}\text{F}$ -NMR (376.5 MHz,  $\text{CDCl}_3$ ) for **4g**

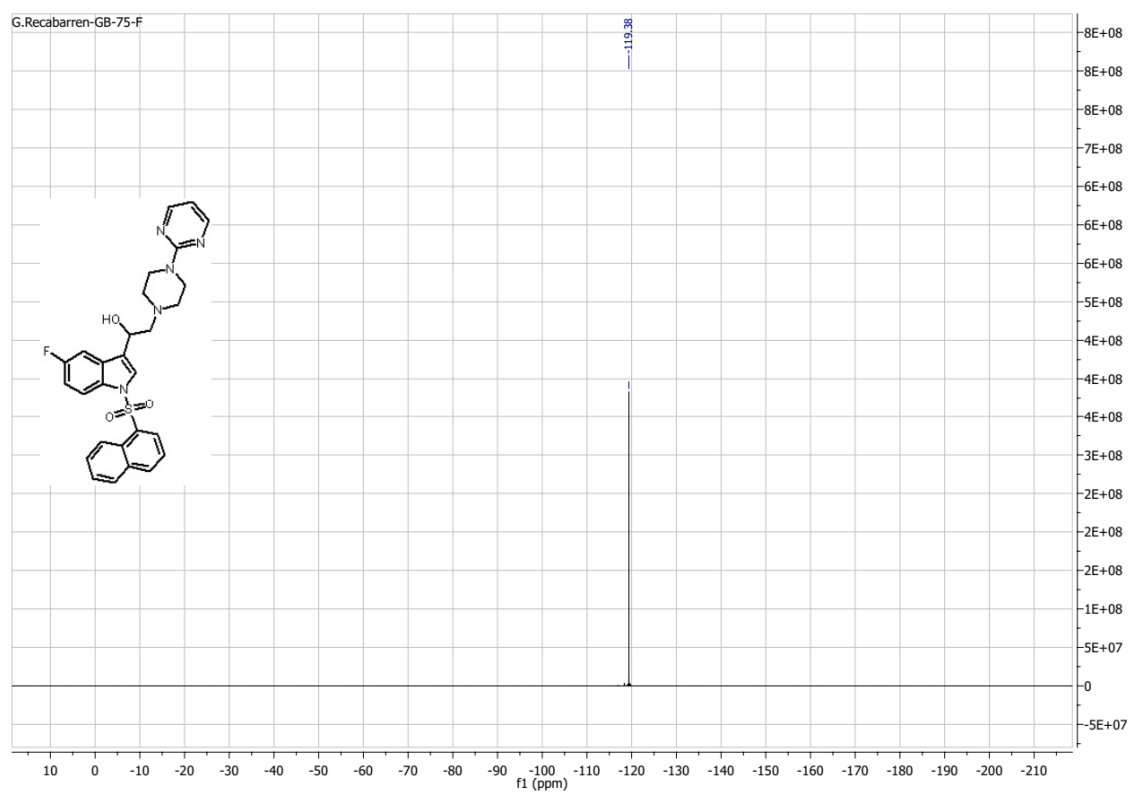

$^1\text{H}$ -NMR (400.1 MHz,  $\text{CDCl}_3$ ) for **4h**

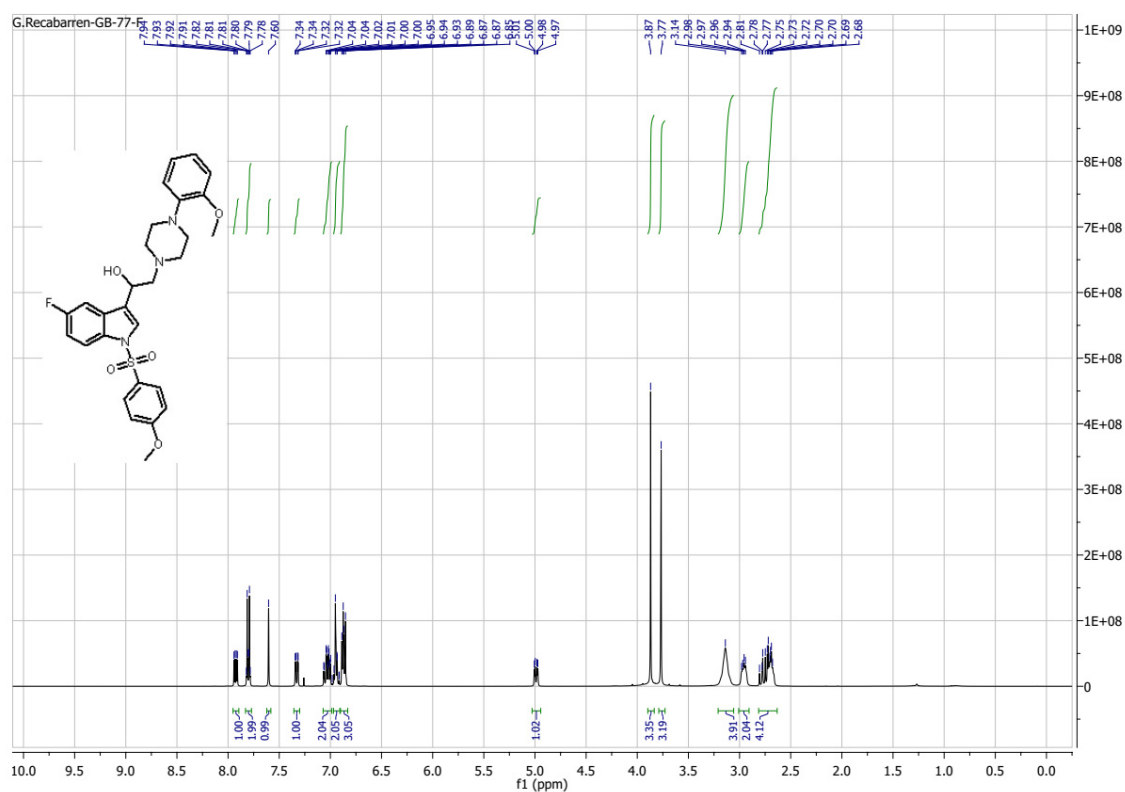

$^{13}\text{C}$ -NMR (100.6 MHz,  $\text{CDCl}_3$ ) for **4h**

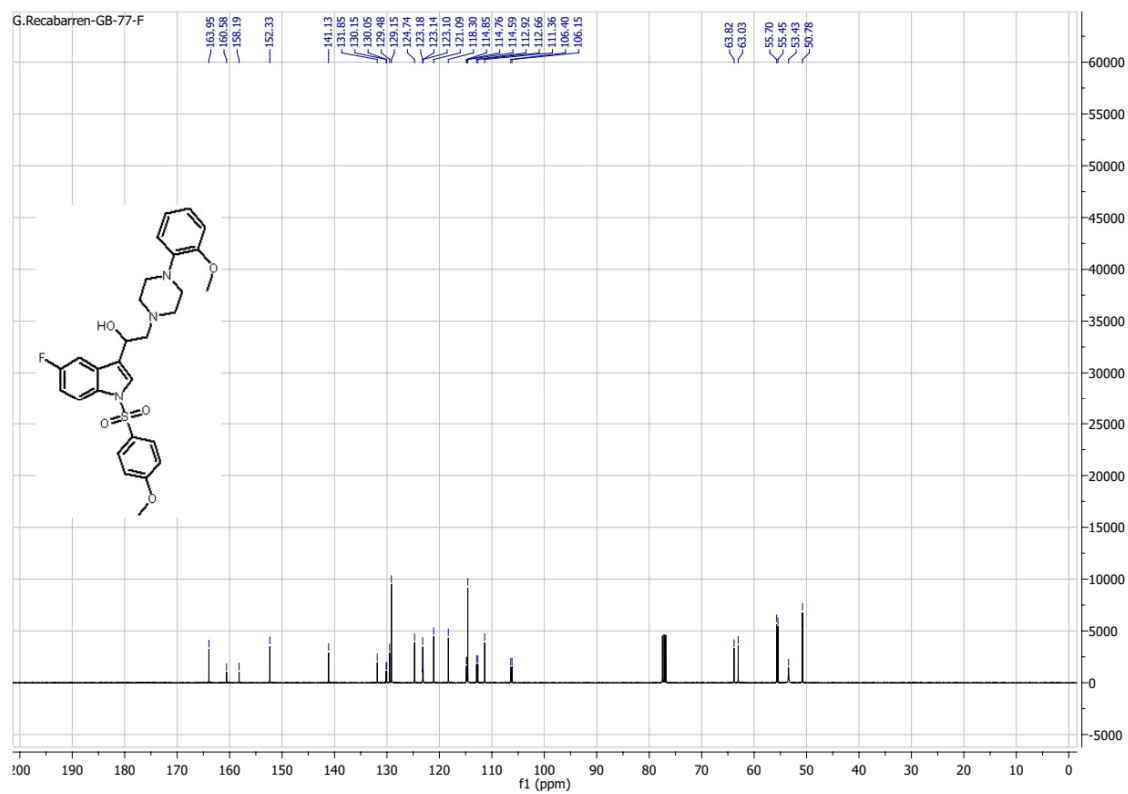

$^{19}\text{F}$ -NMR (376.5 MHz,  $\text{CDCl}_3$ ) for **4h**

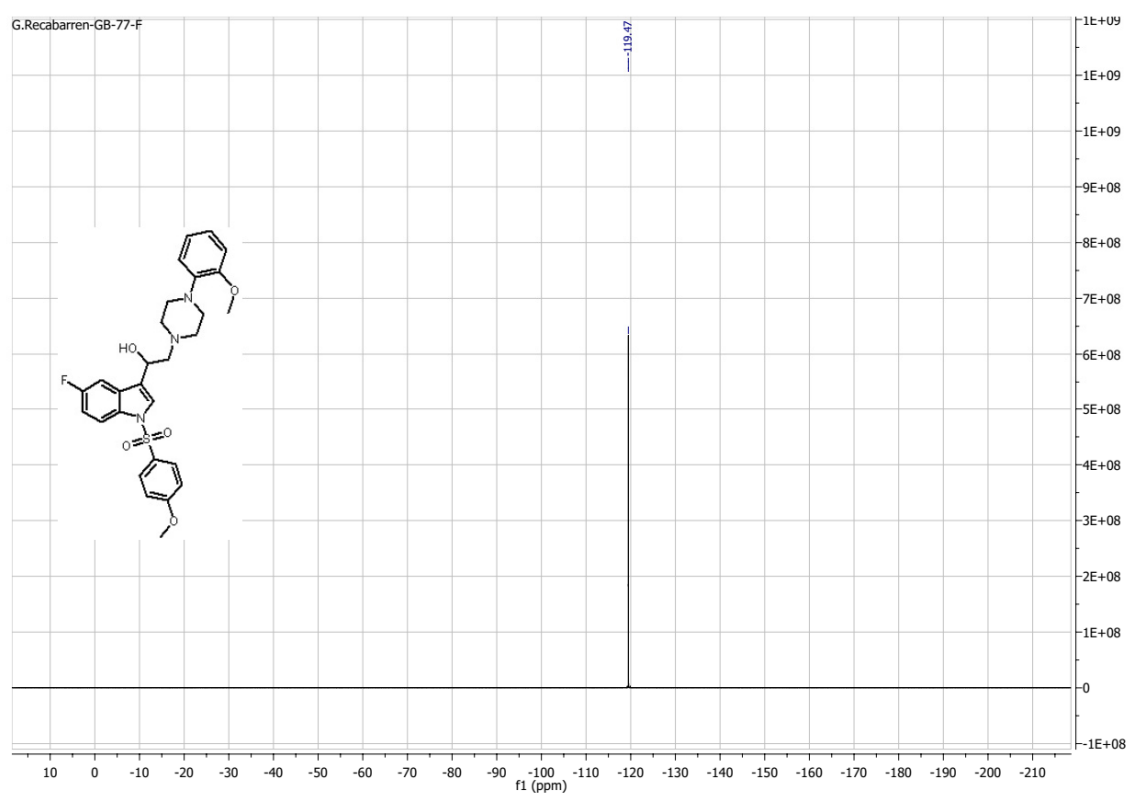

<sup>1</sup>H-NMR (400.1 MHz, CDCl<sub>3</sub>) for **4i**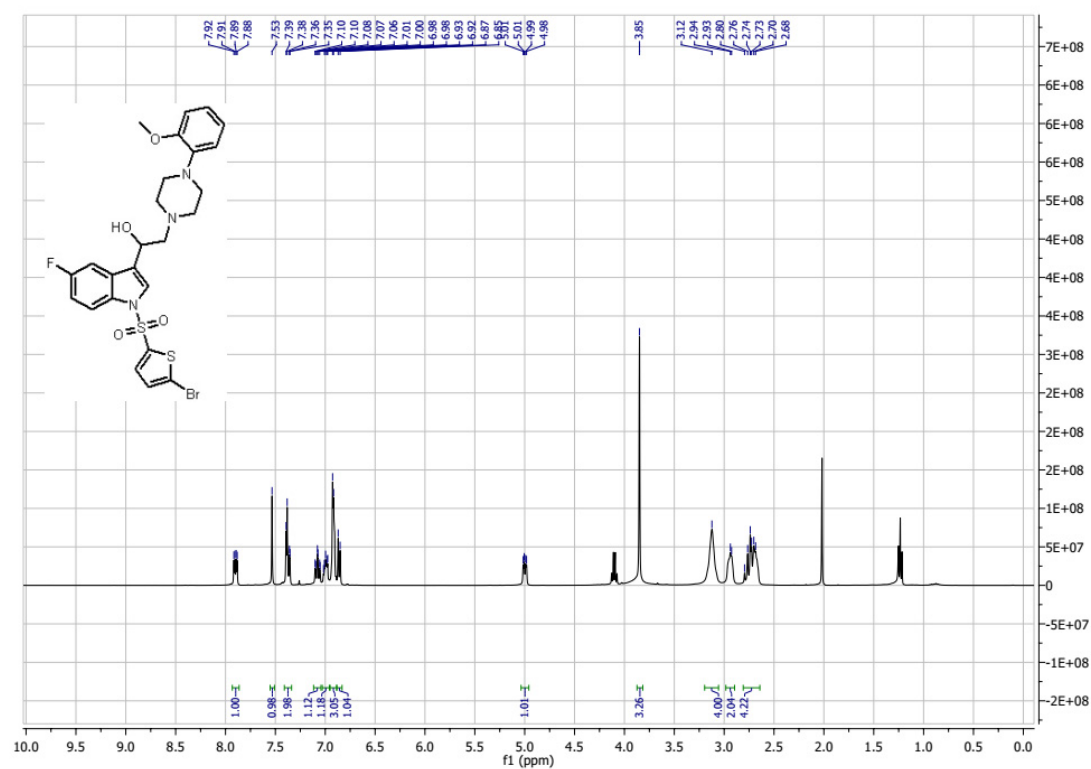 $^{13}\text{C}$ -NMR (100.6 MHz,  $\text{CDCl}_3$ ) for **4i**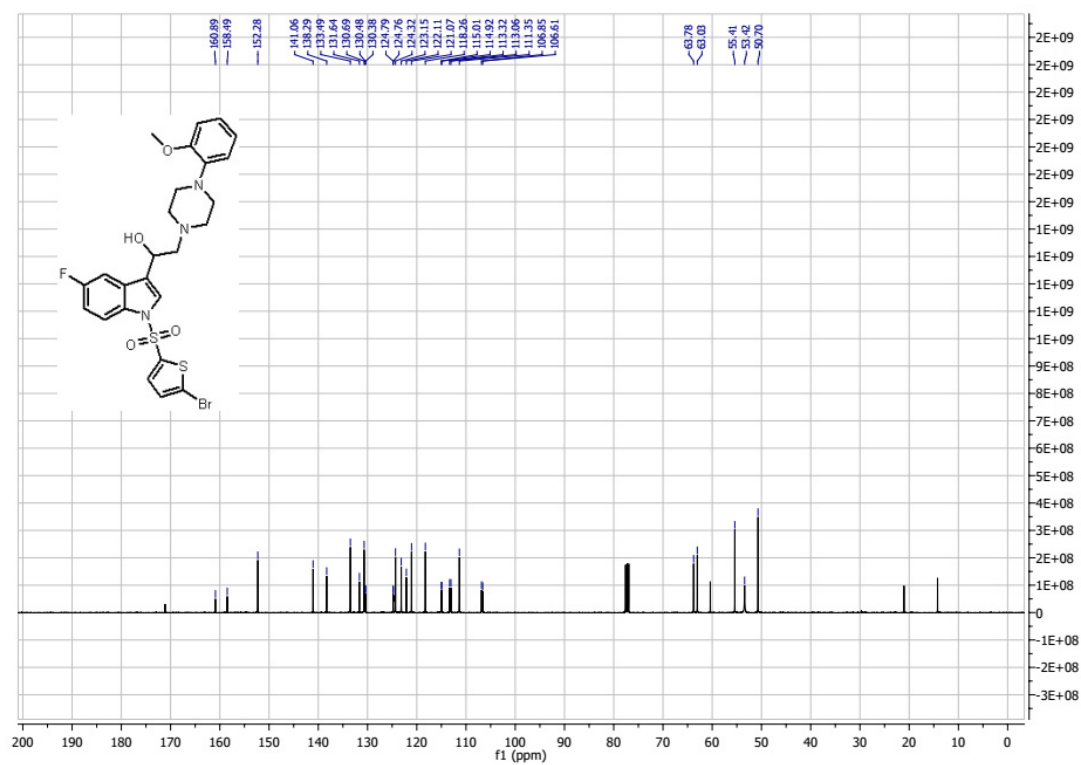

$^1\text{H}$ -NMR (400.1 MHz,  $\text{CDCl}_3$ ) for **4j**

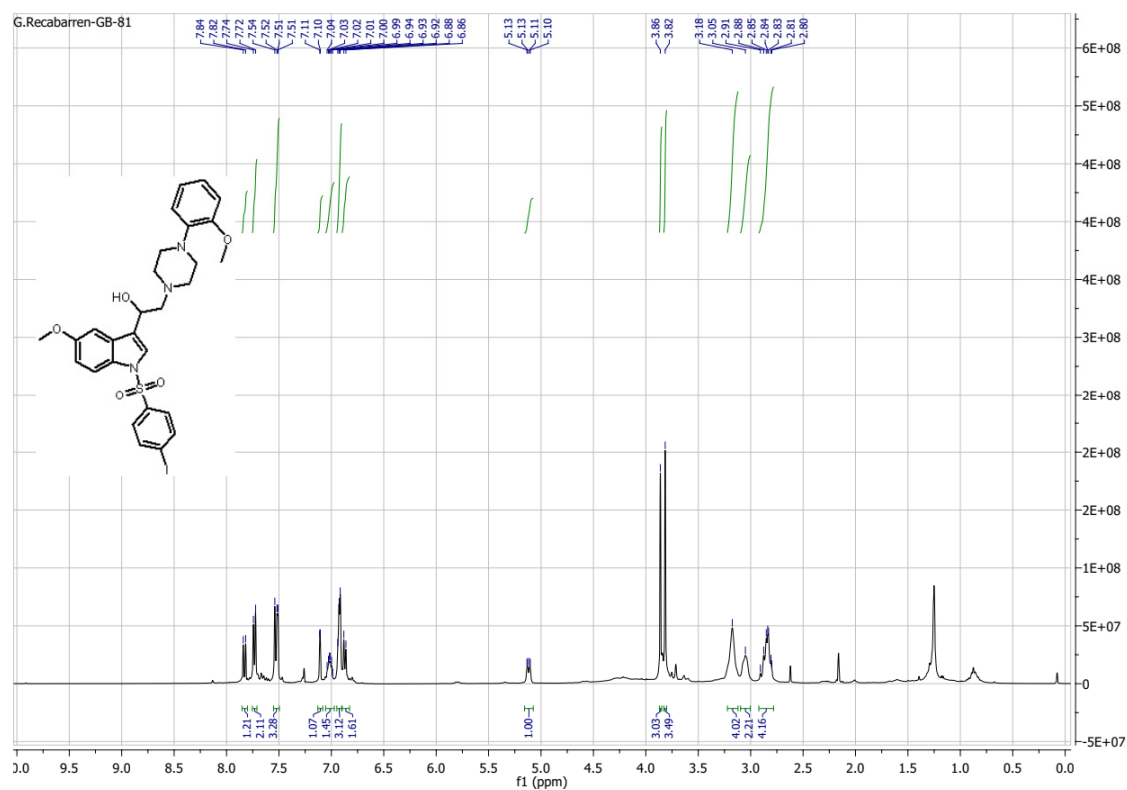

$^{13}\text{C}$ -NMR (100.6 MHz,  $\text{CDCl}_3$ ) for **4j**

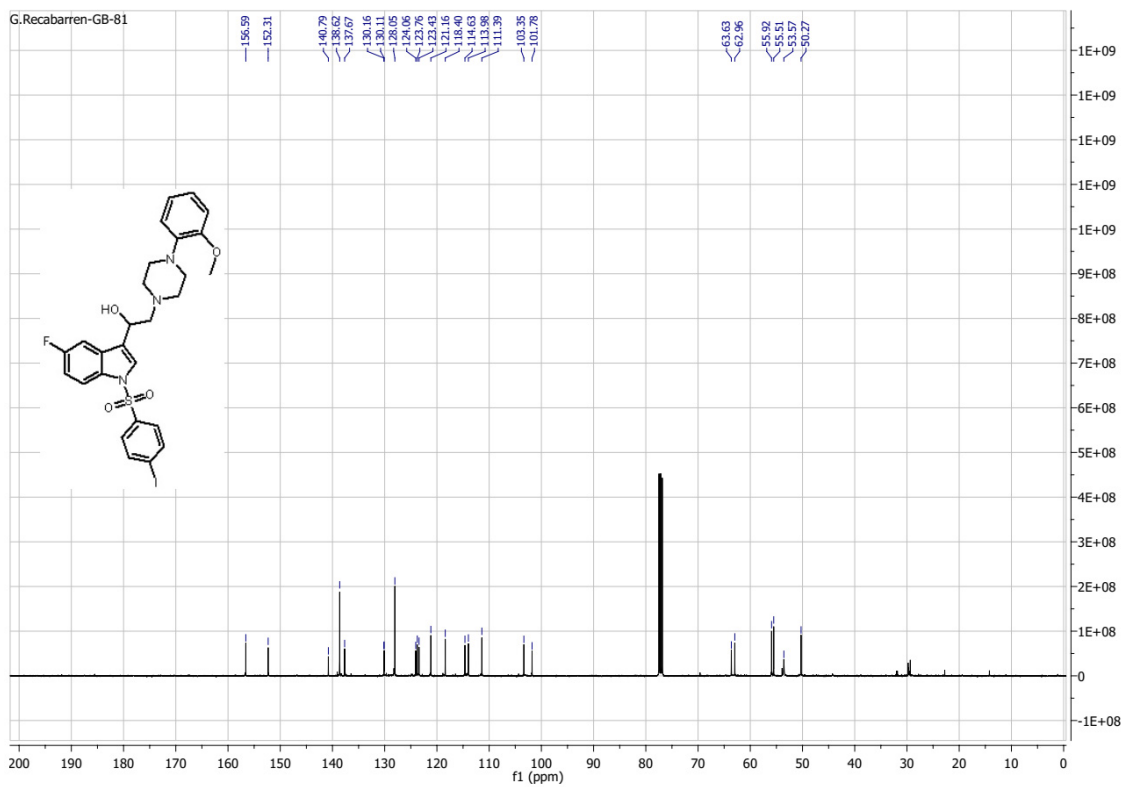

$^1\text{H}$ -NMR (400.1 MHz, DMSO- $d_6$ ) for **4k**

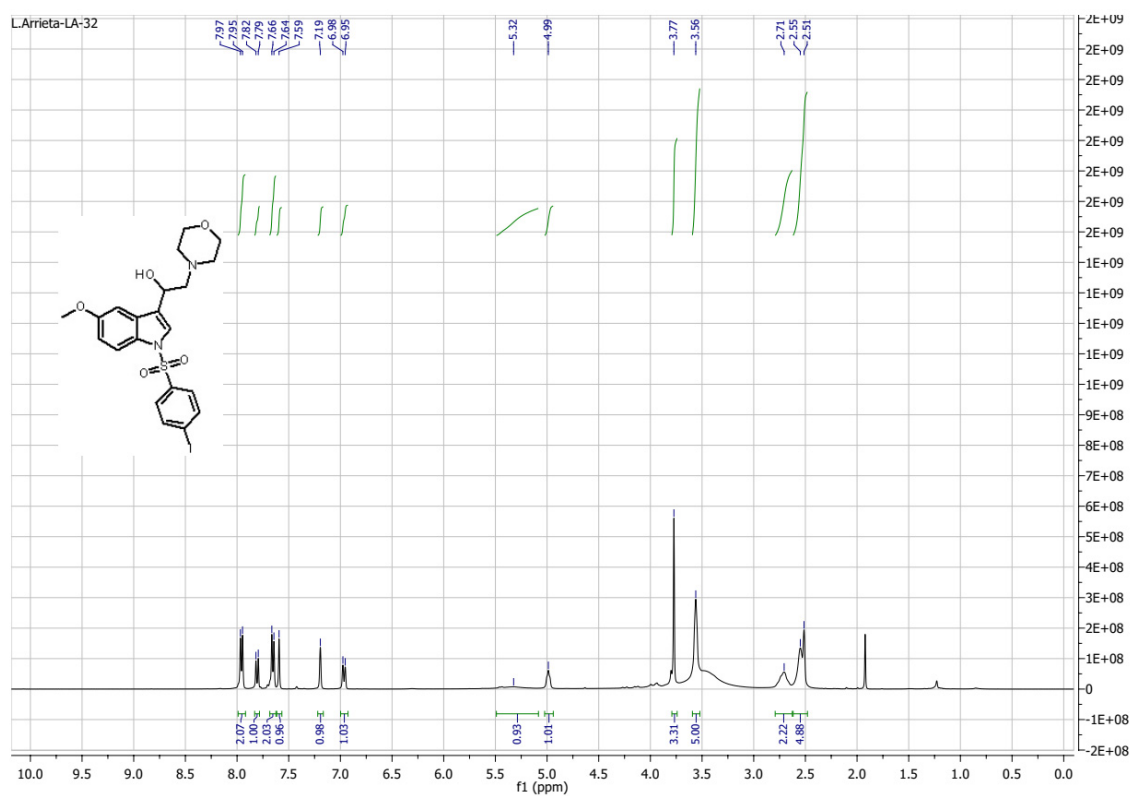

$^{13}\text{C}$ -NMR (100.6 MHz, DMSO- $d_6$ ) for **4k**

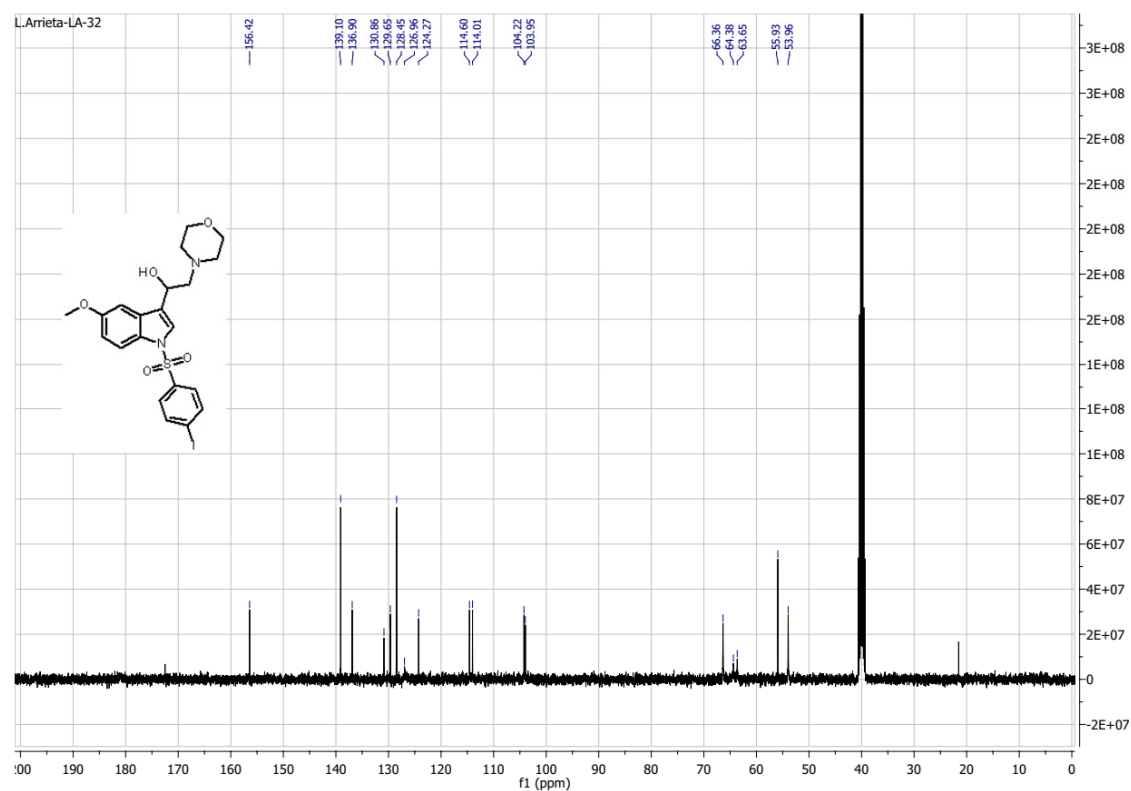



$^1\text{H}$ -NMR (400.1 MHz,  $\text{CDCl}_3$ ) for **41**

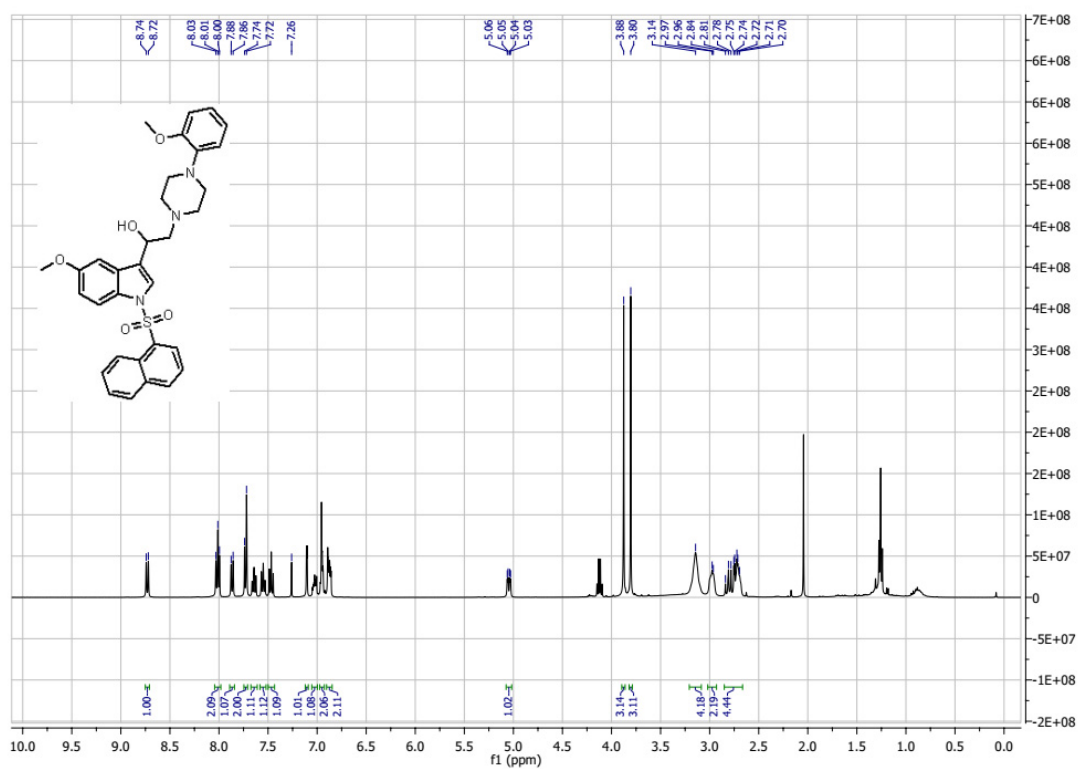

$^{13}\text{C}$ -NMR (100.6 MHz,  $\text{CDCl}_3$ ) for **41**

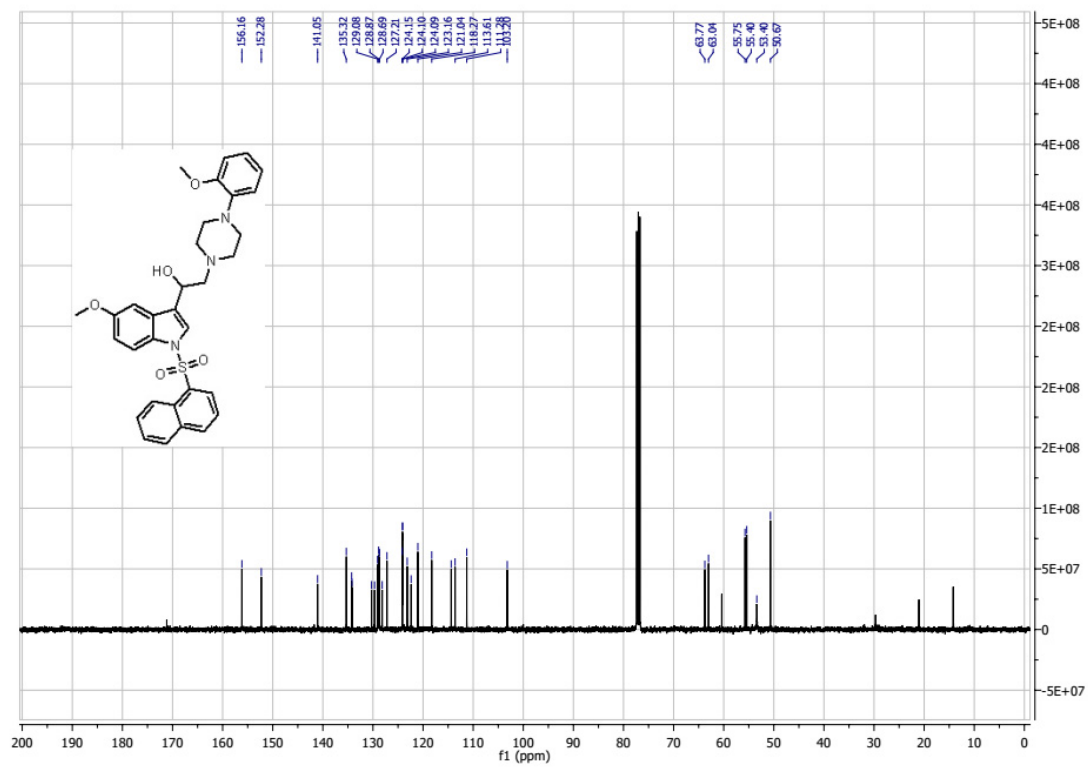

$^1\text{H}$ -NMR (400.1 MHz, DMSO- $d_6$ ) for **4m**

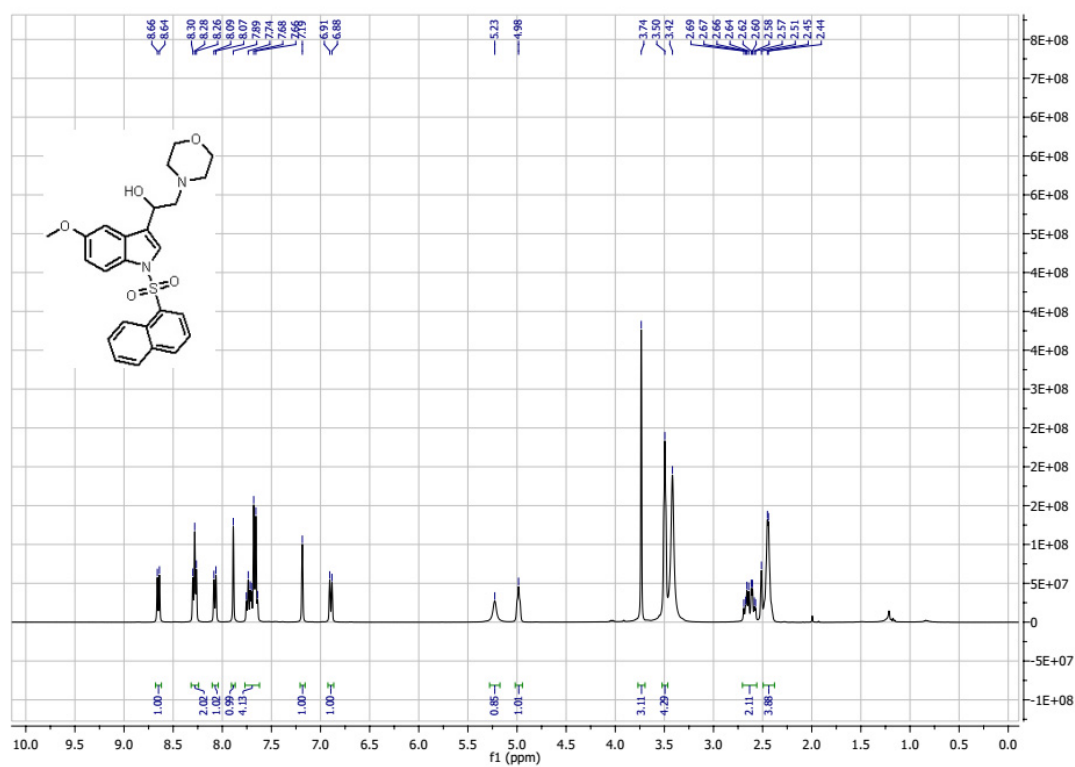

$^{13}\text{C}$ -NMR (100.6 MHz, DMSO- $d_6$ ) for **4m**

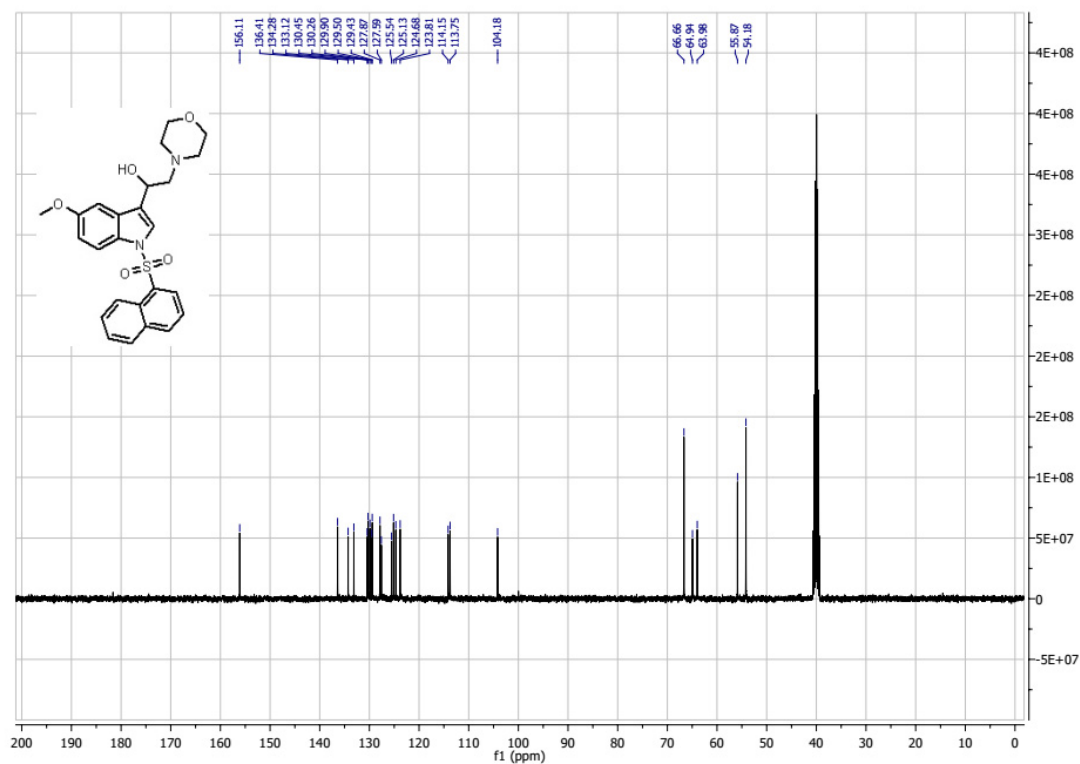

$^1\text{H}$ -NMR (400.1 MHz,  $\text{CDCl}_3$ ) for **4n**

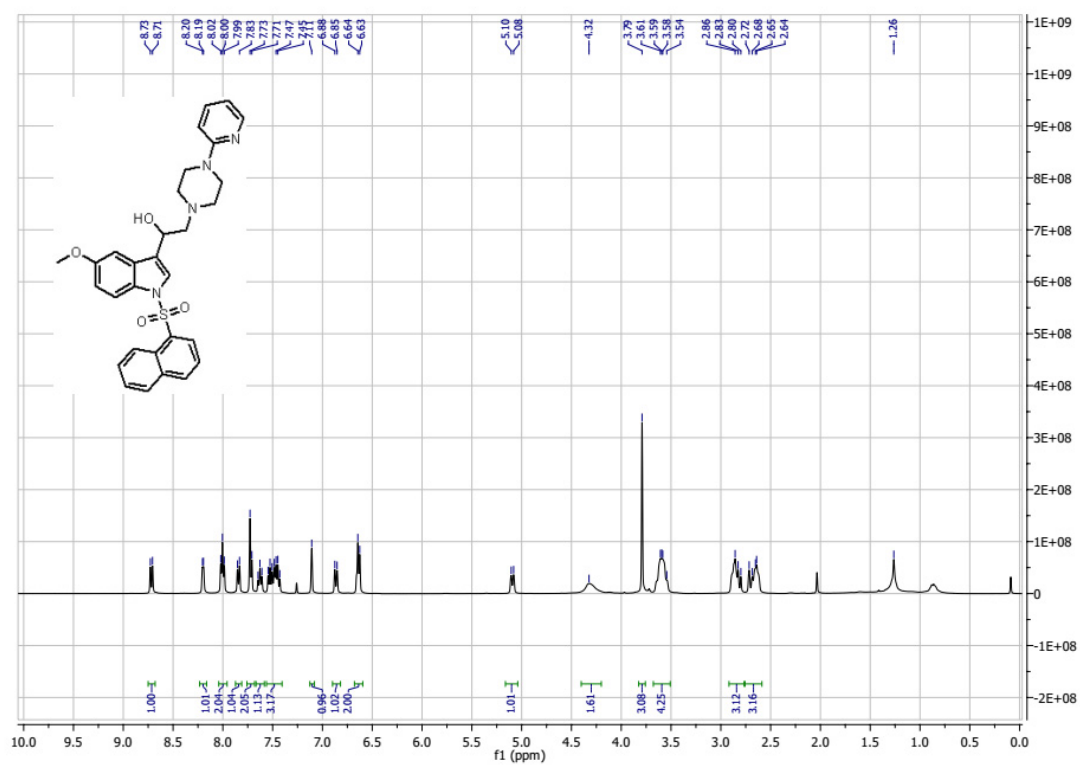

$^{13}\text{C}$ -NMR (100.6 MHz,  $\text{CDCl}_3$ ) for **4n**

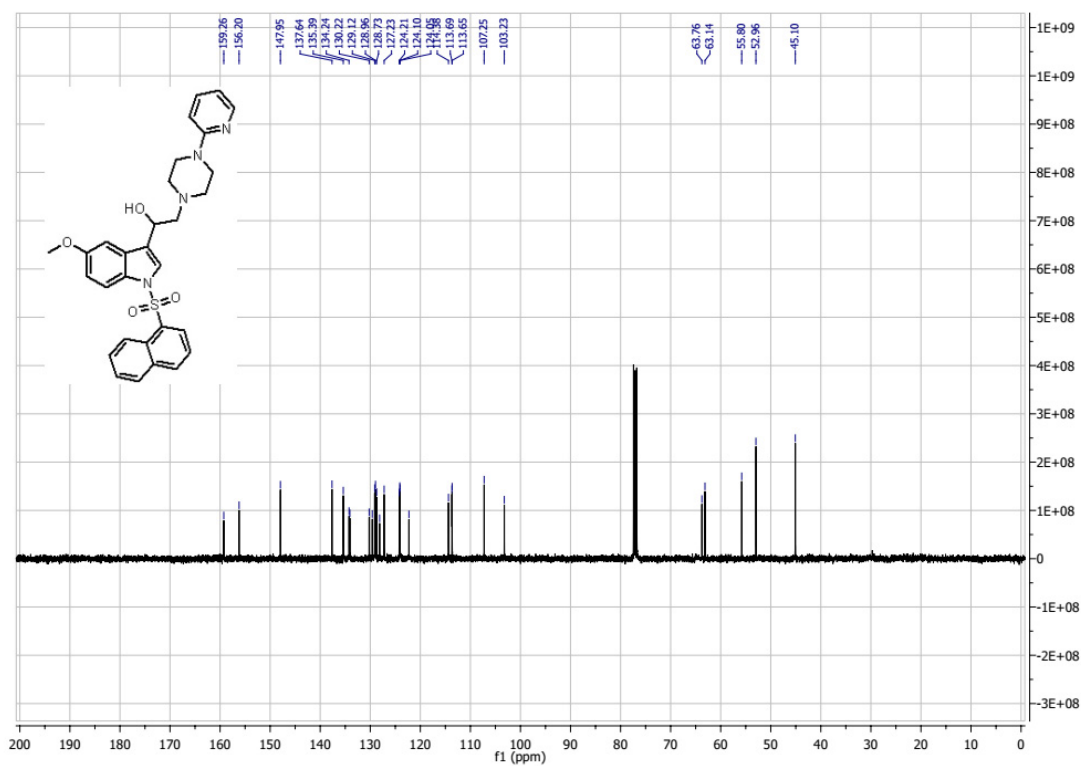

$^1\text{H}$ -NMR (400.1 MHz,  $\text{CDCl}_3$ ) for **4o**

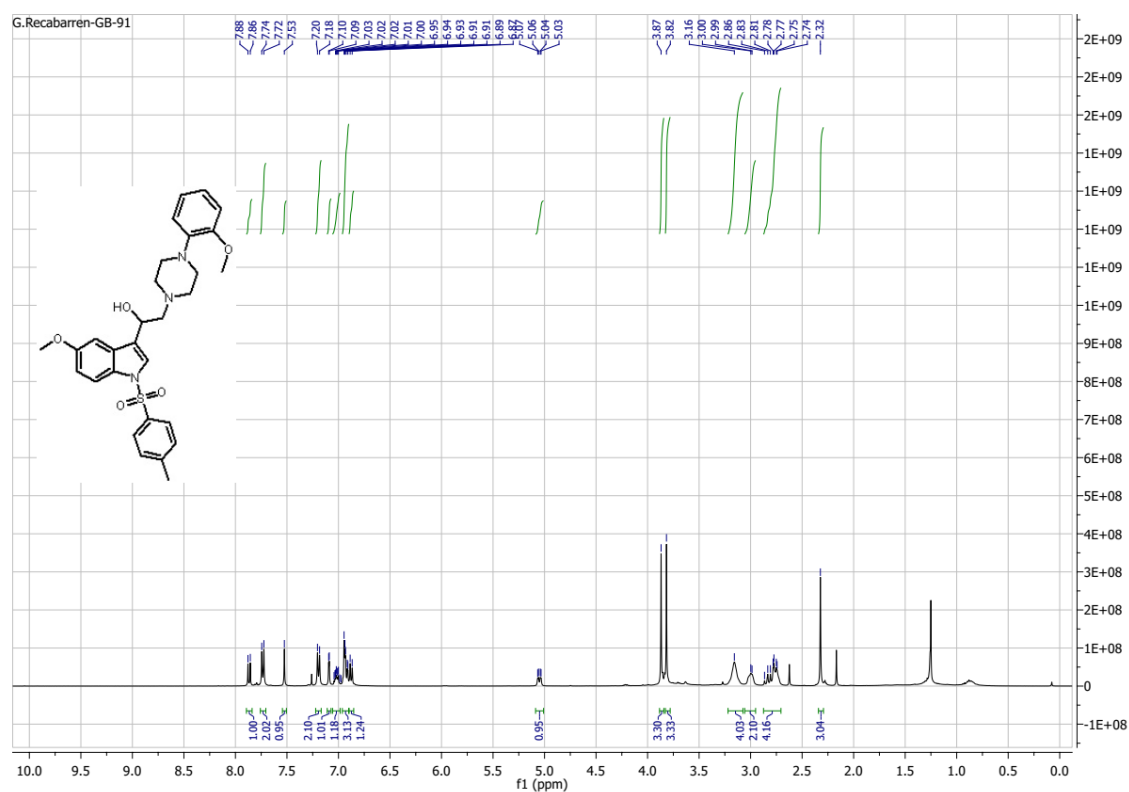

$^{13}\text{C}$ -NMR (100.6 MHz,  $\text{CDCl}_3$ ) for **4o**

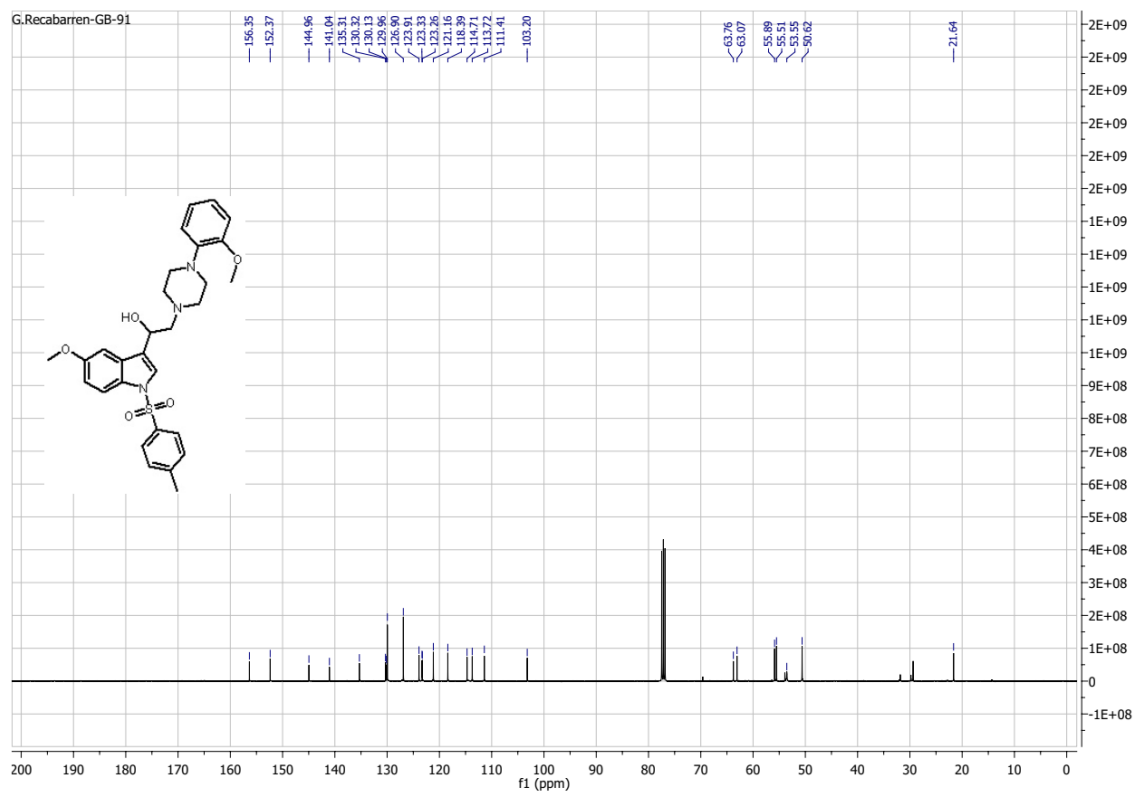

$^1\text{H}$ -NMR (400.1 MHz,  $\text{CDCl}_3$ ) for **4p**

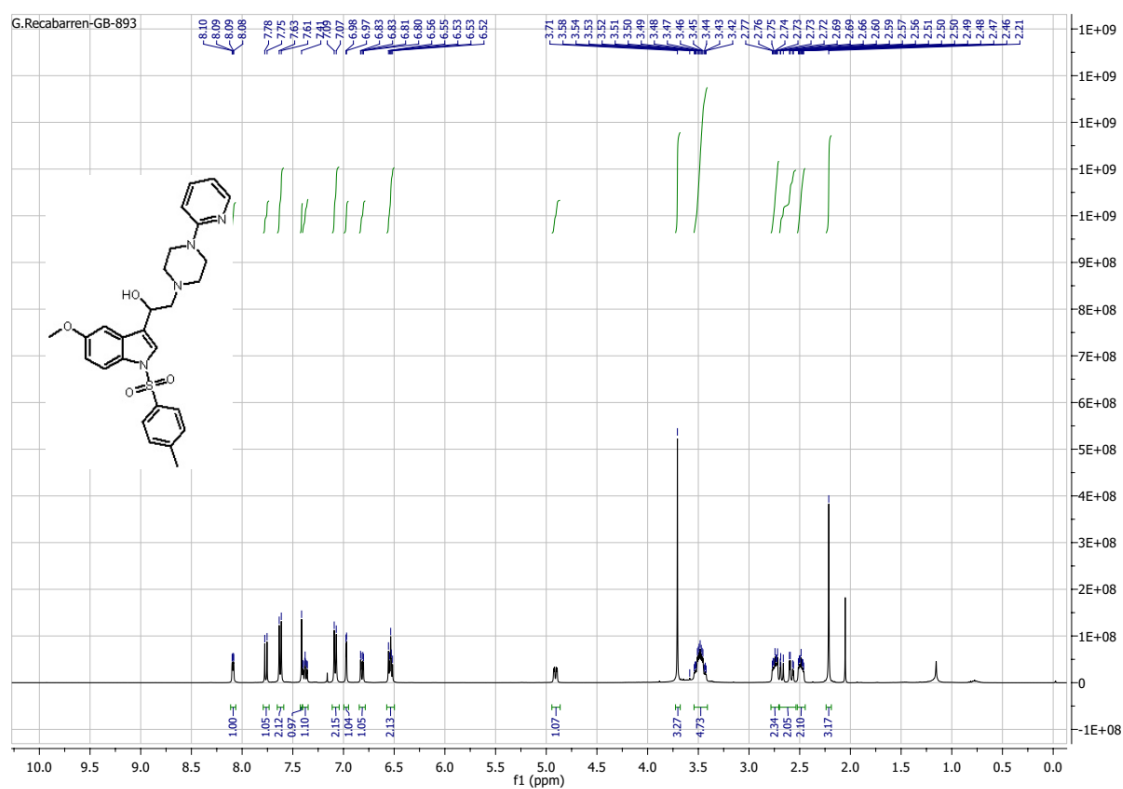

$^{13}\text{C}$ -NMR (100.6 MHz,  $\text{CDCl}_3$ ) for **4p**

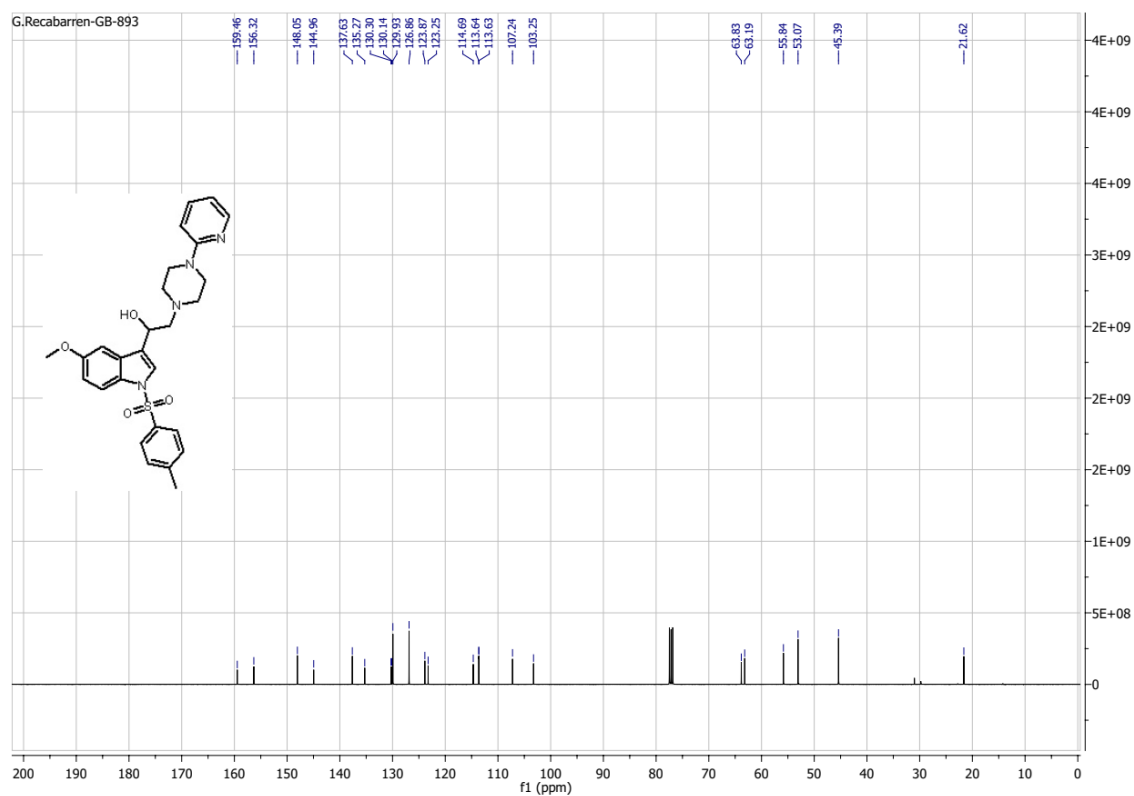

$^1\text{H}$ -NMR (400.1 MHz,  $\text{CDCl}_3$ ) for **4q**

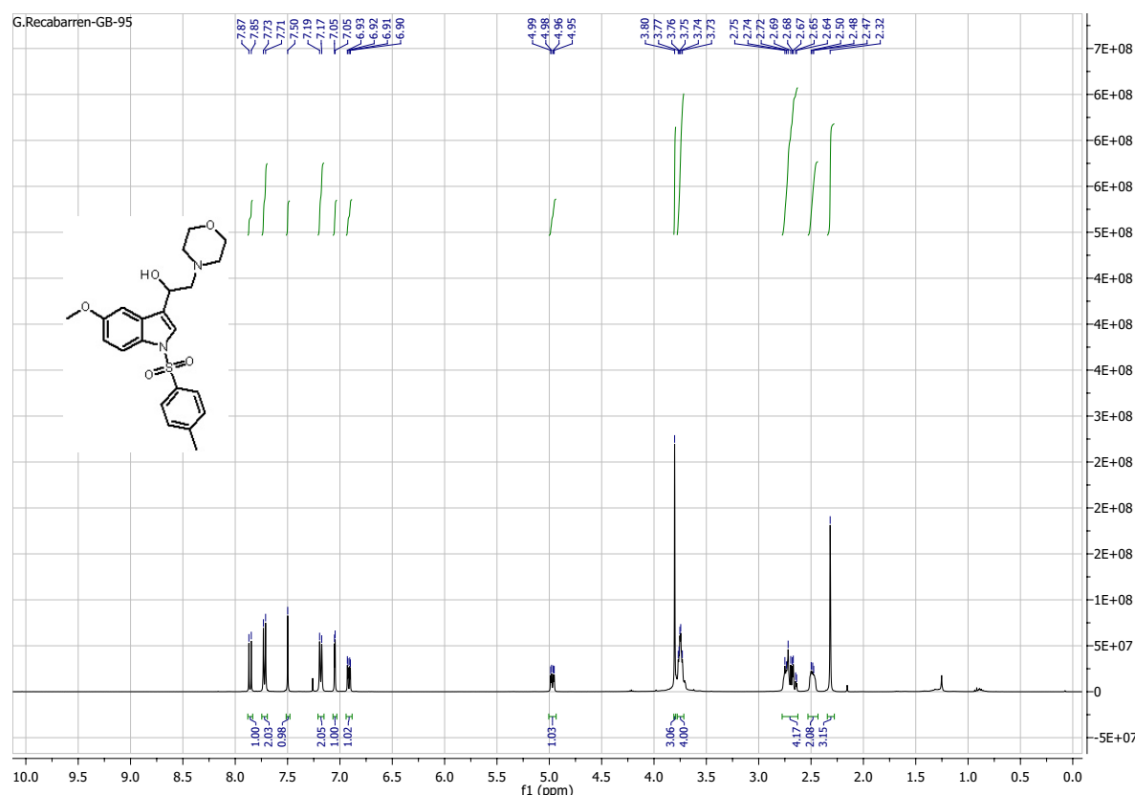

$^{13}\text{C}$ -NMR (100.6 MHz,  $\text{CDCl}_3$ ) for **4q**

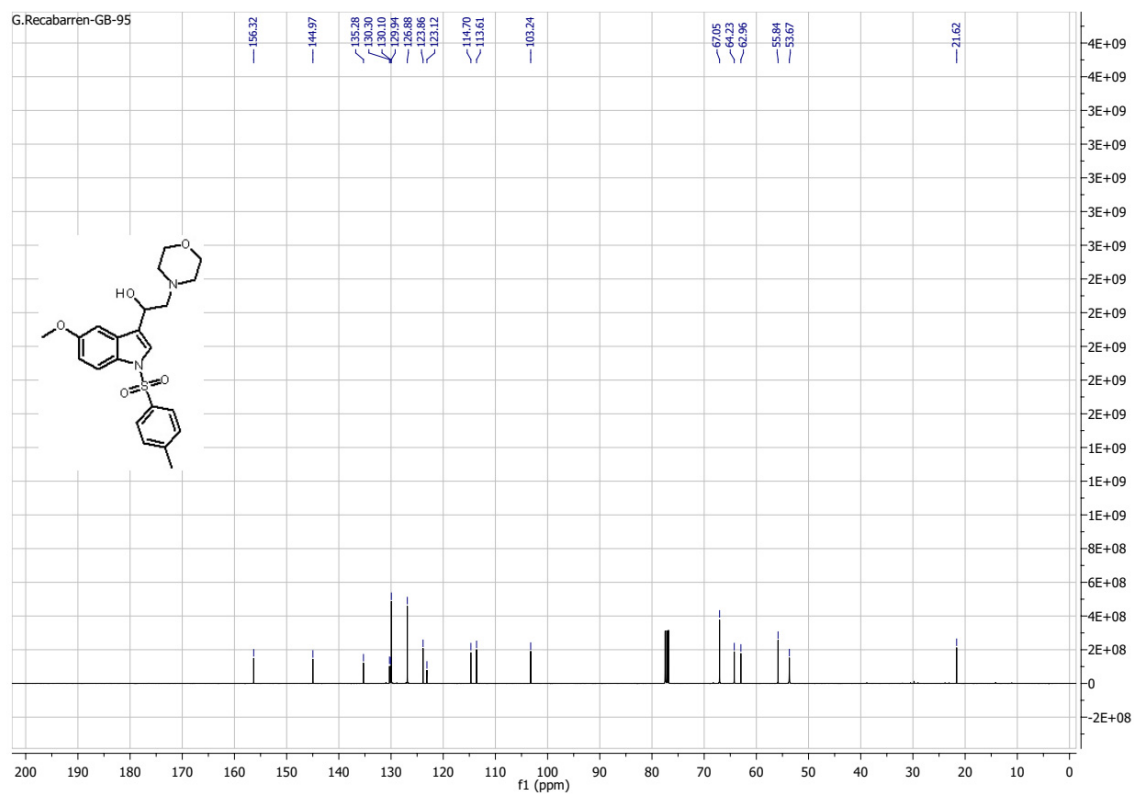

$^1\text{H}$ -NMR (400.1 MHz,  $\text{CDCl}_3$ ) for **4r**

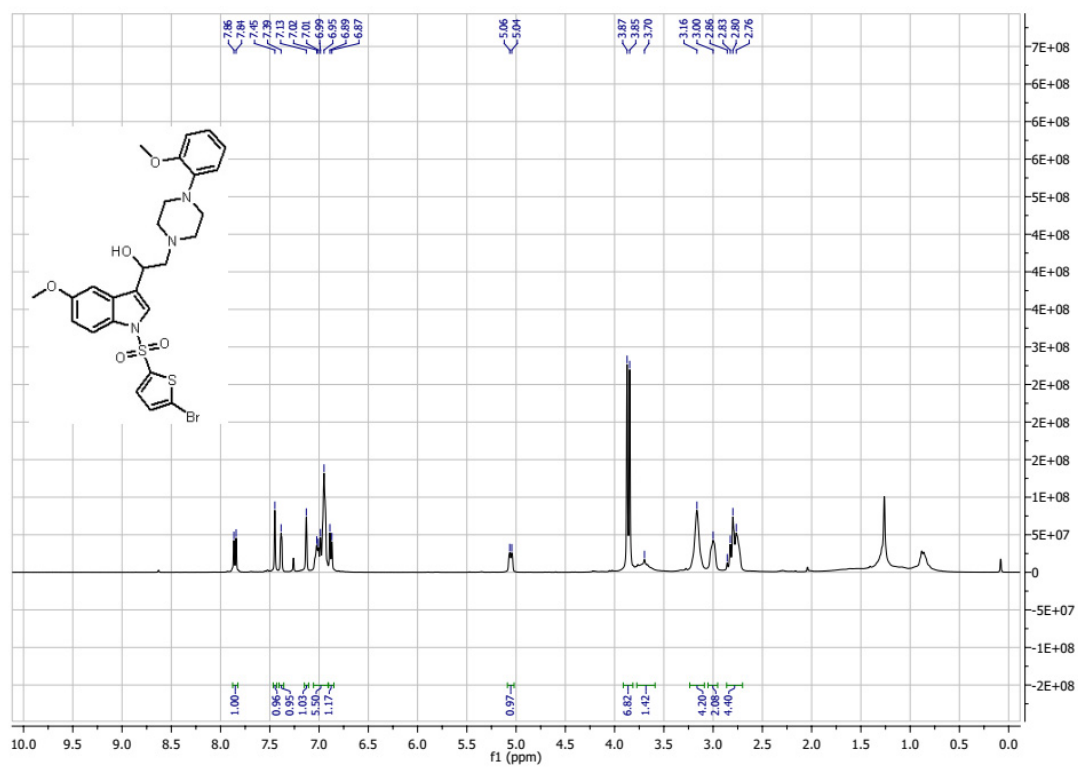

$^{13}\text{C}$ -NMR (100.6 MHz,  $\text{CDCl}_3$ ) for **4r**

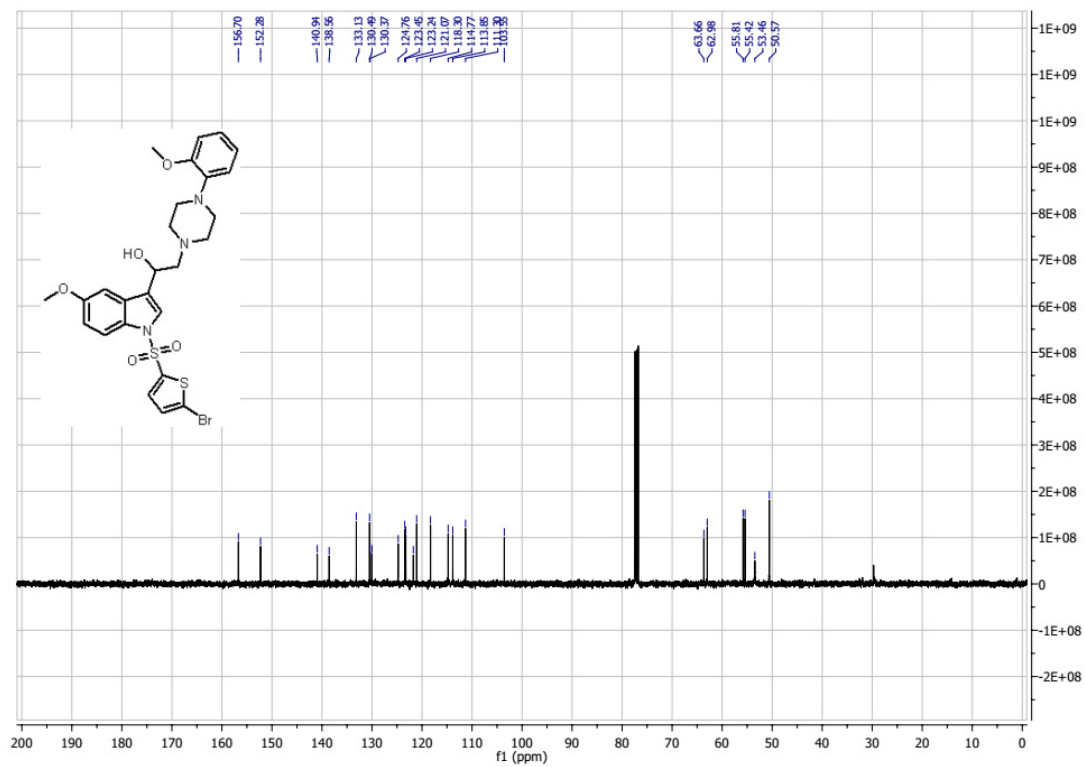

$^1\text{H}$ -NMR (400.1 MHz,  $\text{CDCl}_3$ ) for **4s**

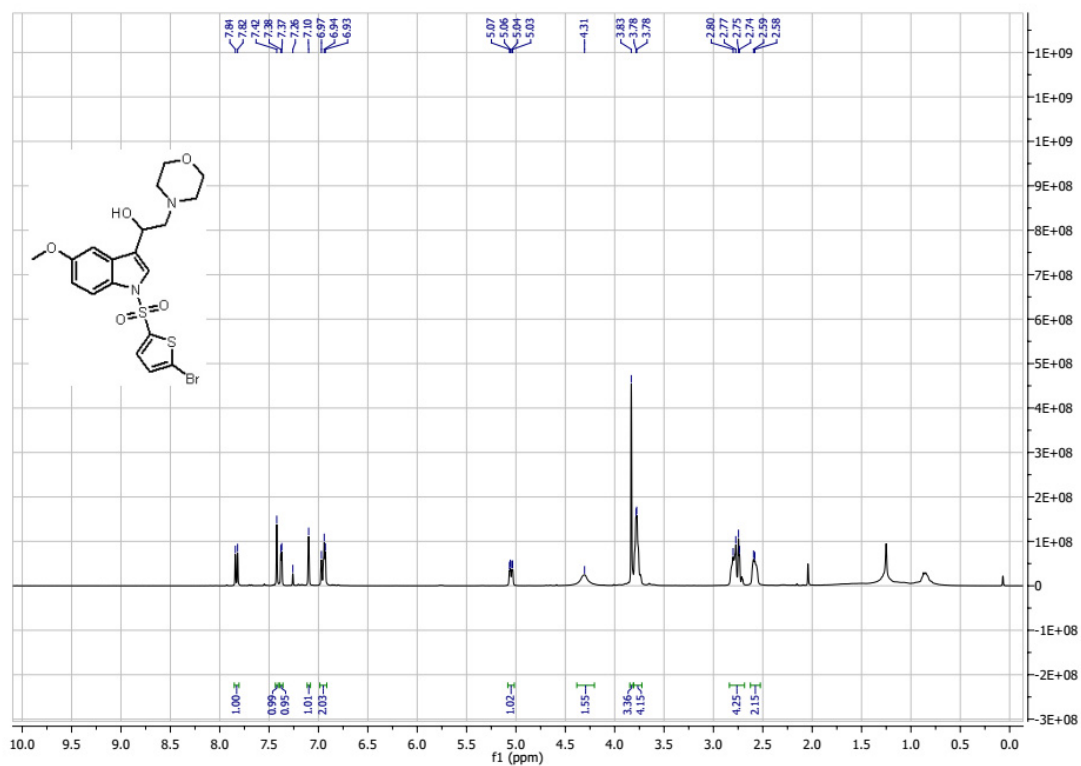

$^{13}\text{C}$ -NMR (100.6 MHz,  $\text{CDCl}_3$ ) for **4s**

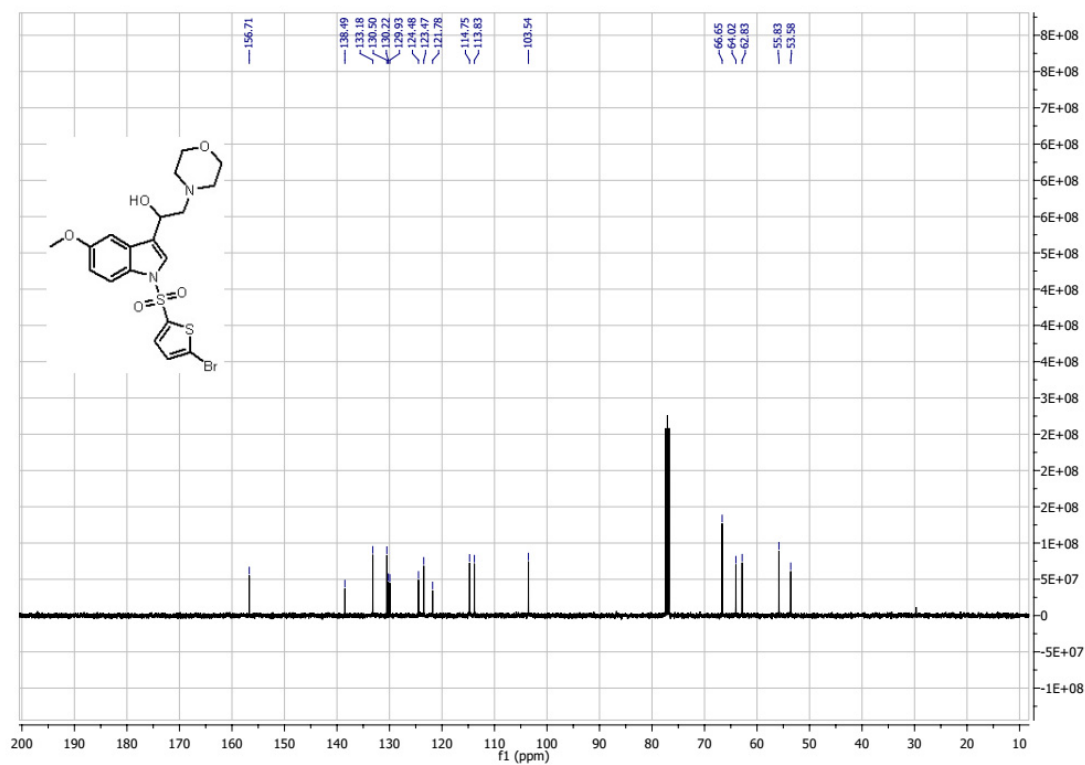



$^1\text{H}$ -NMR (400.1 MHz,  $\text{DMSO-d}_6$ ) for **4t**

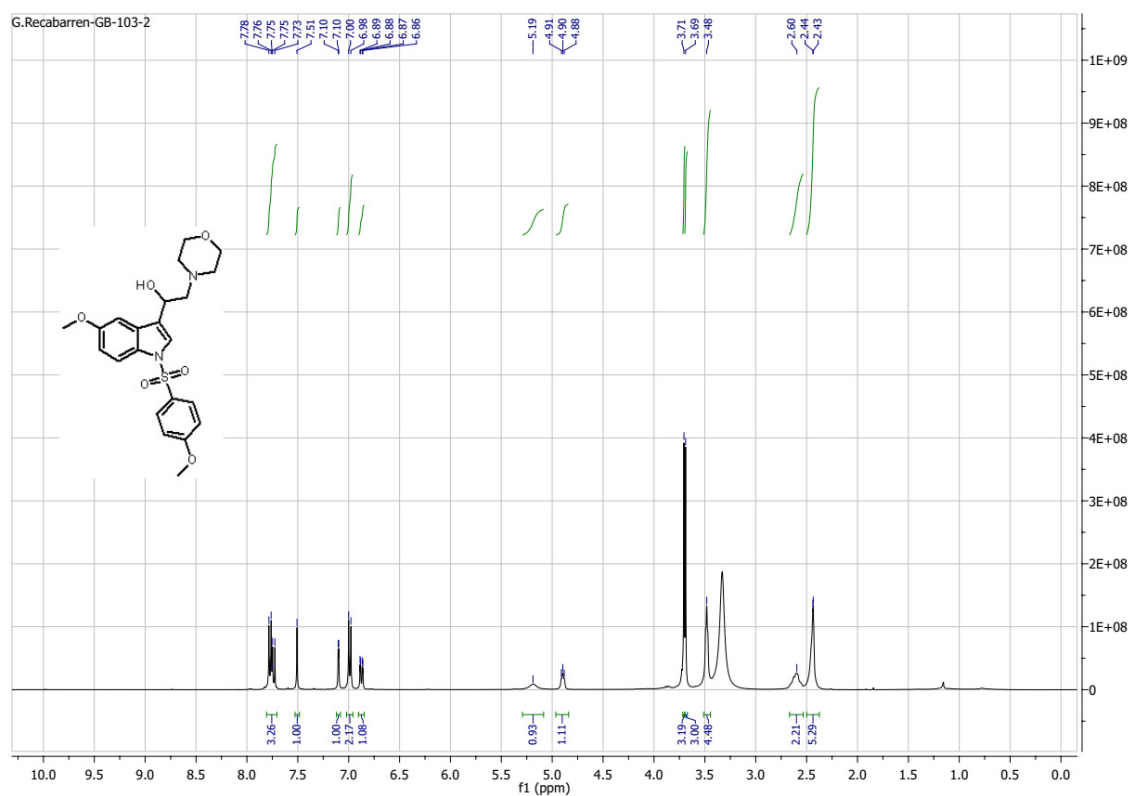

$^{13}\text{C}$ -NMR (100.6 MHz,  $\text{DMSO-d}_6$ ) for **4t**

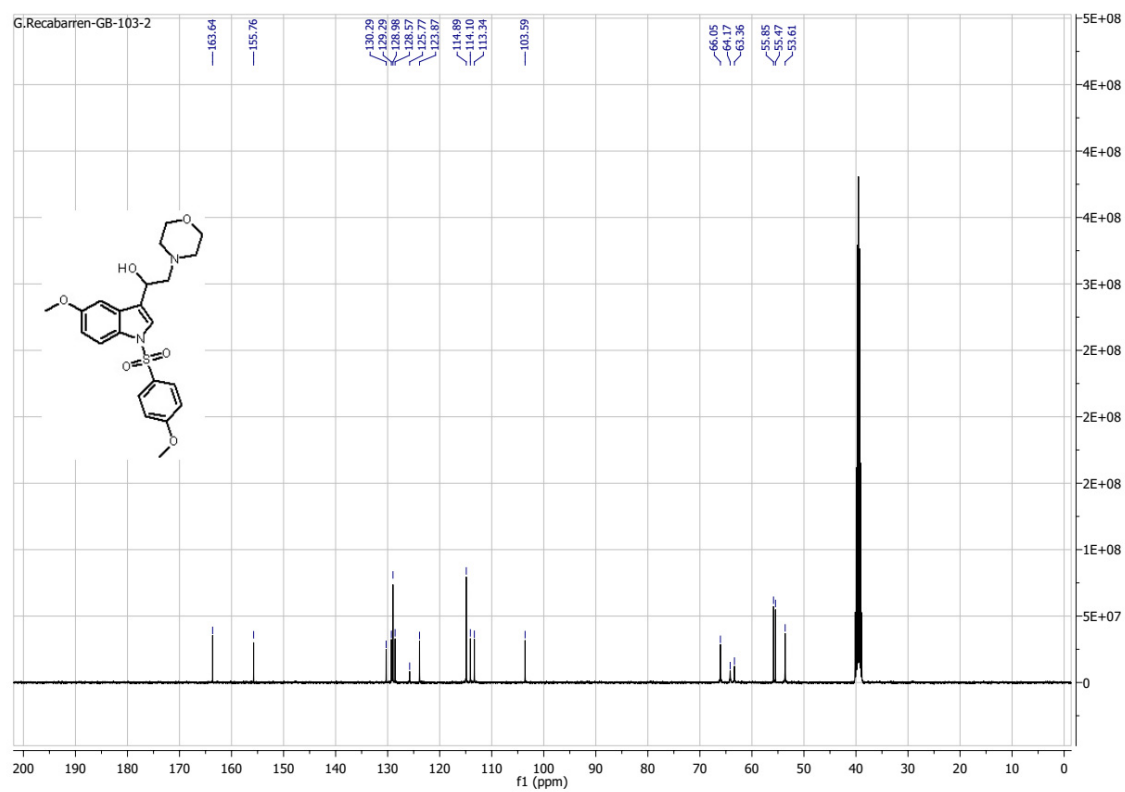

$^1\text{H}$ -NMR (400.1 MHz,  $\text{CDCl}_3$ ) for **4u**

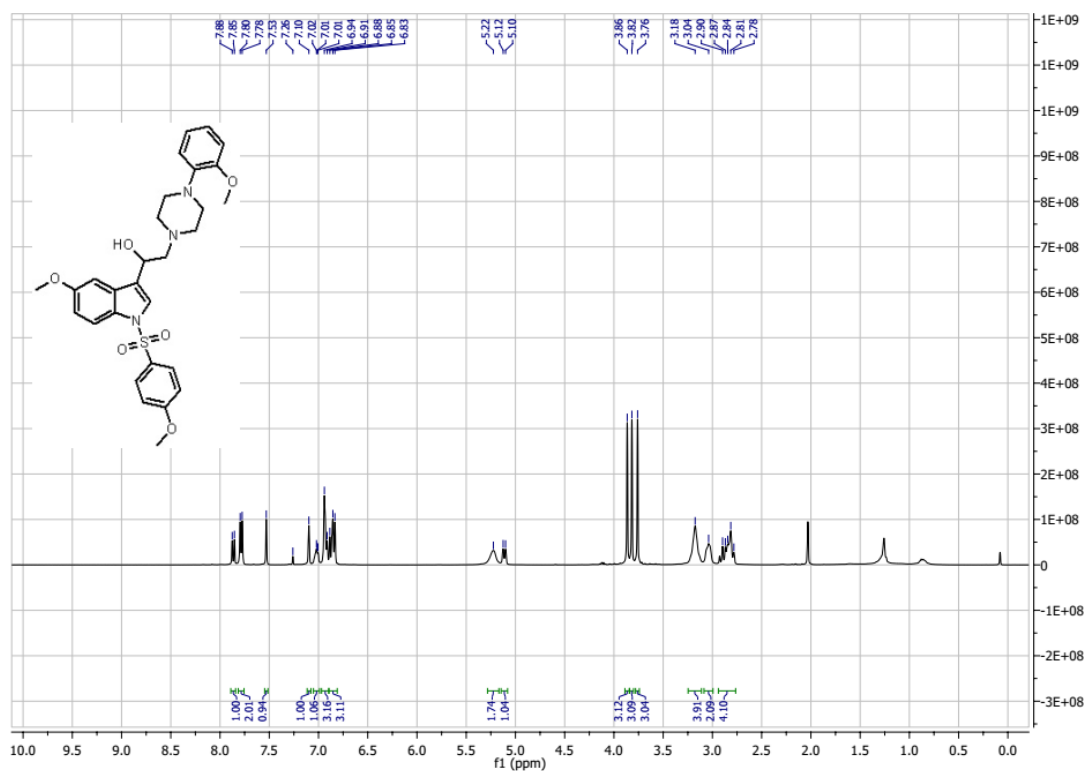

$^{13}\text{C}$ -NMR (100.6 MHz,  $\text{CDCl}_3$ ) for **4u**

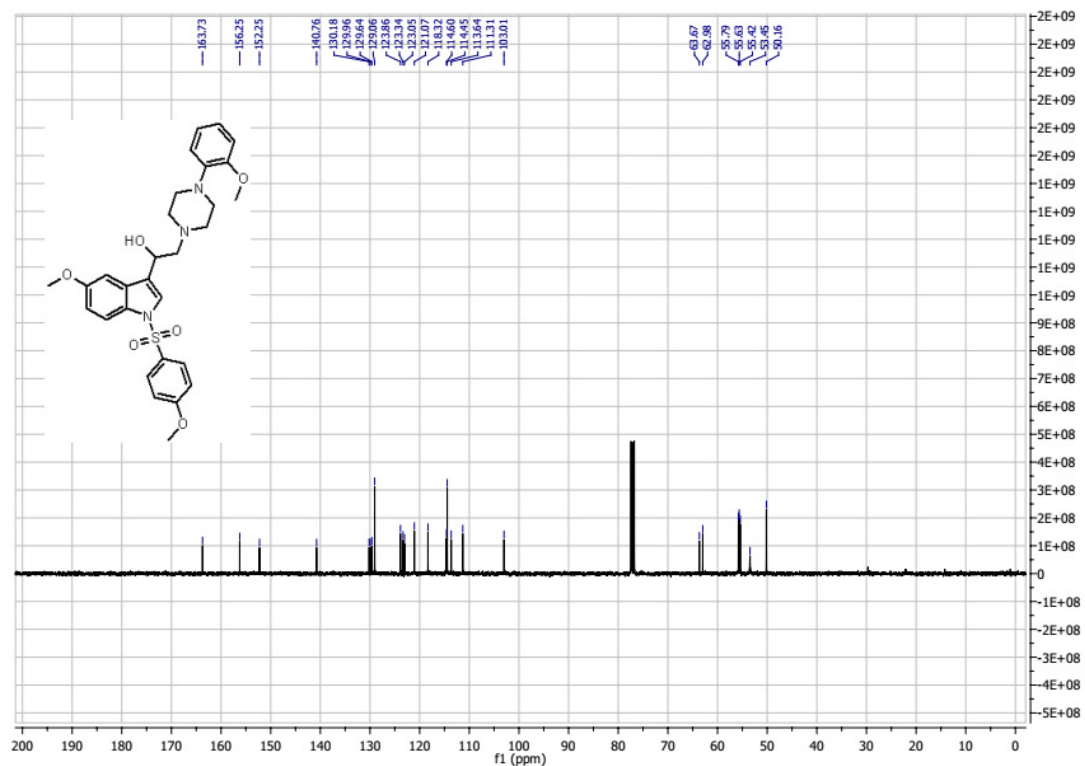

$^1\text{H}$ -NMR (400.1 MHz,  $\text{CDCl}_3$ ) for **4v**

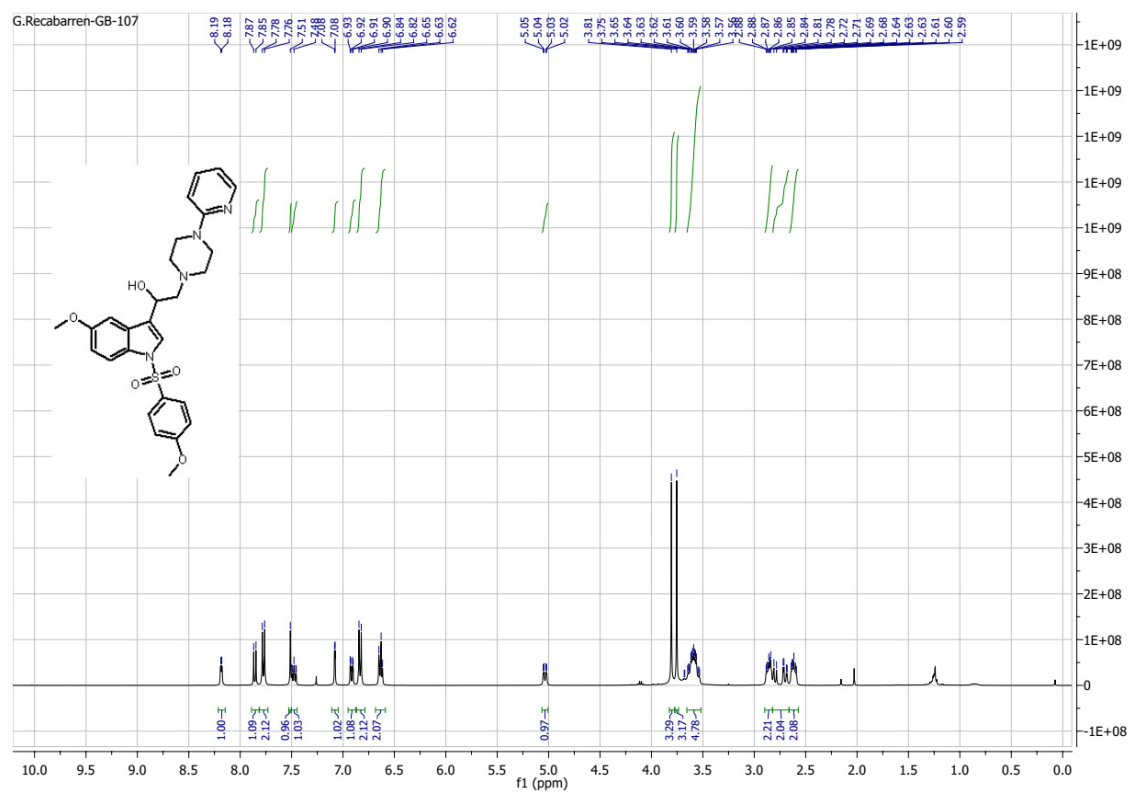

$^{13}\text{C}$ -NMR (100.6 MHz,  $\text{CDCl}_3$ ) for **4v**

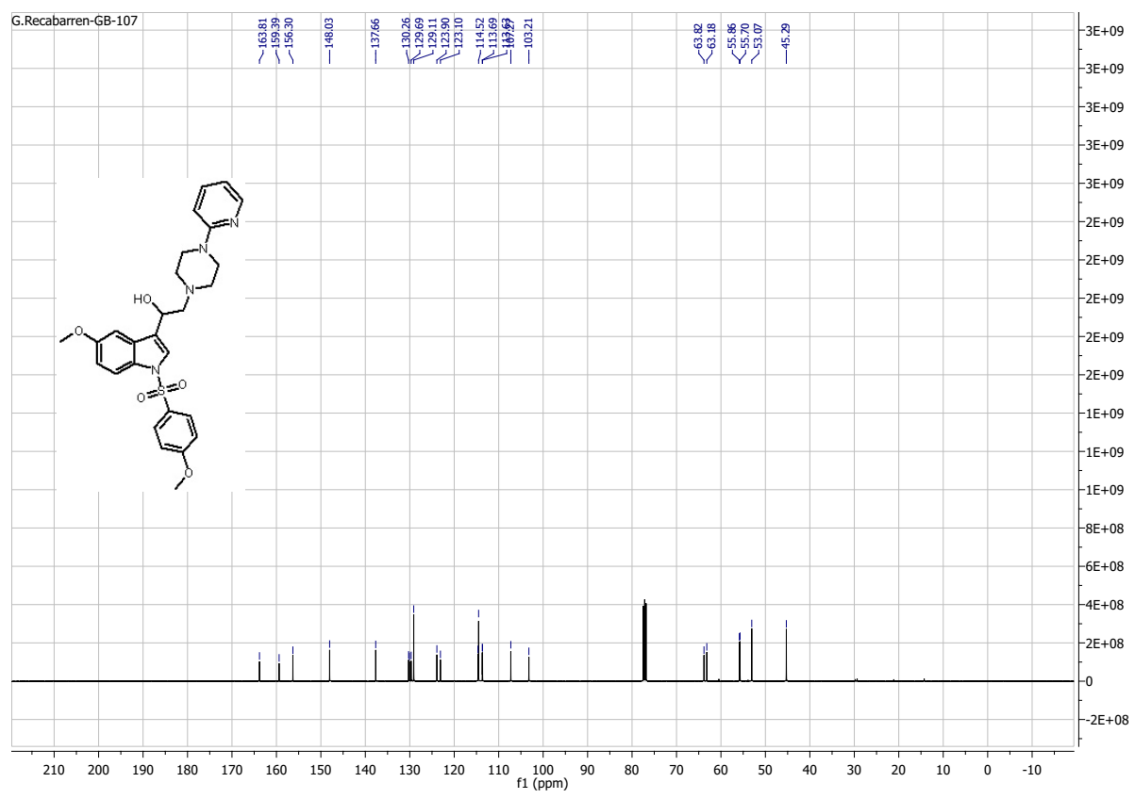

### 3. High resolution mass spectra of final compounds.

#### HRMS for **4a**

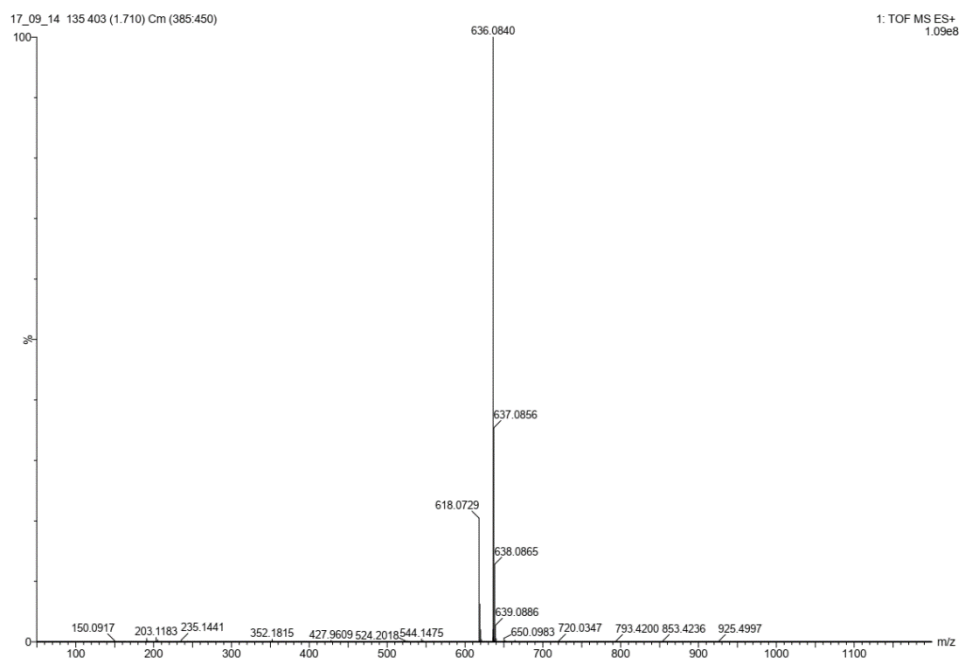

#### HRMS for **4b**

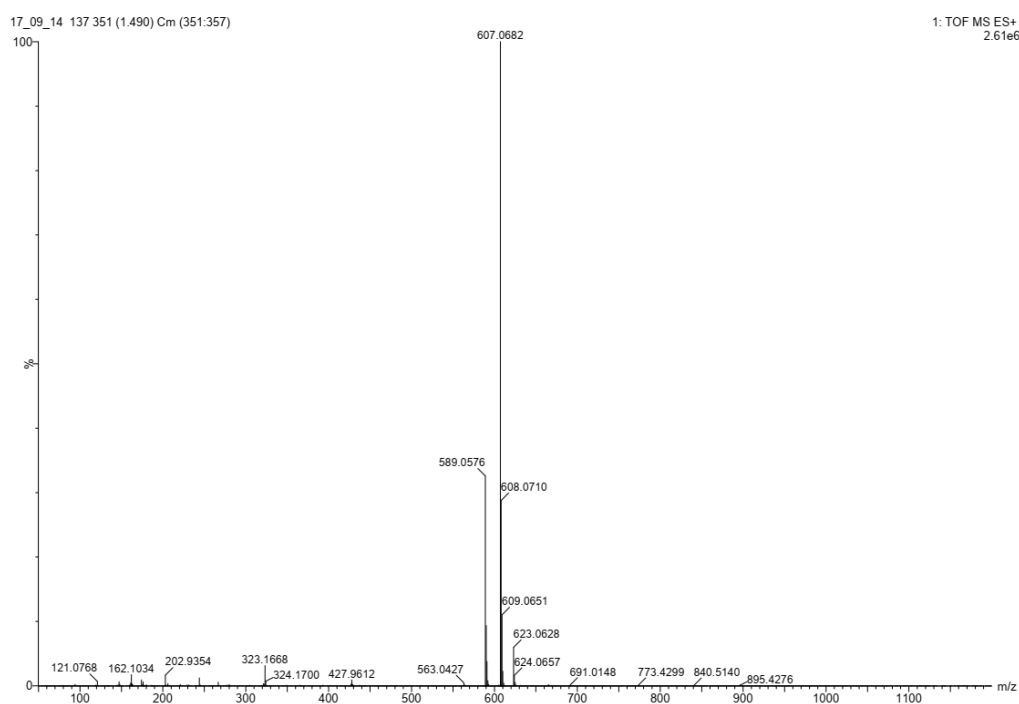

## HRMS for 4c

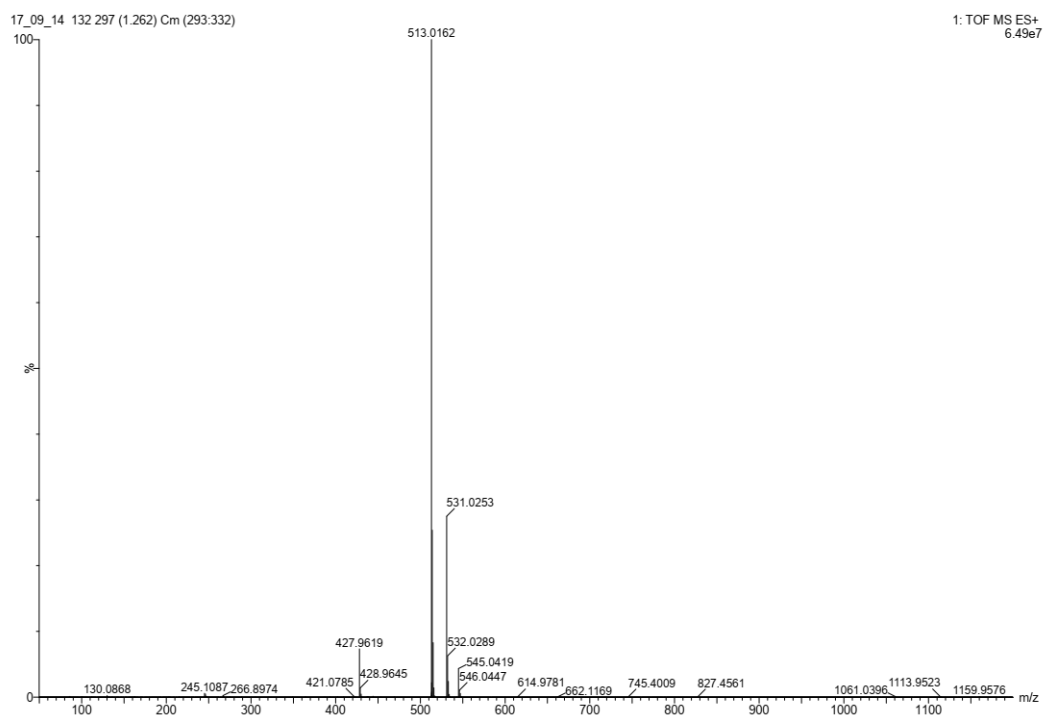

## HRMS for 4d

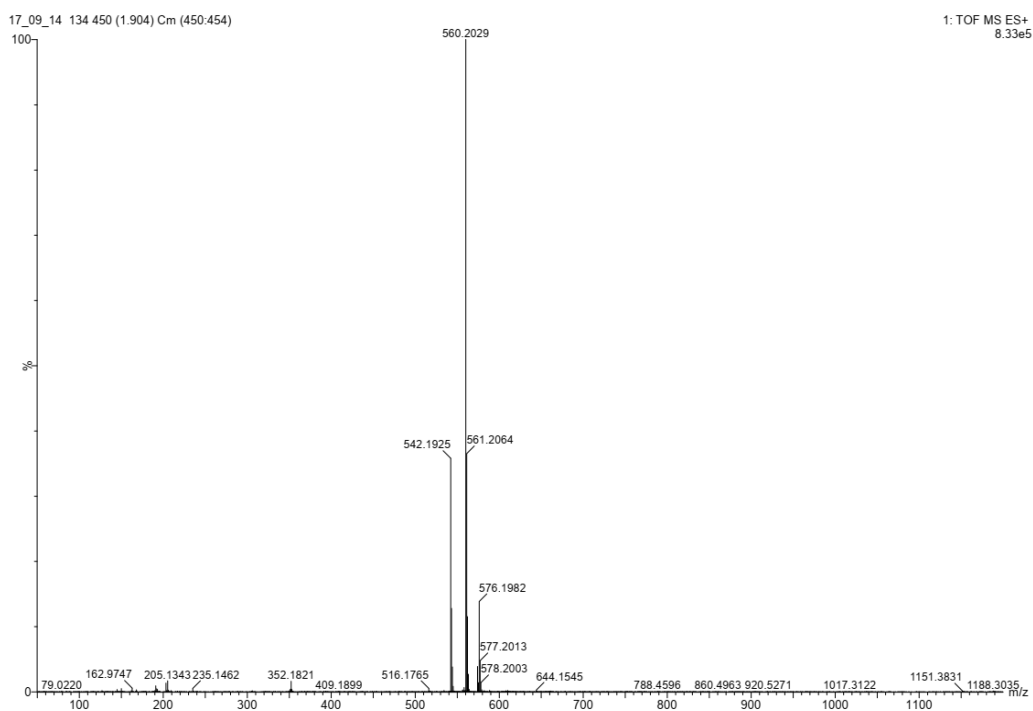

## HRMS for 4e

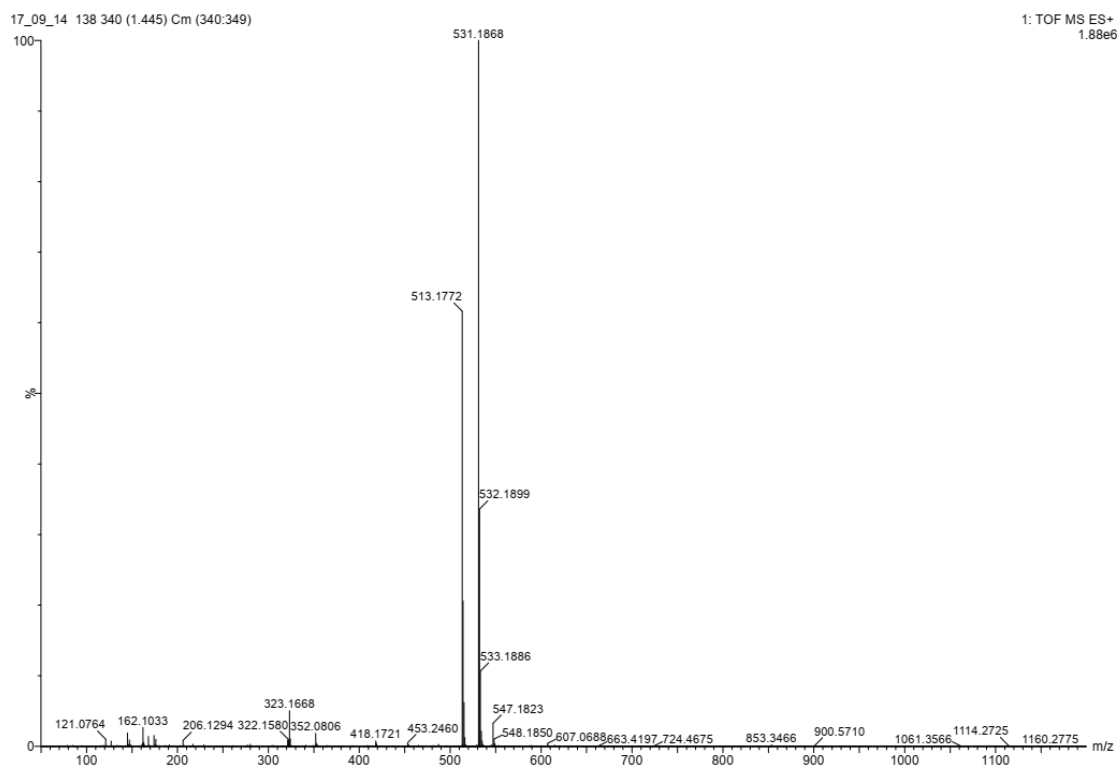

## HRMS for 4f

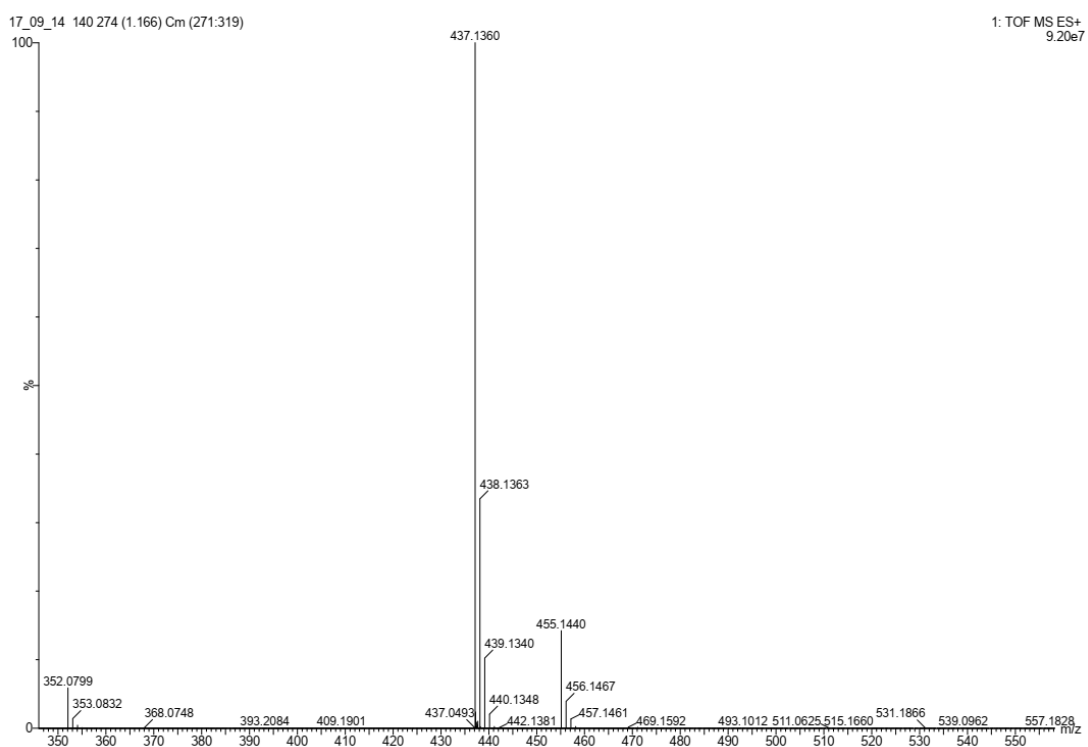

## HRMS for 4g

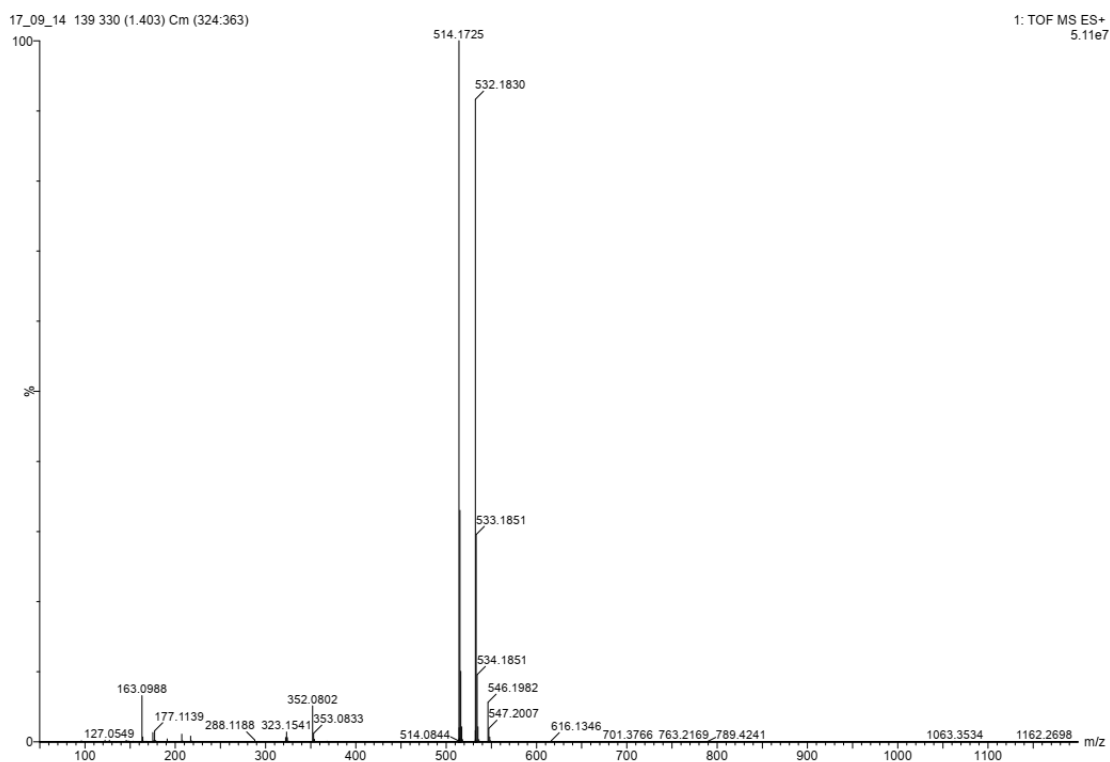

## HRMS for 4h

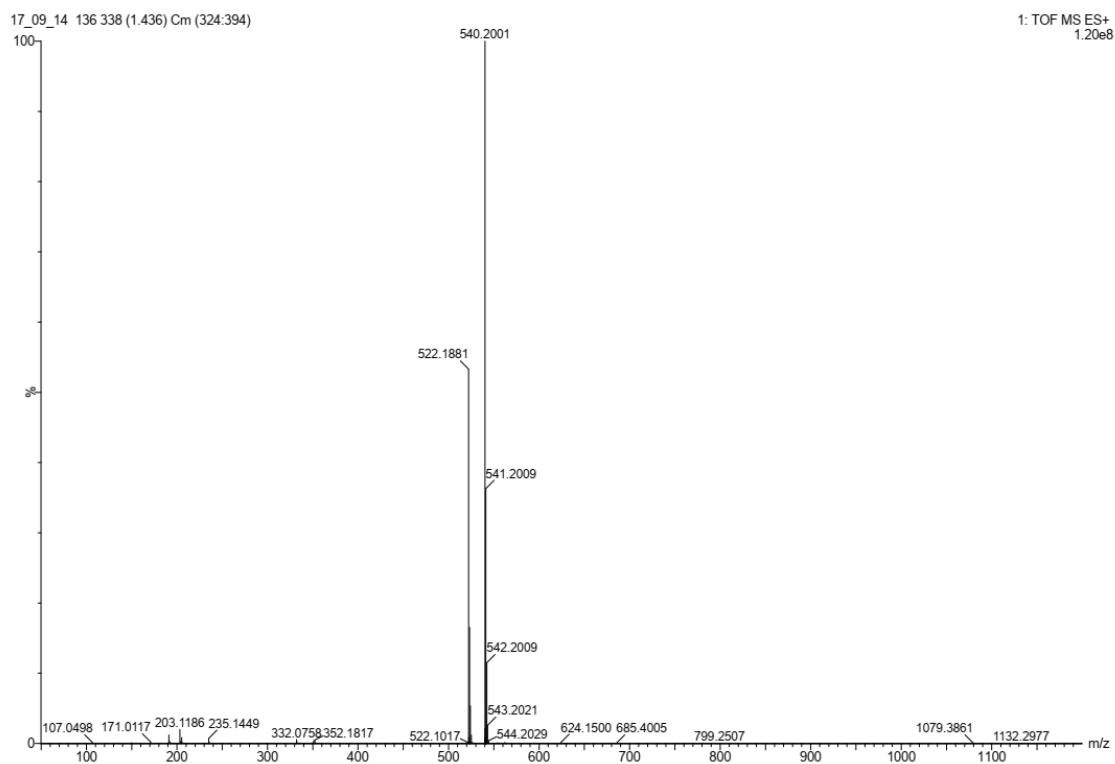

## HRMS for 4i

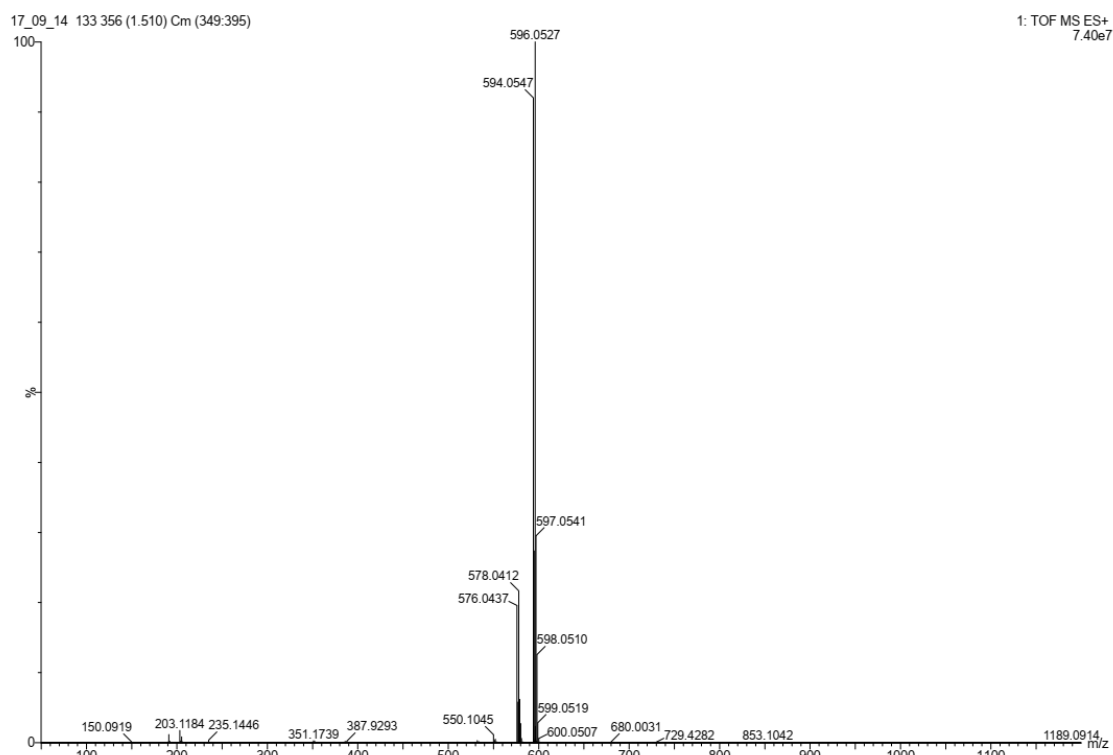

## HRMS for 4j

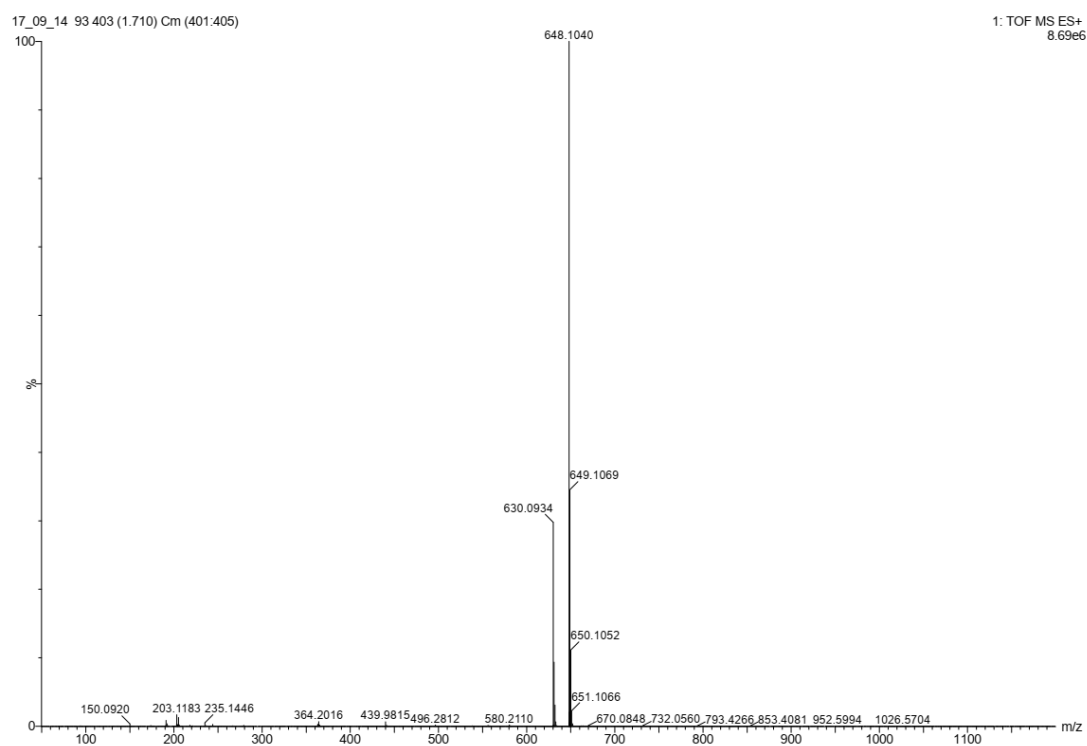



## HRMS for 4k

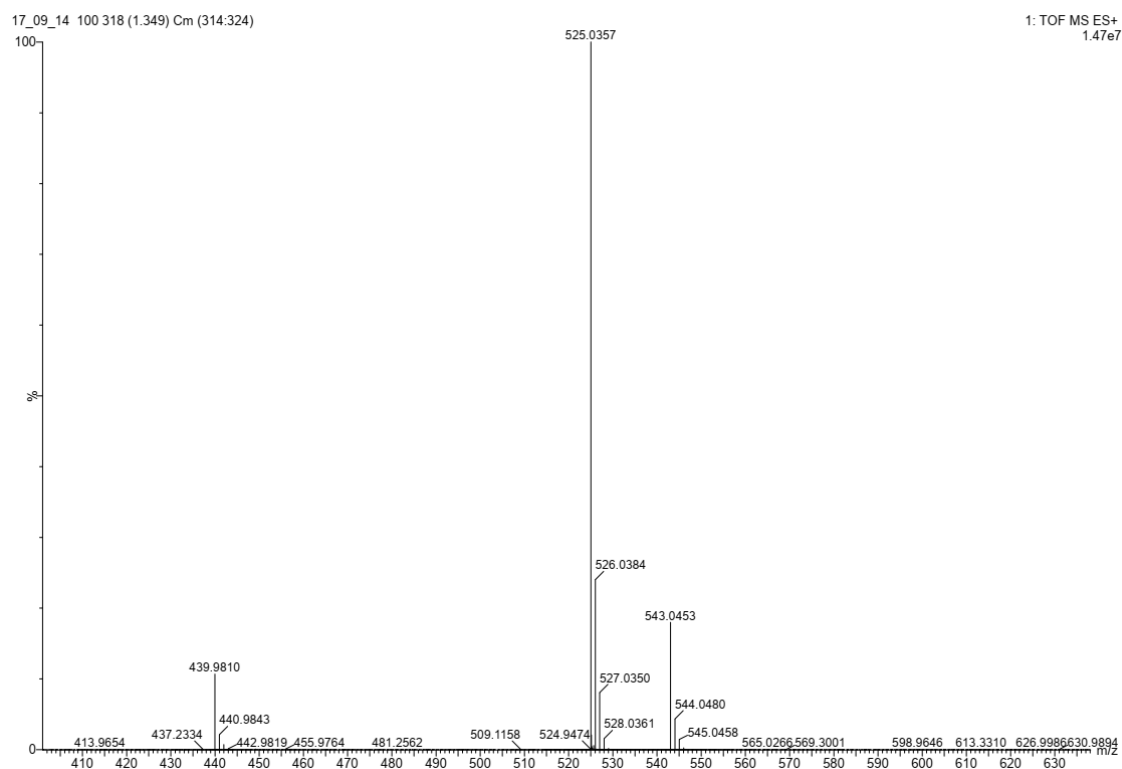

## HRMS for 4l

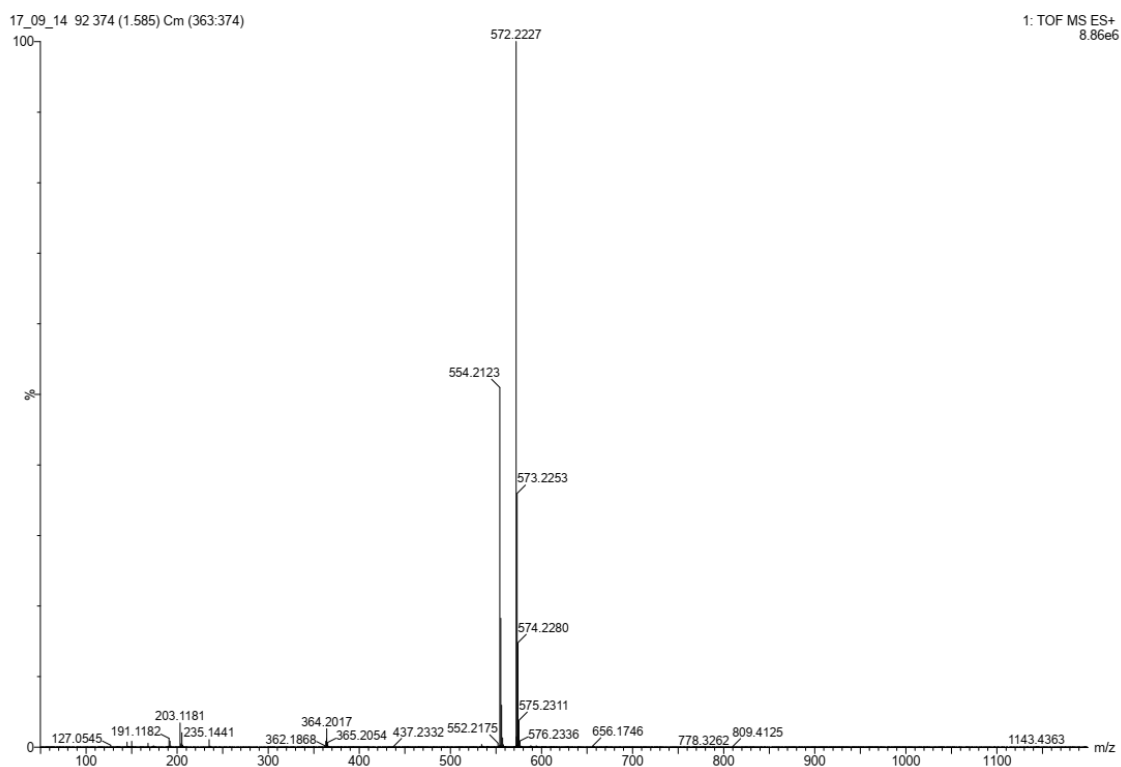

## HRMS for 4m

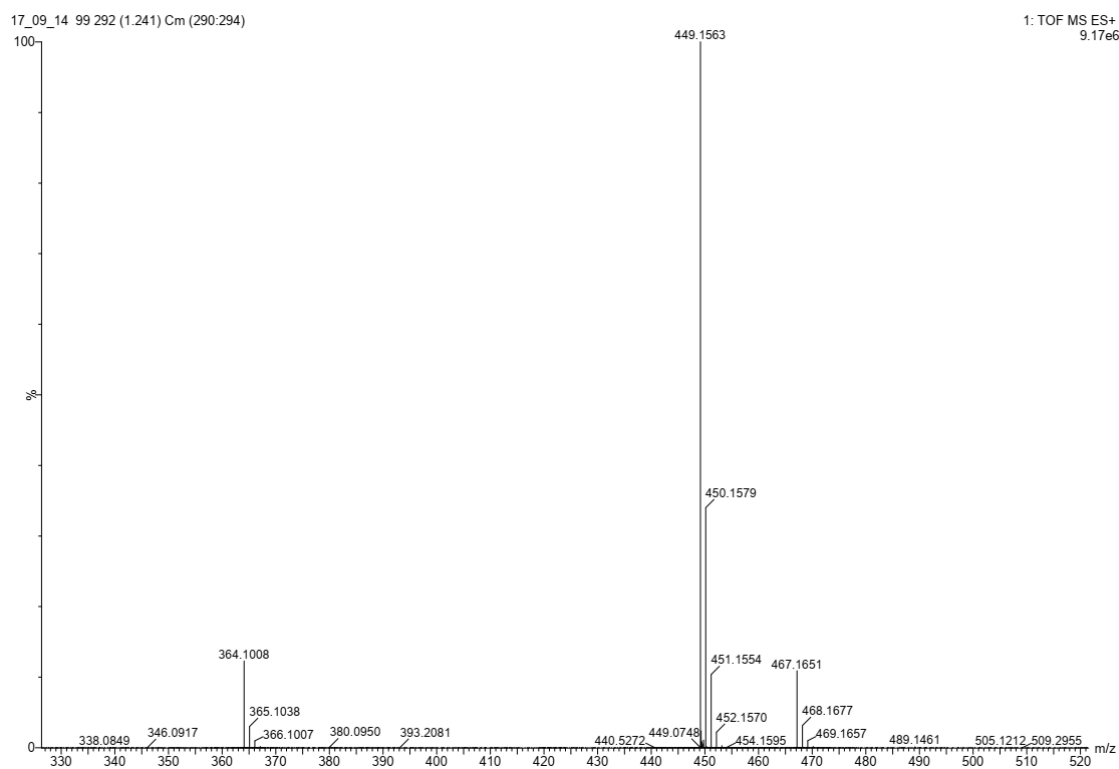

## HRMS for 4n

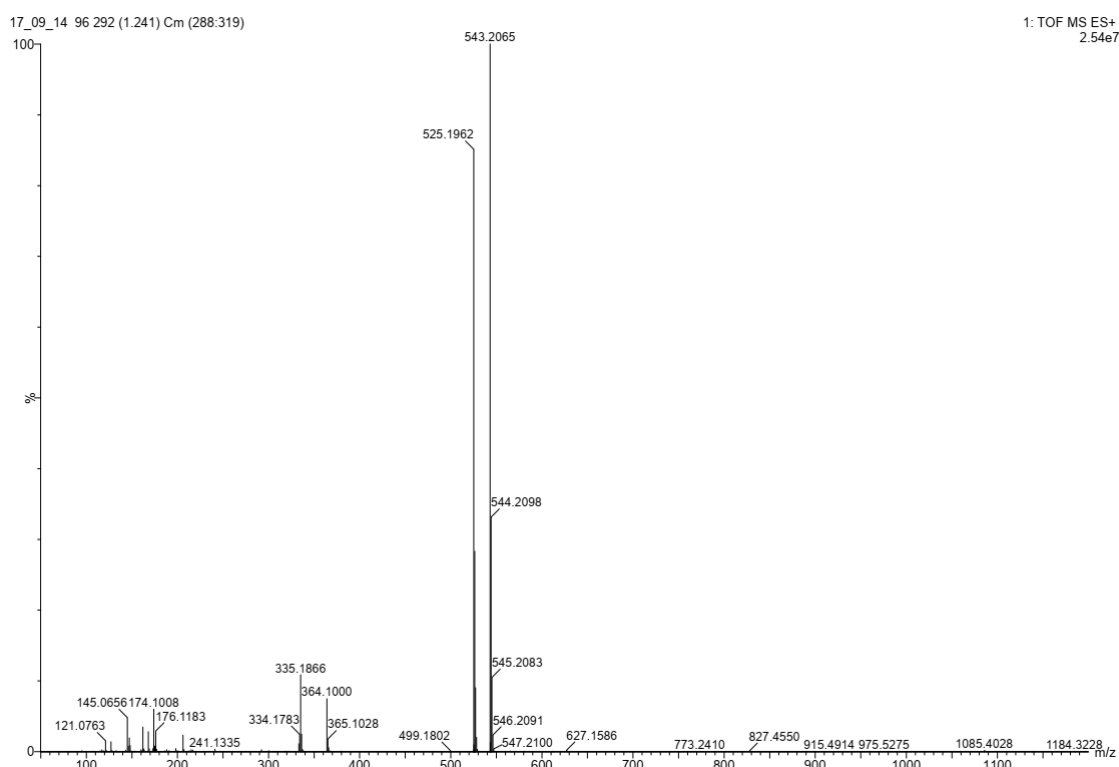

## HRMS for 4o

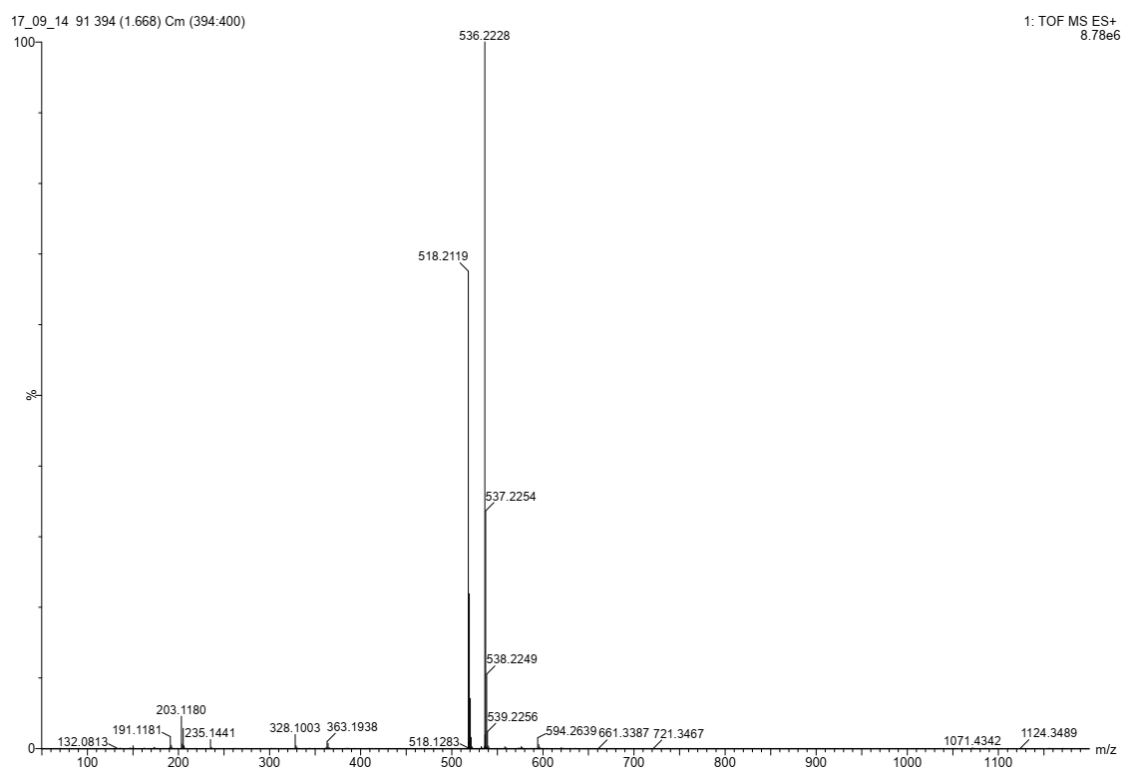

## HRMS for 4p

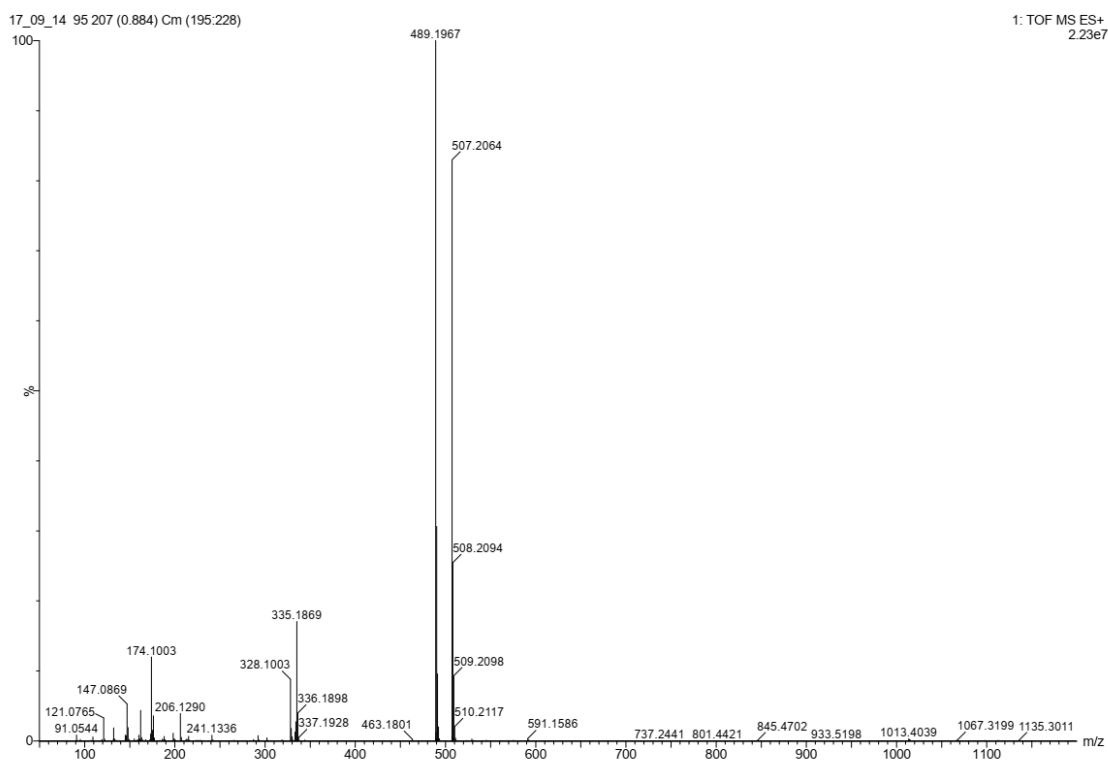

## HRMS for **4q**

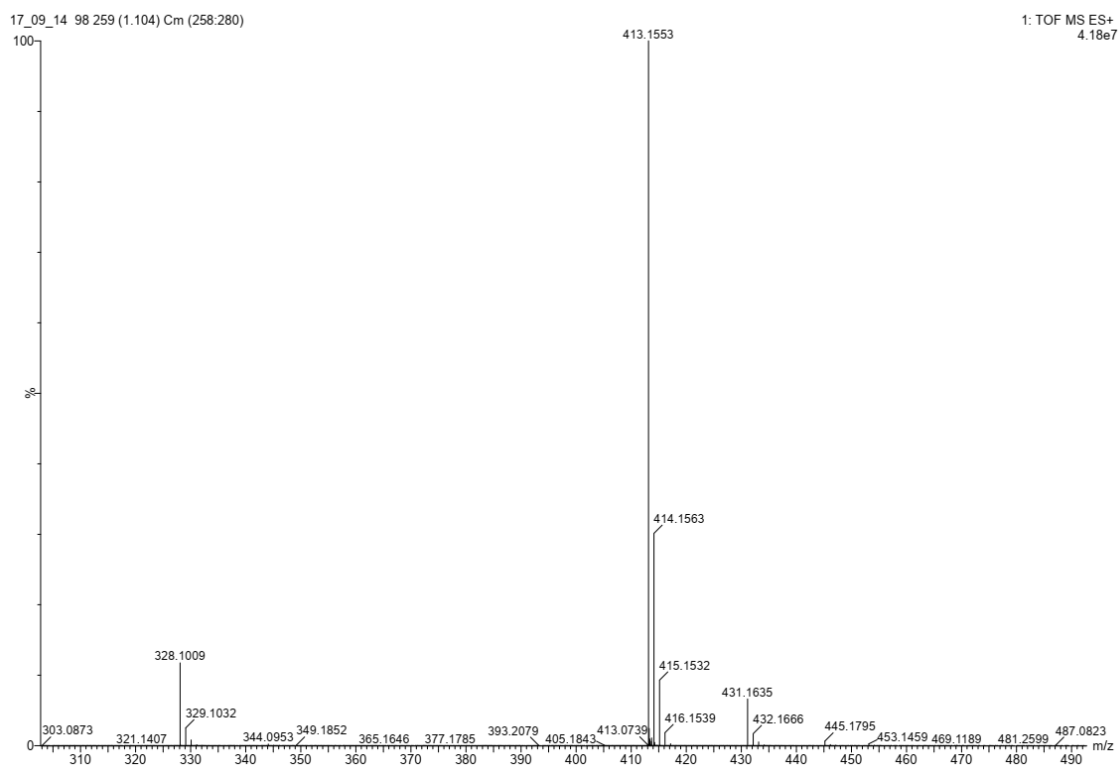

## HRMS for **4r**

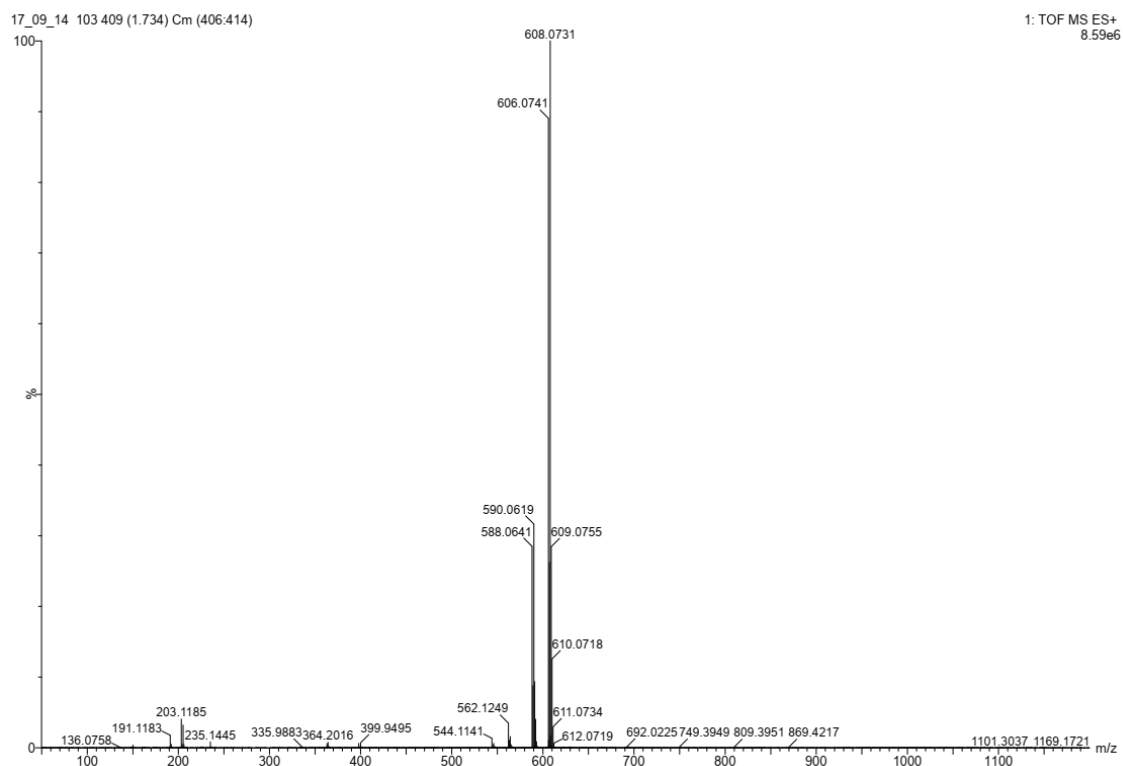

## HRMS for 4s

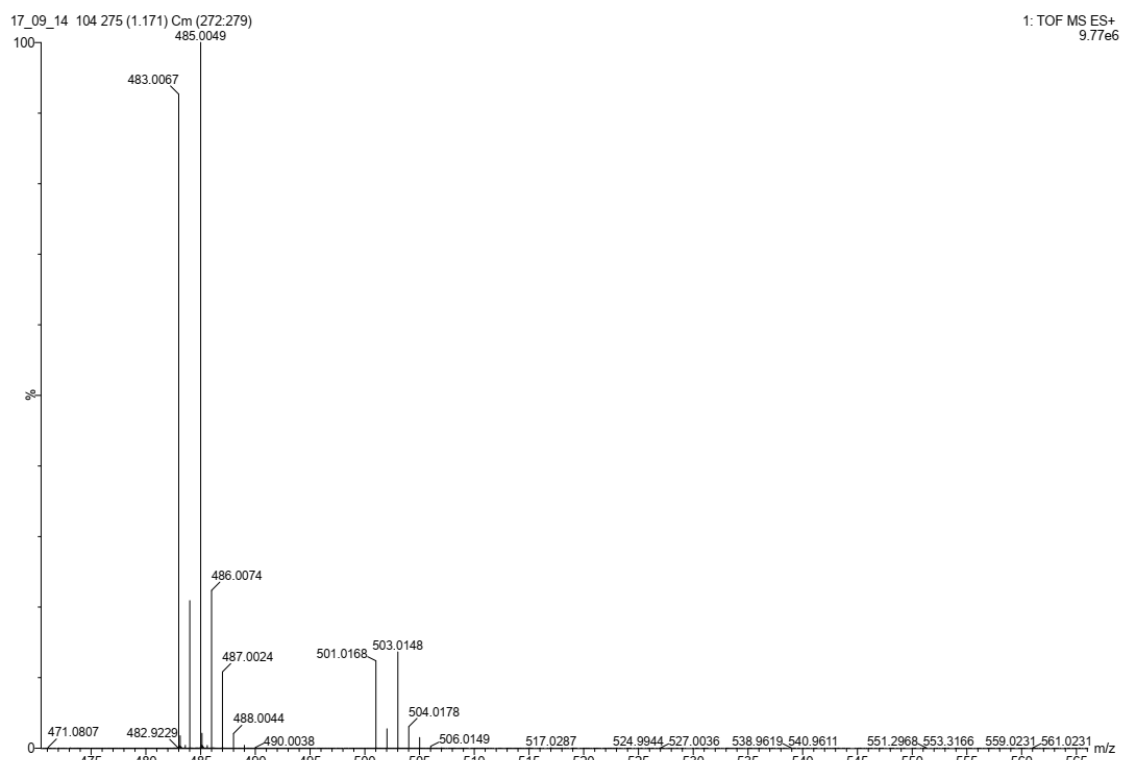

## HRMS for 4t

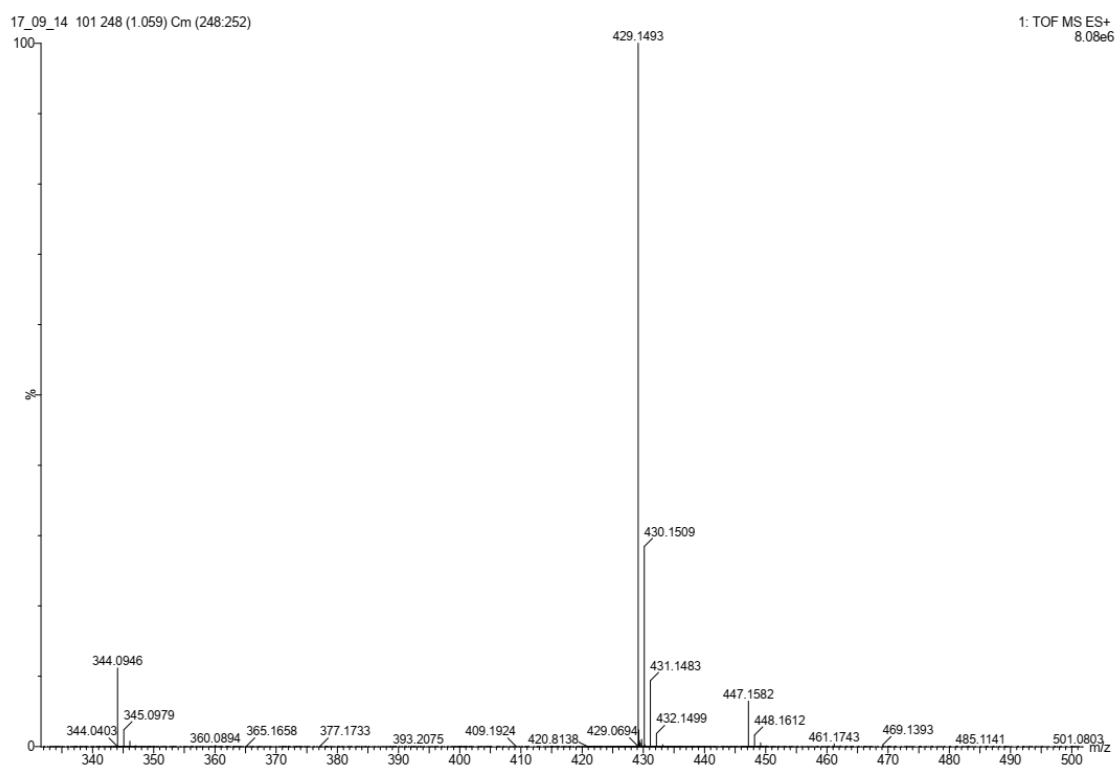

## HRMS for 4u

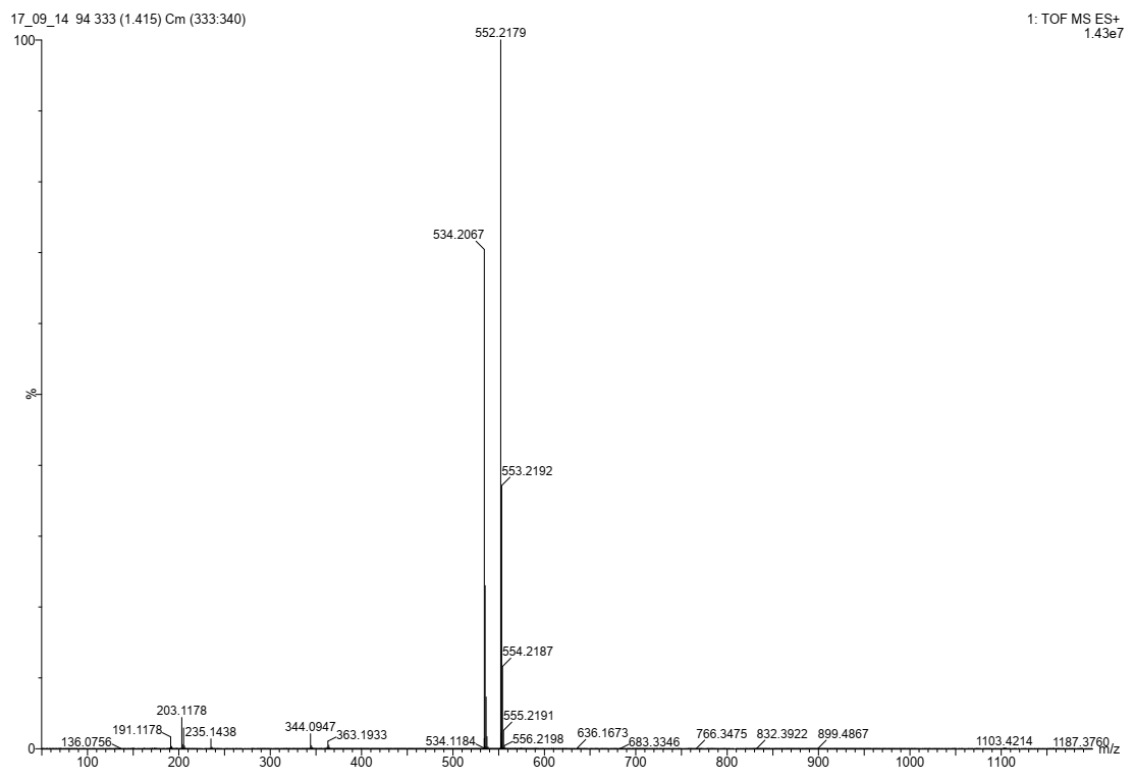

## HRMS for 4v

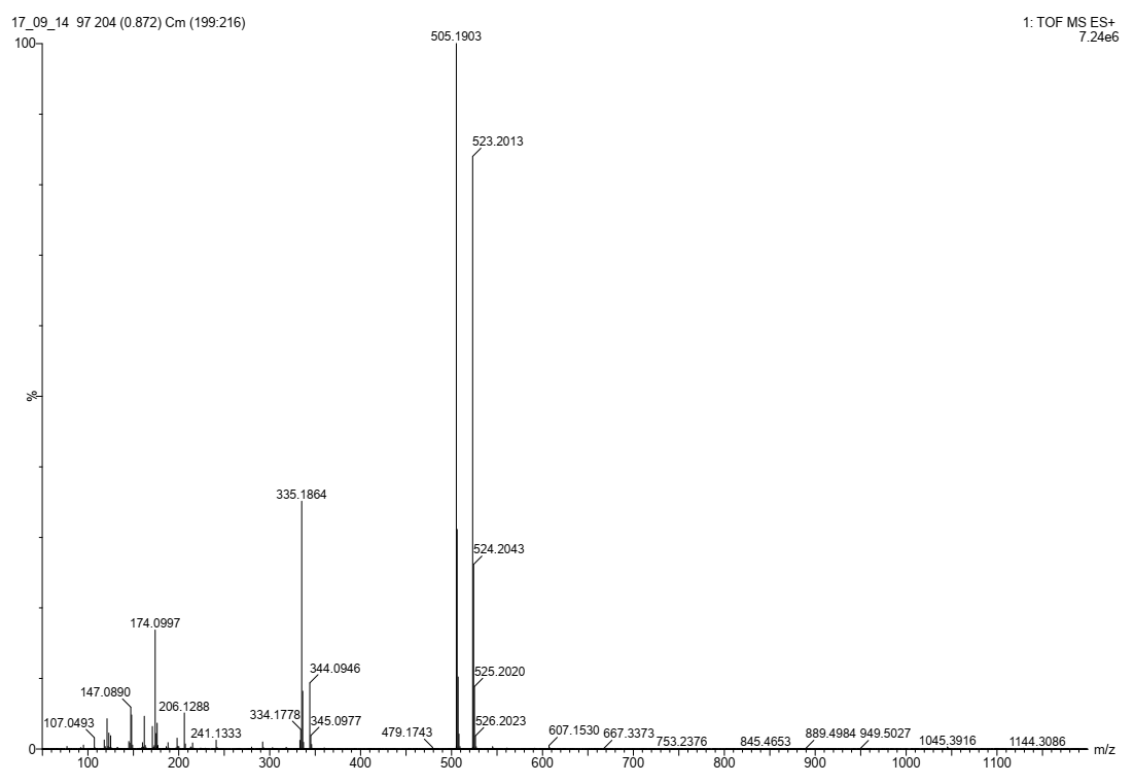

4.  $IC_{50}$  graphs for compounds 4a-4v and clozapine in 5-HT<sub>6</sub> radioligand binding assay.

$IC_{50}$  graph for 4a

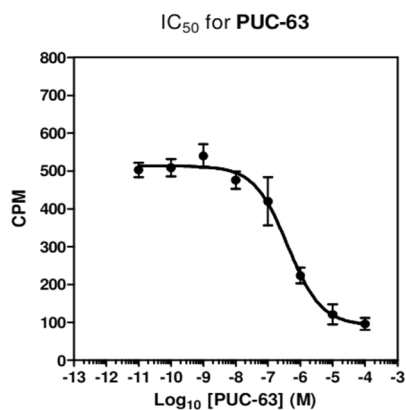

$IC_{50}$  graph for 4b

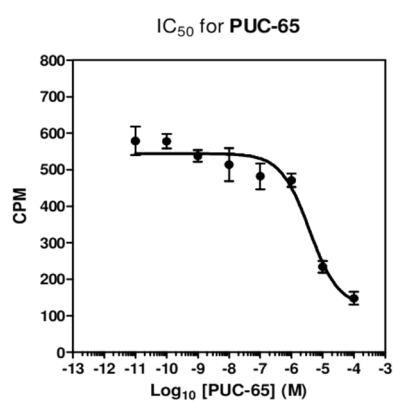

$IC_{50}$  graph for 4c

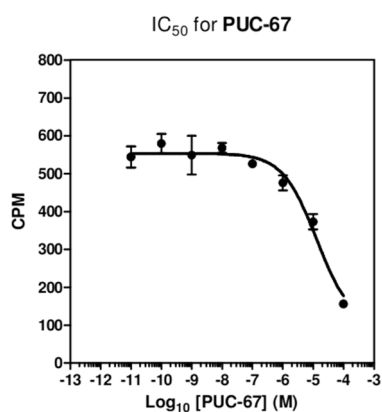

$IC_{50}$  graph for 4d

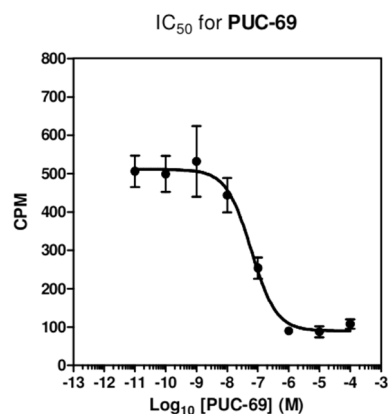

$IC_{50}$  graph for 4e

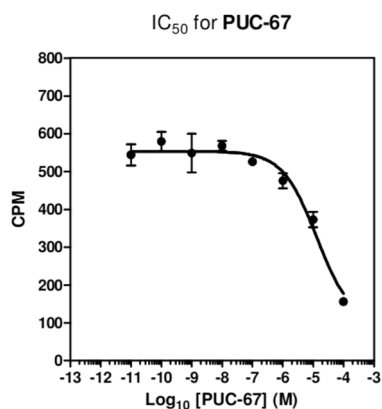

$IC_{50}$  graph for 4f

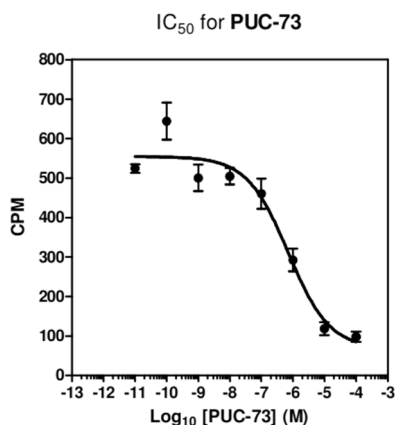

IC<sub>50</sub> graph for **4g**

IC<sub>50</sub> for **PUC-75**

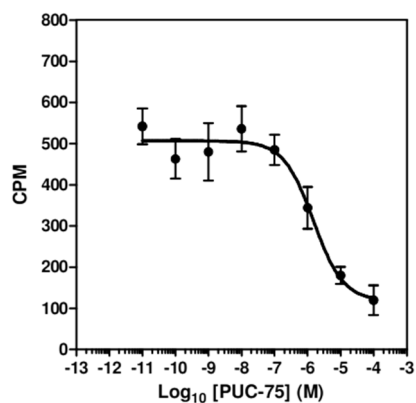

IC<sub>50</sub> graph for **4h**

IC<sub>50</sub> for **PUC-77**

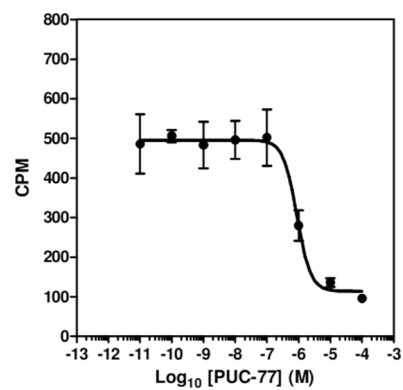

IC<sub>50</sub> graph for **4i**

IC<sub>50</sub> for **PUC-79**

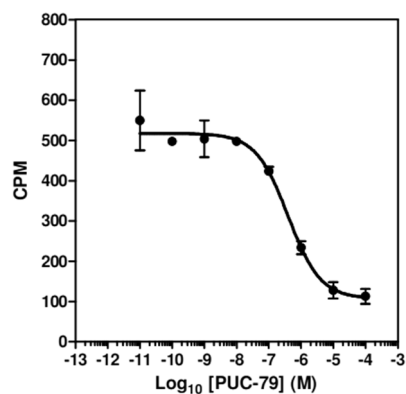

IC<sub>50</sub> graph for **4j**

IC<sub>50</sub> for **PUC-81**

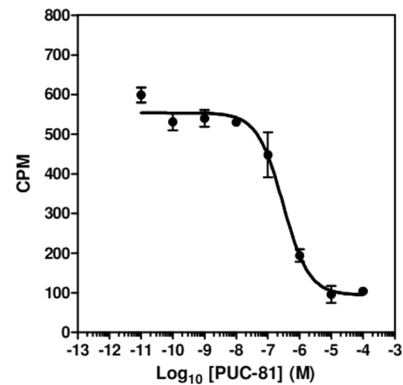

IC<sub>50</sub> graph for **4k**

IC<sub>50</sub> for **PUC-83**

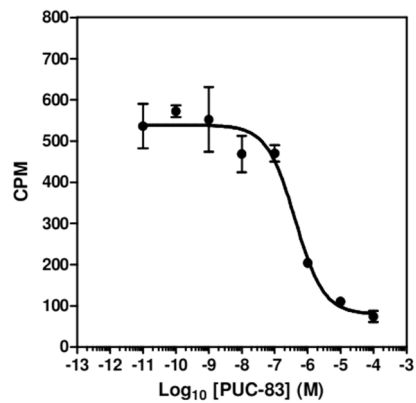

IC<sub>50</sub> graph for **4l**

IC<sub>50</sub> for **PUC-85**

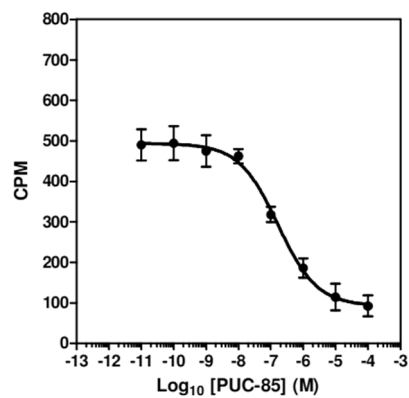



IC<sub>50</sub> graph for **4m**

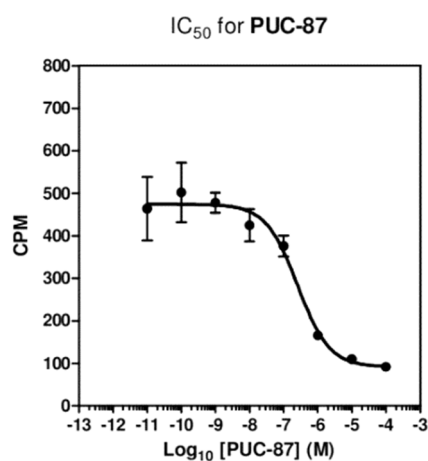

IC<sub>50</sub> graph for **4n**

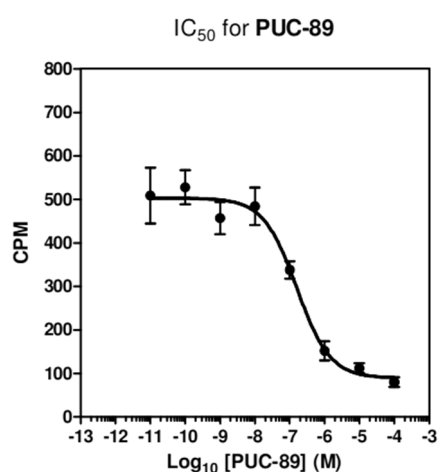

IC<sub>50</sub> graph for **4o**

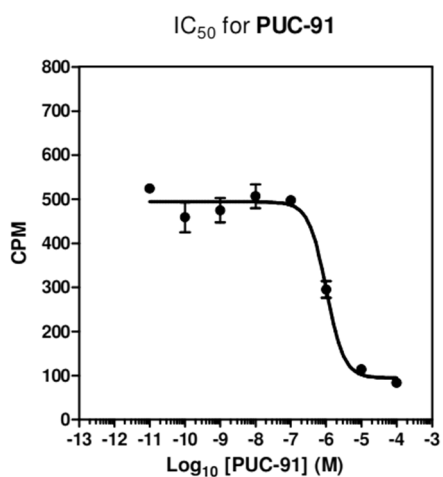

IC<sub>50</sub> graph for **4p**

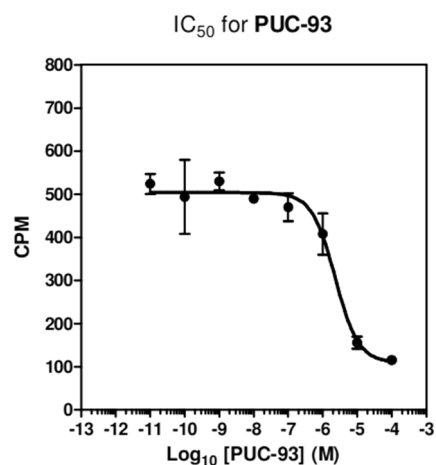

IC<sub>50</sub> graph for **4q**

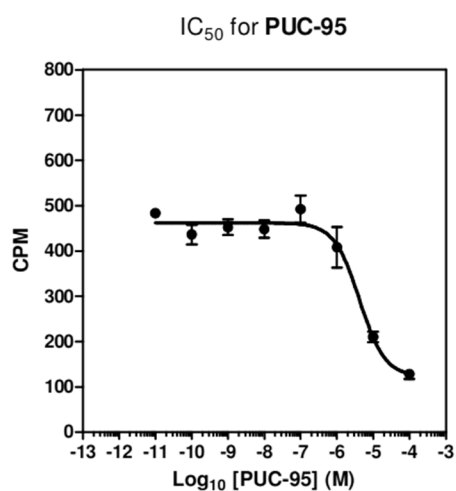

IC<sub>50</sub> graph for **4r**

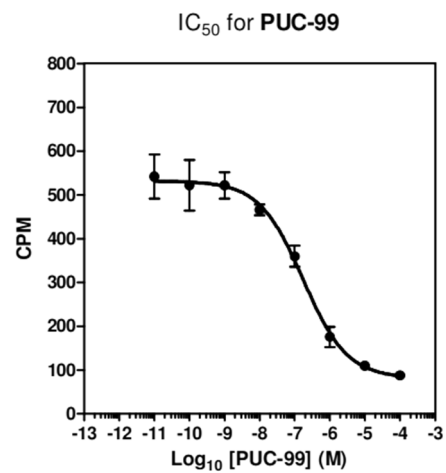

IC<sub>50</sub> graph for **4s**

IC<sub>50</sub> for **PUC-101**

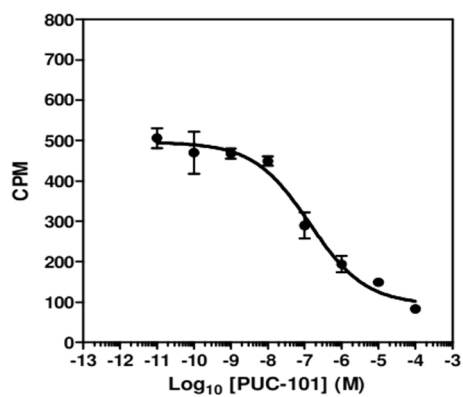

IC<sub>50</sub> graph for **4t**

IC<sub>50</sub> for **PUC-103**

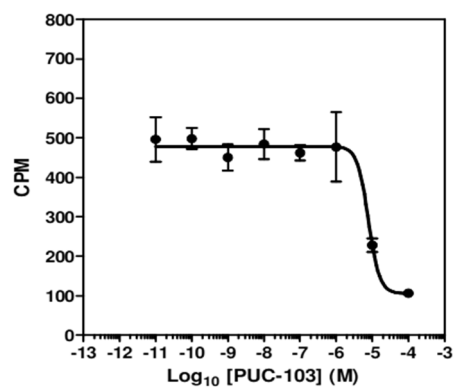

IC<sub>50</sub> graph for **4u**

IC<sub>50</sub> for **PUC-105**

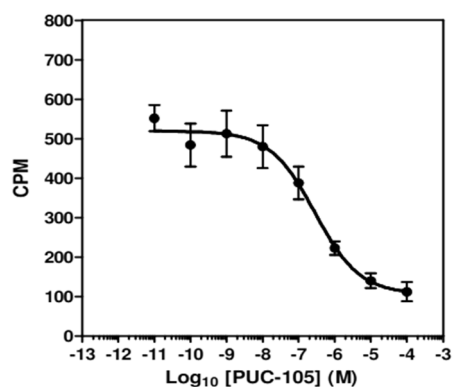

IC<sub>50</sub> graph for **4v**

IC<sub>50</sub> for **PUC-107**

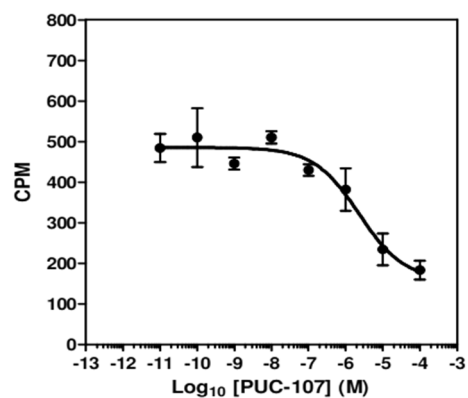

IC<sub>50</sub> graph for Clozapine

IC<sub>50</sub> for **Clozapine**

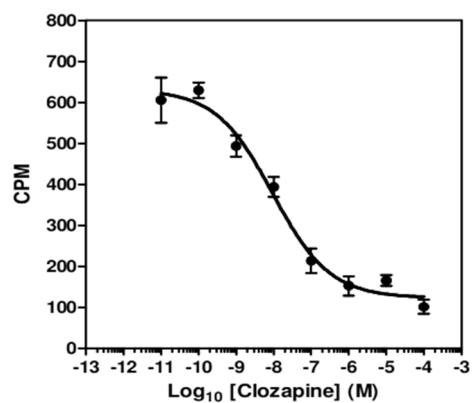

## 5. 3D-QSAR

**Table S1.** Statistical parameters and Field combinations for CoMFA and CoMSIA.

| Model       | q <sup>2</sup> | N | SEP   | SEE   | r <sup>2</sup> | F       | Field Contributions |       |       |       |       |
|-------------|----------------|---|-------|-------|----------------|---------|---------------------|-------|-------|-------|-------|
|             |                |   |       |       |                |         | S                   | E     | H     | D     | A     |
| CoMFA-S     | 0.665          | 3 | 0.410 | 0.224 | 0.900          | 81.432  | 1                   |       |       |       |       |
| CoMFA-E     | 0.64           | 2 | 0.418 | 0.222 | 0.898          | 123.484 |                     | 1     |       |       |       |
| CoMFA-SE    | 0.653          | 2 | 0.41  | 0.243 | 0.879          | 101.243 | 0.449               | 0.551 |       |       |       |
| CoMSIA-S    | 0.679          | 3 | 0.402 | 0.283 | 0.841          | 47.618  | 1                   |       |       |       |       |
| CoMSIA-E    | 0.643          | 4 | 0.431 | 0.179 | 0.939          | 99.431  |                     | 1     |       |       |       |
| CoMSIA-H    | 0.523          | 1 | 0.472 | 0.371 | 0.706          | 69.64   |                     |       | 1     |       |       |
| CoMSIA-D    | 0.384          | 7 | 0.603 | 0.213 | 0.923          | 39.279  |                     |       |       | 1     |       |
| CoMSIA-A    | 0.512          | 5 | 0.515 | 0.249 | 0.885          | 38.650  |                     |       |       |       | 1     |
| CoMSIA-SE   | 0.692          | 5 | 0.409 | 0.128 | 0.97           | 161.624 | 0.392               | 0.608 |       |       |       |
| CoMSIA-SEH  | 0.617          | 3 | 0.439 | 0.233 | 0.892          | 74.036  | 0.248               | 0.375 | 0.377 |       |       |
| CoMSIA-SEHD | 0.578          | 4 | 0.469 | 0.202 | 0.922          | 76.661  | 0.2                 | 0.303 | 0.296 | 0.2   |       |
| CoMSIA-SEHA | 0.596          | 3 | 0.45  | 0.254 | 0.871          | 61.03   | 0.191               | 0.293 | 0.304 |       | 0.212 |
| CoMSIA-SED  | 0.657          | 7 | 0.45  | 0.099 | 0.983          | 194.743 | 0.28                | 0.449 |       | 0.271 |       |
| CoMSIA-SEA  | 0.65           | 5 | 0.442 | 0.147 | 0.96           | 120.809 | 0.28                | 0.426 |       |       | 0.293 |
| CoMSIA-SEDA | 0.613          | 5 | 0.458 | 0.167 | 0.949          | 92.828  | 0.219               | 0.338 |       | 0.217 | 0.226 |
| CoMSIA-SH   | 0.577          | 2 | 0.453 | 0.312 | 0.799          | 55.626  | 0.376               |       | 0.624 |       |       |
| CoMSIA-SD   | 0.558          | 5 | 0.49  | 0.193 | 0.931          | 67.834  | 0.542               |       |       | 0.458 |       |
| CoMSIA-SA   | 0.597          | 4 | 0.459 | 0.245 | 0.885          | 50.031  | 0.465               |       |       |       | 0.535 |
| CoMSIA-SHD  | 0.541          | 2 | 0.472 | 0.334 | 0.769          | 46.684  | 0.251               |       | 0.402 | 0.347 |       |
| CoMSIA-SHA  | 0.562          | 3 | 0.469 | 0.273 | 0.852          | 51.754  | 0.271               |       | 0.426 |       | 0.303 |
| CoMSIA-SDA  | 0.53           | 5 | 0.505 | 0.206 | 0.922          | 58.858  | 0.337               |       |       | 0.303 | 0.36  |
| CoMSIA-SHDA | 0.524          | 3 | 0.489 | 0.292 | 0.83           | 43.979  | 0.204               |       | 0.321 | 0.248 | 0.227 |
| CoMSIA-EH   | 0.575          | 4 | 0.471 | 0.163 | 0.949          | 120.591 |                     | 0.52  | 0.48  |       |       |
| CoMSIA-ED   | 0.616          | 7 | 0.476 | 0.121 | 0.975          | 129.339 |                     | 0.63  |       | 0.37  |       |
| CoMSIA-EA   | 0.605          | 5 | 0.463 | 0.168 | 0.948          | 91.456  |                     | 0.587 |       |       | 0.413 |
| CoMSIA-EHD  | 0.549          | 2 | 0.468 | 0.3   | 0.814          | 61.186  |                     | 0.342 | 0.362 | 0.296 |       |
| CoMSIA-EHA  | 0.561          | 5 | 0.488 | 0.141 | 0.963          | 131.673 |                     | 0.374 | 0.358 |       | 0.268 |
| CoMSIA-EDA  | 0.588          | 7 | 0.493 | 0.12  | 0.976          | 131.854 |                     | 0.44  |       | 0.276 | 0.283 |
| CoMSIA-EHDA | 0.531          | 5 | 0.504 | 0.153 | 0.957          | 111.34  |                     | 0.301 | 0.291 | 0.198 | 0.21  |
| CoMSIA-HD   | 0.476          | 2 | 0.504 | 0.336 | 0.767          | 46.047  |                     |       | 0.549 | 0.451 |       |
| CoMSIA-HA   | 0.504          | 2 | 0.49  | 0.333 | 0.771          | 47.145  |                     |       | 0.588 |       | 0.412 |
| CoMSIA-HDA  | 0.474          | 2 | 0.505 | 0.349 | 0.749          | 41.769  |                     |       | 0.392 | 0.336 | 0.272 |
| CoMSIA-DA   | 0.453          | 7 | 0.568 | 0.18  | 0.945          | 56.843  |                     |       |       | 0.457 | 0.543 |
| CoMSIA-ALL  | 0.566          | 3 | 0.467 | 0.27  | 0.855          | 52.887  | 0.155               | 0.238 | 0.246 | 0.19  | 0.171 |

<sup>a</sup> q<sup>2</sup> = the square of the LOO cross-validation (CV) coefficient; N = the optimum number of components; SEP = standard error of prediction; SEE is the standard error of estimation of non CV analysis; r<sup>2</sup><sub>ncv</sub> is the square of the non CV coefficient; F is the F-test value; S, E, H, D and A are the steric, electrostatic, hydrophobic, hydrogen-bond donor, and hydrogen-bond acceptor contributions respectively.

## External validation

The models were subjected to external validation criteria according to the proposed test by Golbraikh and Tropsha [1,2], which considers a QSAR model predictive, if some of the following conditions are satisfied:

$$q^2 > 0.5 \quad (2)$$

$$r^2 > 0.6 \quad (3)$$

$$\frac{|r^2 - r_0^2|}{r^2} < 0.1 \text{ or } \frac{|r^2 - r_0'^2|}{r^2} < 0.1 \quad (4)$$

$$0.85 \leq k \leq 1.15 \text{ or } 0.85 \leq k' \leq 1.15 \quad (5)$$

$$|r_0^2 - r_0'^2| < 0.3 \quad (6)$$

$$r_m^2 = r^2 (1 - \sqrt{r^2 - r_0^2}) \quad (7)$$

Where  $r^2$  and  $r_0^2$  are the squared correlation coefficients between the observed and predicted activities of the test set with and without the (0,0) intercept, respectively [1,3].

**Table S2.** Summary of external validation parameters for CoMFA and CoMSIA.

| Condition | Parameters             | Threshold value                | CoMFA | CoMSIA |
|-----------|------------------------|--------------------------------|-------|--------|
| 1         | $q^2$                  | >0.5                           | 0.653 | 0.692  |
| 2         | $r_{test}^2$           | >0.6                           | 0.786 | 0.726  |
| 3a        | $r_0^2$                | Close to value of $r_{test}^2$ | 0.999 | 0.999  |
| 3b        | $r_0'^2$               | Close to value of $r_{test}^2$ | 0.999 | 0.999  |
| 4a        | $k$                    | $0.85 < k < 1.15$              | 0.995 | 1.004  |
| 4b        | $k'$                   | $0.85 < k' < 1.15$             | 1.004 | 0.995  |
| 5a        | $ (r^2 - r_0^2) /r^2$  | <0.1                           | 0.271 | 0.376  |
| 5b        | $ (r^2 - r_0'^2) /r^2$ | <0.1                           | 0.271 | 0.376  |
| 6         | $ r_0^2 - r_0'^2 $     | <0.3                           | 0.000 | 0.000  |
| 7         | $r_m^2$                | >0.5                           | 0.423 | 0.347  |

$q^2$  and  $r_{test}^2$  are the same parameters as listed in table 1;  $r_0^2$  and  $k$  are the correlation coefficient between the actual and predicted activities for test set and the respective slope of regression; and  $r_0'^2$  and  $k'$  are the correlation coefficient between the predicted and actual activities for test set and the respective slope of regression.  $r_m^2$  is the  $r^2$  metric.

**Table S3.** Experimental and predicted pIC<sub>50</sub> and residual values for analyzed compounds according to CoMFA and CoMSIA.

| Molecule | Exp.<br>pKi(M) | CoMFA             |          | CoMSIA            |          |
|----------|----------------|-------------------|----------|-------------------|----------|
|          |                | Predicted pKi (M) | Residual | Predicted pKi (M) | Residual |
| 4aR      | 6.409          | 6.459             | -0.05    | 6.500             | -0.09    |
| 4aS      | 6.409          | 6.534             | -0.13    | 6.548             | -0.14    |
| 4bR      | 5.440          | 5.762             | -0.32    | 5.546             | -0.11    |
| 4bS      | 5.440          | 5.668             | -0.23    | 5.442             | 0.00     |
| 4cR      | 4.902          | 4.960             | -0.06    | 5.046             | -0.14    |
| 4cS      | 4.902          | 5.089             | -0.19    | 4.928             | -0.03    |
| 4dR      | 7.234          | 7.115             | 0.12     | 7.381             | -0.15    |
| 4dS      | 7.234          | 6.699             | 0.54     | 6.921             | 0.31     |
| 4eR*     | 6.096          | 6.083             | 0.01     | 6.215             | -0.12    |
| 4eS      | 6.096          | 6.093             | 0.00     | 6.022             | 0.07     |
| 4fR      | 6.165          | 5.965             | 0.20     | 6.211             | -0.05    |
| 4fS      | 6.165          | 6.179             | -0.01    | 6.034             | 0.13     |
| 4gR*     | 5.840          | 5.912             | -0.07    | 6.008             | -0.17    |
| 4gS      | 5.840          | 6.157             | -0.32    | 5.718             | 0.12     |
| 4hR*     | 6.071          | 5.950             | 0.12     | 6.134             | -0.06    |
| 4hS*     | 6.071          | 5.861             | 0.21     | 6.192             | -0.12    |
| 4iR      | 6.419          | 6.674             | -0.25    | 6.517             | -0.10    |
| 4iS      | 6.419          | 6.567             | -0.15    | 6.561             | -0.14    |
| 4jR      | 6.539          | 6.471             | 0.07     | 6.694             | -0.15    |
| 4jS      | 6.539          | 6.602             | -0.06    | 6.551             | -0.01    |
| 4kR*     | 6.395          | 5.767             | 0.63     | 5.567             | 0.83     |
| 4kS      | 6.395          | 6.241             | 0.15     | 6.468             | -0.07    |
| 4lR*     | 6.796          | 6.779             | 0.02     | 6.965             | -0.17    |
| 4lS*     | 6.796          | 6.829             | -0.03    | 6.486             | 0.31     |
| 4mR      | 6.607          | 6.510             | 0.10     | 6.533             | 0.07     |
| 4mS*     | 6.607          | 6.270             | 0.34     | 6.575             | 0.03     |
| 4nR      | 6.815          | 6.273             | 0.54     | 6.565             | 0.25     |
| 4nS      | 6.815          | 6.973             | -0.16    | 6.793             | 0.02     |
| 4oR*     | 6.012          | 6.083             | -0.07    | 6.327             | -0.32    |
| 4oS      | 6.012          | 6.275             | -0.26    | 6.044             | -0.03    |
| 4pR*     | 5.659          | 5.920             | -0.26    | 5.780             | -0.12    |
| 4pS*     | 5.659          | 5.998             | -0.34    | 5.693             | -0.03    |
| 4qR      | 5.395          | 5.040             | 0.36     | 5.310             | 0.09     |
| 4qS      | 5.395          | 5.534             | -0.14    | 5.415             | -0.02    |
| 4rR      | 6.775          | 6.655             | 0.12     | 6.835             | -0.06    |
| 4rS      | 6.775          | 6.922             | -0.15    | 6.659             | 0.12     |
| 4sR      | 6.886          | 5.322             | 1.56     | 5.449             | 1.44     |
| 4sS      | 6.886          | 6.579             | 0.31     | 6.805             | 0.08     |
| 4tR      | 5.125          | 4.840             | 0.29     | 5.034             | 0.09     |
| 4tS      | 5.125          | 5.155             | -0.03    | 5.088             | 0.04     |
| 4uR*     | 6.567          | 6.333             | 0.23     | 6.637             | -0.07    |

|             |       |       |       |       |       |
|-------------|-------|-------|-------|-------|-------|
| <b>4uS*</b> | 6.567 | 6.456 | 0.11  | 6.083 | 0.48  |
| <b>4vR</b>  | 5.660 | 5.863 | -0.20 | 5.602 | 0.06  |
| <b>4vS</b>  | 5.660 | 5.896 | -0.24 | 5.730 | -0.07 |

\* test set compounds.

### Applicability domain calculation

The AD was evaluated based on the simple standardization method reported by Roy et al. [4]. First, each descriptor "i" for each compound "k" is standardized ( $S_{ik}$ ). Every compound must have a maximum value  $[S_i]_{\max(k)} \leq 3$ . In the case that  $[S_i]_{\max(k)} > 3$  and its minimum value  $[S_i]_{\min(k)} < 3$ , then the  $S_{new(k)}$  parameter must be calculated and has to fulfill the condition:  $S_{new(k)} = \bar{S}_k + 1.28 * \sigma_{S_k}$ , where  $\bar{S}_k$  is the mean of  $S_{ik}$  values for compound  $k$  and  $\sigma_{S_k}$  is the standard deviation for such values. The software is available free of charge on the authors' website: <http://dtclab.webs.com/software-tools> and [http://teqip.jdvu.ac.in/QSAR\\_Tools/](http://teqip.jdvu.ac.in/QSAR_Tools/).

### 6. References

1. Golbraikh, A.; Tropsha, A. Beware of q<sup>2</sup>! *Journal of Molecular Graphics and Modelling* **2002**, *20*, 269-276, doi:[https://doi.org/10.1016/S1093-3263\(01\)00123-1](https://doi.org/10.1016/S1093-3263(01)00123-1).
2. Tropsha, A. Best Practices for QSAR Model Development, Validation, and Exploitation. *Molecular Informatics* **2010**, *29*, 476-488, doi:<https://doi.org/10.1002/minf.201000061>.
3. Roy, K.; Chakraborty, P.; Mitra, I.; Ojha, P.K.; Kar, S.; Das, R.N. Some case studies on application of "rm<sup>2</sup>" metrics for judging quality of quantitative structure–activity relationship predictions: Emphasis on scaling of response data. *Journal of Computational Chemistry* **2013**, *34*, 1071-1082, doi:<https://doi.org/10.1002/jcc.23231>.
4. Roy, K.; Kar, S.; Ambure, P. On a simple approach for determining applicability domain of QSAR models. *Chemometrics and Intelligent Laboratory Systems* **2015**, *145*, 22-29, doi:<https://doi.org/10.1016/j.chemolab.2015.04.013>.
